# Supplementary material for: Base-catalyzed cascade synthesis of 2,3-dihydrofuro[2,3-b]pyridines and 2,3-dihydro-1H-pyrrolo[2,3-b]pyridines from N-propargylic β-enaminones
Source: Royal Society of Chemistry journal article supplement (doi:10.1039/c7cc03308g), 2017-01-01

## Supporting Information

### Base-catalyzed cascade synthesis of 2,3-dihydrofuro- [2,3-*b*]pyridines and 2,3-dihydro-1*H*-pyrrolo[2,3-*b*]pyridines from *N*-propargylic $\beta$ -enaminones

Xiaobing Yang<sup>a,b</sup>, Fangzhong Hu<sup>\*a</sup>, Yang Wang<sup>a</sup>, Chiming Yang<sup>\*a,b</sup>, Xiaomao Zou<sup>a</sup>, Jiahui Liu<sup>a</sup>, Qichun Zhang<sup>\*c,d</sup>

<sup>a</sup>State Key Laboratory and Institute of Elemento-Organic Chemistry, Nankai University, Tianjin 300071, China

<sup>b</sup>Department of Chemistry, College of Chemistry, Nankai University, Tianjin 300071, China

<sup>c</sup>School Materials Science Engineering, Nanyang Technological University, 50 Nanyang Avenue, Singapore 637371, Singapore

<sup>d</sup>Division of Chemistry and Biological Chemistry, School of Physical and Mathematical Sciences, Nanyang Technological University, Singapore 637371, Singapore

Emails: fzhu@nankai.edu.cn, chmyang@nankai.edu.cn, qc Zhang@ntu.edu.sg

### Table of Contents

|                                                         |         |
|---------------------------------------------------------|---------|
| General Information                                     | S2      |
| Experimental Procedures and Data for Compounds <b>3</b> | S3-S16  |
| Experimental Procedures and Data for Compounds <b>5</b> | S16-S23 |
| Synthetic Transformations                               | S23-S24 |
| References                                              | S25     |
| X-Ray Structure of <b>3a</b>                            | S26-S27 |
| NMR Spectra of Products                                 | S28-S76 |

## General Information

All of the chemicals were obtained from commercially-available sources or prepared according to standard methods.  $^1\text{H}$ ,  $^{19}\text{F}$  and  $^{13}\text{C}$  NMR spectra were recorded using a Bruker AV 400 MHz NMR spectrometer. TMS was used as an internal standard. Chemical shifts were reported in ppm downfield from  $\text{CDCl}_3$  ( $\delta = 7.26$  ppm) or  $\text{DMSO-}d_6$  ( $\delta = 2.50$  ppm) for  $^1\text{H}$  NMR and relative to the central  $\text{CDCl}_3$  or  $\text{DMSO-}d_6$  resonance ( $\delta = 77.0$  ppm or  $39.5$  ppm) for  $^{13}\text{C}$  NMR spectroscopy. Multiplicities were reported as follows: singlet (s), doublet (d), triplet (t), quartet (q), multiplet (m), doublet of doublets (dd) and doublet of triplets (dt). Coupling constants ( $J$ ) were reported in Hertz (Hz). Melting points were measured on a RY-I apparatus and uncorrected. HRMS were recorded on an IonSpec FT-ICR mass spectrometer with Electron Spray Ionization (ESI) resource.

## General Procedure for the Preparation *N*-propargyl $\beta$ -enaminones

All the *N*-propargyl  $\beta$ -enaminones (**1**) were prepared according to the literature procedure<sup>1</sup>.

## General procedure for the synthesis of *N*-sulfonyl imines

All the *N*-sulfonyl imines (**4**) were prepared according to the literature procedure<sup>2</sup>.

## Experimental Procedures and Data for Compounds **3**

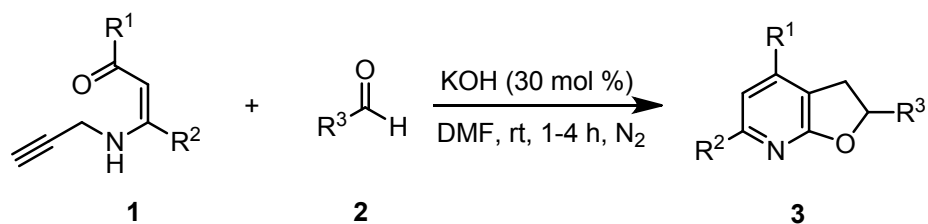

A mixture of *N*-propargylic  $\beta$ -enaminones **1** (0.4 mmol), arylaldehydes **2** (0.4 mmol), and KOH (8 mg, 0.12 mmol, 0.3 equiv) in DMF (3 mL) was stirred at room temperature under  $N_2$  for 1-4 h. After **1** was disappeared completely (monitored by TLC), the residue dissolved in  $H_2O$  (10 mL) and extracted with EtOAc (3 x 10 mL). The combined EtOAc extracts were dried over  $Na_2SO_4$  and concentrated. Then the solvent was evaporated and the residue was purified by chromatography (silica gel, 1% EtOAc in PE) to give **3**.

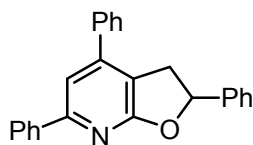

2,4,6-Triphenyl-2,3-dihydrofuro[2,3-*b*]pyridine (**3a**). Pale yellow solid; 99.2 mg (71% yield); mp 140-141 °C;  $^1H$  NMR ( $CDCl_3$ , 400 MHz):  $\delta$  8.08 (d,  $J = 7.2$  Hz, 2H, ArH), 7.56 (d,  $J = 7.0$  Hz, 2H, ArH), 7.50-7.37 (m, 11H, ArH), 7.33 (t,  $J = 7.2$  Hz, 1H, ArH), 5.90 (t,  $J = 8.6$  Hz, 1H, CH), 3.84 (dd,  $J = 16.4, 9.4$  Hz, 1H,  $CH_2$ ), 3.39 (dd,  $J = 16.3, 7.8$  Hz, 1H,  $CH_2$ );  $^{13}C$  NMR ( $CDCl_3$ , 100 MHz):  $\delta$  168.7, 155.9, 147.5, 141.3, 138.9, 138.0, 128.8, 128.8, 128.7, 128.7, 128.6, 128.1, 127.7, 126.8, 125.4, 115.2, 113.5, 81.8, 37.1; HRMS (ESI)  $m/z$   $[M + H]^+$  calculated for  $C_{25}H_{20}NO$ : 350.1545, found: 350.1543.

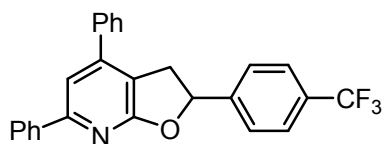

4,6-Diphenyl-2-(4-(trifluoromethyl)phenyl)-2,3-dihydrofuro[2,3-*b*]pyridine (**3b**).

Yellow solid; 130.2 mg (78% yield); mp 113-114 °C; <sup>1</sup>H NMR (CDCl<sub>3</sub>, 400 MHz): δ 8.07 (dd, *J* = 8.5, 1.5 Hz, 2H, ArH), 7.65 (d, *J* = 8.3 Hz, 2H, ArH), 7.59 (d, *J* = 8.4 Hz, 2H, ArH), 7.54 (dd, *J* = 8.2, 1.5 Hz, 2H, ArH), 7.51-7.39 (m, 7H, ArH), 5.96 (t, *J* = 8.5 Hz, 1H, CH), 3.90 (dd, *J* = 16.3, 9.5 Hz, 1H, CH<sub>2</sub>), 3.35 (dd, *J* = 16.3, 7.7 Hz, 1H, CH<sub>2</sub>); <sup>13</sup>C NMR (CDCl<sub>3</sub>, 100 MHz): δ 168.5, 156.1, 147.8, 145.4, 138.7, 137.8, 130.2 (q, *J*<sub>C-F</sub> = 32.8 Hz), 129.0, 128.9, 128.8, 128.6, 127.7, 126.8, 125.7 (q, *J*<sub>C-F</sub> = 3.8 Hz), 125.7, 124.0 (q, *J*<sub>C-F</sub> = 270.6 Hz), 114.6, 113.8, 80.8, 37.1; HRMS (ESI) *m/z* [M + H]<sup>+</sup> calculated for C<sub>26</sub>H<sub>19</sub>F<sub>3</sub>NO: 418.1419, found: 418.1421.

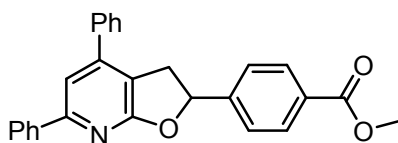

Methyl 4-(4,6-diphenyl-2,3-dihydrofuro[2,3-*b*]pyridin-2-yl)benzoate (**3c**). Pale yellow solid; 123.8 mg (76% yield); mp 157-158 °C; <sup>1</sup>H NMR (CDCl<sub>3</sub>, 400 MHz): δ 8.08-8.04 (m, 4H, ArH), 7.54 (d, *J* = 7.9 Hz, 4H, ArH), 7.49-7.38 (m, 7H, ArH), 5.93 (t, *J* = 8.6 Hz, 1H, CH), 3.91 (s, 3H, OCH<sub>3</sub>), 3.86 (dd, *J* = 16.4, 9.6 Hz, 1H, CH<sub>2</sub>), 3.33 (dd, *J* = 16.3, 7.8 Hz, 1H, CH<sub>2</sub>); <sup>13</sup>C NMR (CDCl<sub>3</sub>, 100 MHz): 168.5, 166.6, 156.0, 147.6, 146.3, 138.7, 137.8, 130.0, 129.8, 128.9, 128.8, 128.8, 128.6, 127.6, 126.8, 125.3, 114.7, 113.7, 81.1, 52.1, 37.0; HRMS (ESI) *m/z* [M + H]<sup>+</sup> calculated for C<sub>27</sub>H<sub>22</sub>NO<sub>3</sub>: 408.1600, found: 408.1593.

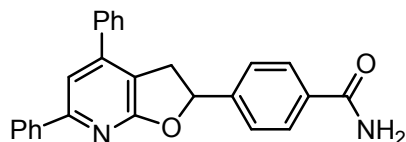

4-(4,6-Diphenyl-2,3-dihydrofuro[2,3-*b*]pyridin-2-yl)benzamide (**3d**). Pale yellow solid; 116.1 mg (74% yield); mp 164-165 °C; <sup>1</sup>H NMR (DMSO-*d*<sub>6</sub>, 400 MHz) δ 8.12 (d, *J* = 7.6 Hz, 2H, ArH), 8.01 (s, 1H), 7.92 (d, *J* = 8.0 Hz, 2H, ArH), 7.76 (d, *J* = 7.4 Hz, 1H, ArH), 7.65 (s, 1H, ArH), 7.55 (d, *J* = 7.8 Hz, 2H, ArH), 7.52 (d, *J* = 7.8 Hz, 2H, ArH), 7.48 (d, *J* = 7.5 Hz, 2H, ArH), 7.44-7.39 (m, 2H, ArH), 5.99 (t, *J* = 8.5 Hz,

1H, CH), 3.94 (dd,  $J = 16.4, 9.4$  Hz, 1H, CH<sub>2</sub>), 3.38 (dd,  $J = 16.3, 8.0$  Hz, 1H, CH<sub>2</sub>); <sup>13</sup>C NMR (DMSO-*d*<sub>6</sub>, 100 MHz):  $\delta$  168.3, 167.5, 154.5, 146.9, 144.2, 138.3, 137.2, 134.0, 128.9, 128.9, 128.9, 128.7, 128.0, 127.9, 126.5, 125.5, 115.8, 113.0, 80.9, 36.2; HRMS (ESI)  $m/z$  [M + H]<sup>+</sup> calculated for C<sub>26</sub>H<sub>21</sub>N<sub>2</sub>O<sub>2</sub>: 393.1603, found: 393.1596.

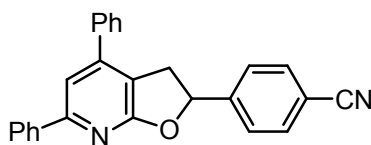

4-(4,6-Diphenyl-2,3-dihydrofuro[2,3-*b*]pyridin-2-yl)benzonitrile (**3e**). Yellow solid; 107.8 mg (72% yield); mp 138-139 °C; <sup>1</sup>H NMR (DMSO, 400 MHz)  $\delta$  8.06 (d,  $J = 7.2$  Hz, 2H, ArH), 7.67 (d,  $J = 8.1$  Hz, 2H, ArH), 7.57 (d,  $J = 8.1$  Hz, 2H, ArH), 7.54-7.39 (m, 9H, ArH), 5.92 (t,  $J = 8.5$  Hz, 1H, CH), 3.89 (dd,  $J = 16.2, 9.6$  Hz, 1H, CH<sub>2</sub>), 3.31 (dd,  $J = 16.2, 7.6$  Hz, 1H, CH<sub>2</sub>); <sup>13</sup>C NMR (DMSO, 100 MHz):  $\delta$  168.3, 156.2, 147.8, 146.6, 138.6, 137.7, 132.5, 129.0, 128.9, 128.9, 128.6, 127.6, 126.8, 126.0, 118.5, 114.3, 113.9, 111.9, 80.5, 36.9; HRMS (ESI)  $m/z$  [M + H]<sup>+</sup> calculated for C<sub>26</sub>H<sub>19</sub>N<sub>2</sub>O: 375.1497, found: 375.1492.

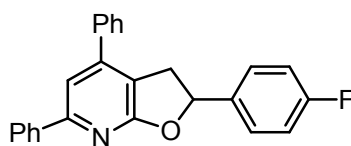

2-(4-Fluorophenyl)-4,6-diphenyl-2,3-dihydrofuro[2,3-*b*]pyridine (**3f**). Yellow solid; 107.2 mg (73% yield); mp 129-130 °C; <sup>1</sup>H NMR (CDCl<sub>3</sub>, 400 MHz):  $\delta$  8.07 (d,  $J = 7.4$  Hz, 2H, ArH), 7.55 (d,  $J = 7.3$  Hz, 2H, ArH), 7.51-7.40 (m, 9H, ArH), 7.07 (td,  $J = 8.4, 1.4$  Hz, 2H, ArH), 5.86 (t,  $J = 8.3$  Hz, 1H, CH), 3.81 (dd,  $J = 16.3, 9.4$  Hz, 1H, CH<sub>2</sub>), 3.35 (dd,  $J = 16.3, 7.8$  Hz, 1H, CH<sub>2</sub>); <sup>13</sup>C NMR (CDCl<sub>3</sub>, 100 MHz):  $\delta$  168.5, 162.5 (d,  $J_{C-F} = 247.3$  Hz), 155.9, 147.5, 138.7, 137.9, 137.0 (d,  $J_{C-F} = 3.2$  Hz), 128.9, 128.8, 128.8, 128.6, 127.7, 127.3 (d,  $J_{C-F} = 8.0$  Hz), 126.8, 115.5 (d,  $J_{C-F} = 21.7$  Hz), 115.0, 113.6, 81.2, 37.1; HRMS (ESI)  $m/z$  [M + H]<sup>+</sup> calculated for C<sub>25</sub>H<sub>19</sub>FNO: 368.1451, found: 368.1450.

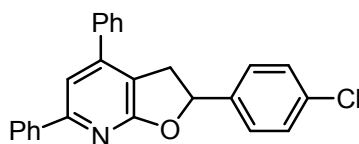

2-(4-Chlorophenyl)-4,6-diphenyl-2,3-dihydrofuro[2,3-*b*]pyridine (**3g**). Yellow solid; 107.4 mg (70% yield); mp 105-106 °C; <sup>1</sup>H NMR (CDCl<sub>3</sub>, 400 MHz): δ 8.07 (d, *J* = 7.5 Hz, 2H, ArH), 7.55 (d, *J* = 7.3 Hz, 2H, ArH), 7.50-7.39 (m, 9H, ArH), 7.35 (d, *J* = 8.4 Hz, 2H, ArH), 5.86 (t, *J* = 8.5 Hz, 1H, CH), 3.82 (dd, *J* = 16.3, 9.4 Hz, 1H, CH<sub>2</sub>), 3.32 (dd, *J* = 16.3, 7.7 Hz, 1H, CH<sub>2</sub>); <sup>13</sup>C NMR (CDCl<sub>3</sub>, 100 MHz): 168.5, 156.0, 147.6, 139.8, 138.7, 137.8, 133.8, 128.9, 128.8, 128.8, 128.8, 128.6, 127.7, 126.9, 126.8, 114.9, 113.6, 81.0, 37.0; HRMS (ESI) *m/z* [M + H]<sup>+</sup> calculated for C<sub>25</sub>H<sub>19</sub>ClNO: 384.1155, found: 384.1162.

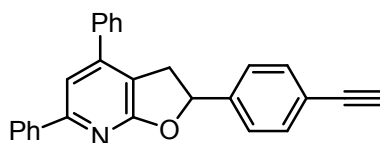

2-(4-Ethynylphenyl)-4,6-diphenyl-2,3-dihydrofuro[2,3-*b*]pyridine (**3h**). Pale yellow solid; 97.1 mg (65% yield); mp 134-135 °C; <sup>1</sup>H NMR (CDCl<sub>3</sub>, 400 MHz): δ 8.07 (dd, *J* = 7.1, 1.5 Hz, 2H, ArH), 7.55 (dd, *J* = 8.2, 1.3 Hz, 2H, ArH), 7.52-7.49 (m, 4H, ArH), 7.47-7.38 (m, 7H, ArH), 5.90 (t, *J* = 8.5 Hz, 1H, CH), 3.85 (dd, *J* = 16.3, 9.5 Hz, 1H, CH<sub>2</sub>), 3.35 (dd, *J* = 16.3, 7.7 Hz, 1H, CH<sub>2</sub>), 3.08 (s, 1H, CH); <sup>13</sup>C NMR (CDCl<sub>3</sub>, 100 MHz): δ 168.6, 156.0, 147.6, 142.0, 138.8, 137.9, 132.5, 128.9, 128.9, 128.8, 128.6, 127.7, 126.9, 125.4, 121.9, 114.9, 113.7, 83.2, 81.3, 77.5, 37.1; HRMS (ESI) *m/z* [M + H]<sup>+</sup> calculated for C<sub>27</sub>H<sub>20</sub>NO: 374.1545, found: 374.1536.

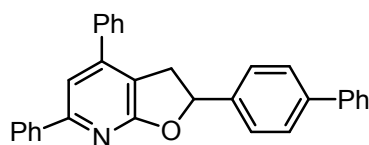

2-([1,1'-Biphenyl]-4-yl)-4,6-diphenyl-2,3-dihydrofuro[2,3-*b*]pyridine (**3i**). Yellow solid; 110.6 mg (65% yield); mp 154-155 °C; <sup>1</sup>H NMR (CDCl<sub>3</sub>, 400 MHz): δ 8.09 (dd, *J* = 7.2, 1.4 Hz, 2H, ArH), 7.62-7.53 (m, 8H, ArH), 7.51-7.38 (m, 9H, ArH), 7.35 (tt, *J* = 7.3, 1.9 Hz, 1H, ArH), 5.95 (t, *J* = 8.5 Hz, 1H, CH), 3.87 (dd, *J* = 16.4, 9.4 Hz, 1H, CH<sub>2</sub>), 3.43 (dd, *J* = 16.4, 7.8 Hz, 1H, CH<sub>2</sub>); <sup>13</sup>C NMR (CDCl<sub>3</sub>, 100 MHz): δ 168.7, 155.9, 147.5, 141.0, 140.6, 140.3, 138.8, 138.0, 128.8, 128.8, 128.8, 128.7, 128.6, 127.7, 127.4, 127.4, 127.1, 126.8, 125.9, 115.2, 113.5, 81.6, 37.1; HRMS (ESI) *m/z* [M + H]<sup>+</sup> calculated for C<sub>31</sub>H<sub>24</sub>NO: 426.1858, found: 426.1851.

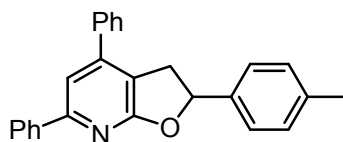

4,6-Diphenyl-2-(p-tolyl)-2,3-dihydrofuro[2,3-*b*]pyridine (**3j**). Pale yellow solid; 72.7 mg (50% yield); mp 66-67 °C; <sup>1</sup>H NMR (CDCl<sub>3</sub>, 400 MHz): δ 8.07 (d, *J* = 7.3 Hz, 2H, ArH), 7.56 (d, *J* = 7.0 Hz, 2H, ArH), 7.50-7.40 (m, 7H, ArH), 7.36 (d, *J* = 7.9 Hz, 2H, ArH), 7.19 (d, *J* = 7.8 Hz, 2H, ArH), 5.87 (t, *J* = 8.5 Hz, 1H, CH), 3.80 (dd, *J* = 16.3, 9.3 Hz, 1H, CH<sub>2</sub>), 3.38 (dd, *J* = 16.3, 7.8 Hz, 1H, CH<sub>2</sub>), 2.36 (s, 3H, CH<sub>3</sub>); <sup>13</sup>C NMR (CDCl<sub>3</sub>, 100 MHz): δ 168.8, 155.9, 147.4, 138.9, 138.3, 138.1, 137.9, 129.3, 128.8, 128.8, 128.7, 128.6, 127.7, 126.8, 125.5, 115.4, 113.4, 81.8, 37.1, 21.1; HRMS (ESI) *m/z* [M + H]<sup>+</sup> calculated for C<sub>26</sub>H<sub>22</sub>NO: 364.1701, found: 364.1695.

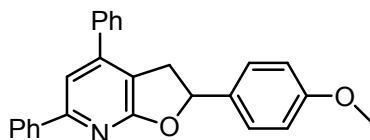

2-(4-Methoxyphenyl)-4,6-diphenyl-2,3-dihydrofuro[2,3-*b*]pyridine (**3k**). Yellow solid; 60.7 mg (40% yield); mp 122-123 °C; <sup>1</sup>H NMR (CDCl<sub>3</sub>, 400 MHz): δ 8.06 (dd, *J* = 7.2, 1.3 Hz, 2H, ArH), 7.57 (dd, *J* = 6.9, 1.5 Hz, 2H, ArH), 7.50-7.42 (m, 6H, ArH), 7.41-7.38 (m, 3H, ArH), 6.91 (d, *J* = 8.7 Hz, 2H, ArH), 5.84 (t, *J* = 8.6 Hz, 1H, CH), 3.81 (s, 3H, OCH<sub>3</sub>), 3.78 (dd, *J* = 16.4, 9.3 Hz, 1H, CH<sub>2</sub>), 3.38 (dd, *J* = 16.4, 7.9 Hz, 1H, CH<sub>2</sub>); <sup>13</sup>C NMR (CDCl<sub>3</sub>, 100 MHz): δ 168.7, 159.5, 155.8, 147.4, 138.9, 138.1, 133.2, 128.8, 128.8, 128.7, 128.6, 127.7, 127.0, 126.8, 115.4, 114.0, 113.4, 81.8, 55.3, 37.0; HRMS (ESI) *m/z* [M + H]<sup>+</sup> calculated for C<sub>26</sub>H<sub>22</sub>NO<sub>2</sub>: 380.1651, found: 380.1650.

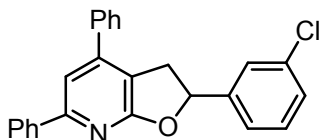

2-(3-Chlorophenyl)-4,6-diphenyl-2,3-dihydrofuro[2,3-*b*]pyridine (**3l**). Pale yellow solid; 104.5 mg (68% yield); mp 87-88 °C; <sup>1</sup>H NMR (CDCl<sub>3</sub>, 400 MHz): δ 8.06 (d, *J* = 7.4 Hz, 2H, ArH), 7.55 (d, *J* = 7.4 Hz, 2H, ArH), 7.51-7.39 (m, 8H, ArH), 7.35-7.30 (m, 3H, ArH), 5.87 (t, *J* = 8.6 Hz, 1H, CH), 3.85 (dd, *J* = 16.3, 9.5 Hz, 1H, CH<sub>2</sub>), 3.35 (dd, *J* = 16.3, 7.8 Hz, 1H, CH<sub>2</sub>); <sup>13</sup>C NMR (CDCl<sub>3</sub>, 100 MHz): δ 168.5, 156.0, 147.6, 143.4, 138.7, 137.8, 134.6, 130.0, 128.9, 128.9, 128.8, 128.6, 128.2, 127.7, 126.8,

125.6, 123.5, 114.7, 113.7, 80.8, 37.0; HRMS (ESI)  $m/z$   $[M + H]^+$  calculated for  $C_{25}H_{19}ClNO$ : 384.1155, found: 384.1160.

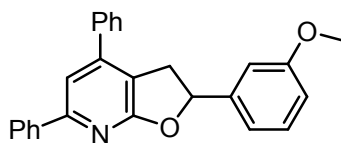

2-(3-Methoxyphenyl)-4,6-diphenyl-2,3-dihydrofuro[2,3-*b*]pyridine (**3m**). White solid; 91.0 mg (60% yield); mp 115-116 °C;  $^1H$  NMR ( $CDCl_3$ , 400 MHz):  $\delta$  8.07 (dd,  $J = 7.2$ , 1.4 Hz, 2H, ArH), 7.56 (dd,  $J = 8.4$ , 1.6 Hz, 2H, ArH), 7.51-7.39 (m, 7H, ArH), 7.30 (t,  $J = 7.9$  Hz, 1H, ArH), 7.05-7.02 (m, 2H, ArH), 6.86 (dd,  $J = 8.1$ , 2.0 Hz, 1H, ArH), 5.88 (t,  $J = 8.6$  Hz, 1H, CH), 3.82 (dd,  $J = 16.3$ , 9.4 Hz, 1H,  $CH_2$ ), 3.81 (s, 3H,  $OCH_3$ ), 3.38 (dd,  $J = 16.3$ , 8.0 Hz, 1H,  $CH_2$ );  $^{13}C$  NMR ( $CDCl_3$ , 100 MHz):  $\delta$  168.7, 159.8, 155.9, 147.4, 143.0, 138.8, 138.0, 129.7, 128.8, 128.8, 128.7, 128.6, 127.7, 126.8, 117.6, 115.2, 113.6, 113.5, 110.8, 81.6, 55.3, 37.1; HRMS (ESI)  $m/z$   $[M + H]^+$  calculated for  $C_{26}H_{22}NO_2$ : 380.1651, found: 380.1648.

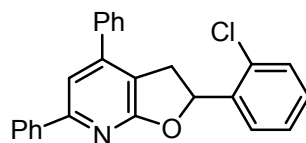

2-(2-Chlorophenyl)-4,6-diphenyl-2,3-dihydrofuro[2,3-*b*]pyridine (**3n**). Yellow solid; 112.1 mg (73% yield); mp 163-164 °C;  $^1H$  NMR ( $CDCl_3$ , 400 MHz):  $\delta$  8.07 (d,  $J = 7.2$  Hz, 2H, ArH), 7.69 (dd,  $J = 7.4$ , 1.7 Hz, 1H, ArH), 7.54 (dd,  $J = 7.0$ , 1.5 Hz, 2H, ArH), 7.49-7.37 (m, 8H, ArH), 7.31-7.22 (m, 2H, ArH), 6.17 (dd,  $J = 9.5$ , 7.1 Hz, 1H, CH), 4.04 (dd,  $J = 16.6$ , 9.6 Hz, 1H,  $CH_2$ ), 3.23 (dd,  $J = 16.6$ , 7.0 Hz, 1H,  $CH_2$ );  $^{13}C$  NMR ( $CDCl_3$ , 100 MHz):  $\delta$  168.6, 156.0, 147.8, 139.5, 138.8, 137.9, 130.9, 129.5, 129.0, 128.9, 128.9, 128.8, 128.6, 127.7, 127.1, 126.9, 126.3, 114.8, 113.8, 78.9, 36.2; HRMS (ESI)  $m/z$   $[M + H]^+$  calculated for  $C_{25}H_{19}ClNO$ : 384.1155, found: 384.1163.

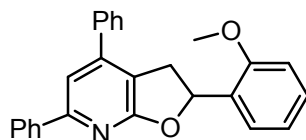

2-(2-Methoxyphenyl)-4,6-diphenyl-2,3-dihydrofuro[2,3-*b*]pyridine (**3o**). Pale yellow solid; 75.9 mg (50% yield); mp 152-153 °C;  $^1H$  NMR ( $CDCl_3$ , 400 MHz):  $\delta$  8.08 (dd,  $J = 7.2$ , 1.4 Hz, 2H, ArH), 7.59 (dd,  $J = 7.6$ , 0.9 Hz, 1H, ArH), 7.55 (dd,  $J = 7.0$ , 1.5



Hz, 2H, ArH), 7.49-7.38 (m, 7H, ArH), 7.28 (td,  $J = 7.8, 1.3$  Hz, 1H, ArH), 6.97 (t,  $J = 7.3$  Hz, 1H, ArH), 6.90 (d,  $J = 8.2$  Hz, 1H, ArH), 6.13 (dd,  $J = 9.3, 7.4$  Hz, 1H, CH), 3.90 (dd,  $J = 16.6, 9.5$  Hz, 1H, CH<sub>2</sub>), 3.84 (s, 3H, OCH<sub>3</sub>), 3.22 (dd,  $J = 16.6, 7.2$  Hz, 1H, CH<sub>2</sub>); <sup>13</sup>C NMR (CDCl<sub>3</sub>, 100 MHz): δ 168.8, 155.6, 155.5, 147.4, 138.9, 138.1, 130.0, 128.7, 128.7, 128.5, 128.5, 128.5, 127.7, 126.8, 125.5, 120.5, 115.7, 113.3, 110.1, 77.9, 55.2, 36.2; HRMS (ESI)  $m/z$  [M + H]<sup>+</sup> calculated for C<sub>26</sub>H<sub>22</sub>NO<sub>2</sub>: 380.1651, found: 380.1644.

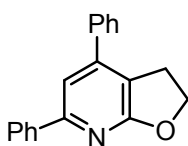

4,6-Diphenyl-2,3-dihydrofuro[2,3-*b*]pyridine (**3p**). Yellow viscous liquid; 28.4 mg (26% yield); <sup>1</sup>H NMR (CDCl<sub>3</sub>, 400 MHz): δ 8.03 (dd,  $J = 7.9, 1.4$  Hz, 2H, ArH), 7.57 (dd,  $J = 7.8, 1.5$  Hz, 1H, ArH), 7.50 (t,  $J = 7.3$  Hz, 2H, ArH), 7.46-7.37 (m, 5H, ArH), 4.69 (t,  $J = 8.5$  Hz, 2H, CH<sub>2</sub>), 3.41 (t,  $J = 8.5$  Hz, 2H, CH<sub>2</sub>); <sup>13</sup>C NMR (CDCl<sub>3</sub>, 100 MHz): 169.3, 155.6, 147.5, 138.9, 138.2, 128.8, 128.8, 128.7, 128.6, 127.7, 126.8, 115.4, 113.2, 69.1, 28.2; HRMS (ESI)  $m/z$  [M + H]<sup>+</sup> calculated for C<sub>19</sub>H<sub>16</sub>NO: 274.1232, found: 274.1231.

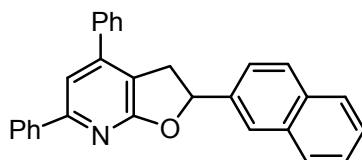

2-(Naphthalen-2-yl)-4,6-diphenyl-2,3-dihydrofuro[2,3-*b*]pyridine (**3s**). Yellow solid; 123.0 mg (77% yield); mp 76-77 °C; <sup>1</sup>H NMR (CDCl<sub>3</sub>, 400 MHz): δ 8.09 (dd,  $J = 7.1, 1.4$  Hz, 2H, ArH), 7.97 (s, 1H, ArH), 7.88 (d,  $J = 8.6$  Hz, 1H, ArH), 7.86-7.83 (m, 2H, ArH), 7.58-7.39 (m, 12H, ArH), 6.07 (t,  $J = 8.5$  Hz, 1H, CH), 3.92 (dd,  $J = 16.4, 9.5$  Hz, 1H, CH<sub>2</sub>), 3.47 (dd,  $J = 16.4, 7.8$  Hz, 1H, CH<sub>2</sub>); <sup>13</sup>C NMR (CDCl<sub>3</sub>, 100 MHz): δ 168.8, 155.9, 147.5, 138.8, 138.6, 138.0, 133.1, 133.0, 128.8, 128.8, 128.7, 128.7, 128.6, 128.0, 127.7, 127.7, 126.8, 126.4, 126.1, 124.3, 123.2, 115.2, 113.5, 81.8, 37.1; HRMS (ESI)  $m/z$  [M + H]<sup>+</sup> calculated for C<sub>29</sub>H<sub>22</sub>NO: 400.1701, found: 400.1696.

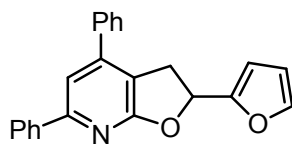

2-(Furan-2-yl)-4,6-diphenyl-2,3-dihydrofuro[2,3-*b*]pyridine (**3t**). Yellow viscous liquid; 76.1 mg (56% yield); <sup>1</sup>H NMR (CDCl<sub>3</sub>, 400 MHz): δ 8.05 (d, *J* = 7.3 Hz, 2H, ArH), 7.59 (d, *J* = 7.1 Hz, 2H, ArH), 7.51 (t, *J* = 7.2 Hz, 2H, ArH), 7.47-7.31 (m, 6H, ArH), 6.48 (d, *J* = 2.8 Hz, 1H, ArH), 6.37 (s, 1H, ArH), 5.85 (t, *J* = 8.4 Hz, 1H, CH), 3.68 (d, *J* = 8.4 Hz, 2H, CH<sub>2</sub>); <sup>13</sup>C NMR (CDCl<sub>3</sub>, 100 MHz): δ 168.1, 155.8, 152.2, 147.4, 143.2, 138.8, 138.0, 128.9, 128.8, 128.7, 128.5, 127.7, 126.8, 115.0, 113.5, 110.4, 108.7, 75.0, 32.9; HRMS (ESI) *m/z* [M + H]<sup>+</sup> calculated for C<sub>23</sub>H<sub>18</sub>NO<sub>2</sub>: 340.1338, found: 340.1332.

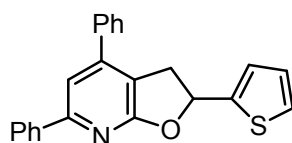

4,6-Diphenyl-2-(thiophen-2-yl)-2,3-dihydrofuro[2,3-*b*]pyridine (**3u**). Pale yellow solid; 82.5 mg (58% yield); mp 122-123 °C; <sup>1</sup>H NMR (CDCl<sub>3</sub>, 400 MHz): δ 8.06 (td, *J* = 7.0, 1.5 Hz, 2H, ArH), 7.58 (td, *J* = 8.2, 1.5 Hz, 2H, ArH), 7.51 (tt, *J* = 7.3, 1.5 Hz, 2H, ArH), 7.48-7.43 (m, 4H, ArH), 7.40 (tt, *J* = 7.2, 1.4 Hz, 1H, ArH), 7.31 (dd, *J* = 5.0, 1.2 Hz, 1H, ArH), 7.16 (dt, *J* = 3.4, 0.9 Hz, 1H, ArH), 7.00 (dd, *J* = 5.0, 3.6 Hz, 2H, ArH), 6.09 (dd, *J* = 8.5, 7.8 Hz, 1H, CH), 3.82 (dd, *J* = 16.4, 9.1 Hz, 1H, CH<sub>2</sub>), 3.55 (dd, *J* = 16.3, 7.5 Hz, 1H, CH<sub>2</sub>); <sup>13</sup>C NMR (CDCl<sub>3</sub>, 100 MHz): δ 168.0, 156.0, 147.5, 143.7, 138.7, 137.9, 128.9, 128.8, 128.7, 128.5, 127.7, 126.8, 126.8, 125.7, 125.3, 114.9, 113.6, 78.0, 37.0; HRMS (ESI) *m/z* [M + H]<sup>+</sup> calculated for C<sub>23</sub>H<sub>18</sub>NOS: 356.1109, found: 356.1102.

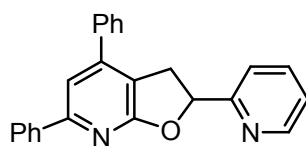

4,6-Diphenyl-2-(pyridin-2-yl)-2,3-dihydrofuro[2,3-*b*]pyridine (**3v**). Yellow solid; 112.1 mg (80% yield); mp 127-128 °C; <sup>1</sup>H NMR (CDCl<sub>3</sub>, 400 MHz): δ 8.60 (d, *J* = 4.7 Hz, 1H, ArH), 8.06 (dd, *J* = 7.1, 1.4 Hz, 2H, ArH), 7.75-7.69 (m, 2H, ArH), 7.58 (dd, *J* = 6.9, 1.5 Hz, 2H, ArH), 7.50-7.38 (m, 7H, ArH), 7.23 (tt, *J* = 6.7, 1.6 Hz, 1H, ArH), 5.99 (dd, *J* = 9.8, 6.8 Hz, 1H, CH), 3.95 (dd, *J* = 16.6, 9.9 Hz, 1H, CH<sub>2</sub>), 3.66 (dd, *J* = 16.6, 6.8 Hz, 1H, CH<sub>2</sub>); <sup>13</sup>C NMR (CDCl<sub>3</sub>, 100 MHz): δ 168.6, 160.3, 155.8, 149.3,

147.6, 138.8, 137.8, 136.9, 128.8, 128.8, 128.7, 128.6, 127.7, 126.8, 122.8, 120.3, 115.0, 113.7, 81.5, 35.1; HRMS (ESI)  $m/z$   $[M + H]^+$  calculated for  $C_{24}H_{19}N_2O$ : 351.1497, found: 351.1497.

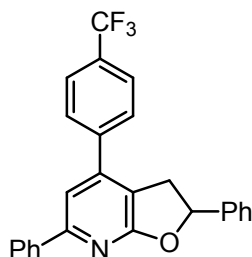

2,6-Diphenyl-4-(4-(trifluoromethyl)phenyl)-2,3-dihydrofuro[2,3-*b*]pyridine (**3w**). Yellow solid; 83.4 mg (50% yield); mp 173-174 °C;  $^1H$  NMR ( $CDCl_3$ , 400 MHz):  $\delta$  8.06 (d,  $J = 7.2$  Hz, 2H, ArH), 7.74 (d,  $J = 8.2$  Hz, 2H, ArH), 7.66 (d,  $J = 8.1$  Hz, 2H, ArH), 7.49-7.37 (m, 8H, ArH), 7.33 (t,  $J = 7.2$  Hz, 1H, ArH), 5.92 (t,  $J = 8.5$  Hz, 1H, CH), 3.82 (dd,  $J = 16.4, 9.4$  Hz, 1H,  $CH_2$ ), 3.37 (dd,  $J = 16.4, 7.8$  Hz, 1H,  $CH_2$ );  $^{13}C$  NMR ( $CDCl_3$ , 100 MHz):  $\delta$  168.8, 156.3, 146.0, 141.6, 141.1, 138.5, 130.7 (q,  $J_{C-F} = 32.5$  Hz), 129.1, 128.7, 128.6, 128.2, 128.1, 126.8, 125.8 (q,  $J_{C-F} = 3.5$  Hz), 125.4, 123.9 (q,  $J_{C-F} = 271.1$  Hz), 115.5, 113.2, 81.8, 36.9; HRMS (ESI)  $m/z$   $[M + H]^+$  calculated for  $C_{26}H_{19}F_3NO$ : 418.1419, found: 418.1425

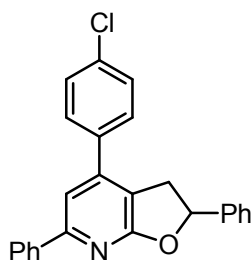

4-(4-Chlorophenyl)-2,6-diphenyl-2,3-dihydrofuro[2,3-*b*]pyridine (**3x**). Pale yellow solid; 95.0 mg (62% yield); mp 111-112 °C;  $^1H$  NMR ( $CDCl_3$ , 400 MHz):  $\delta$  8.06 (d,  $J = 7.2$  Hz, 2H, ArH), 7.49-7.38 (m, 12H, ArH), 7.33 (t,  $J = 7.2$  Hz, 1H, ArH), 5.90 (t,  $J = 8.5$  Hz, 1H, CH), 3.79 (dd,  $J = 16.3, 9.4$  Hz, 1H,  $CH_2$ ), 3.35 (dd,  $J = 16.3, 7.8$  Hz, 1H,  $CH_2$ );  $^{13}C$  NMR ( $CDCl_3$ , 100 MHz):  $\delta$  168.8, 156.0, 146.2, 141.1, 138.6, 136.4, 134.8, 129.0, 129.0, 128.9, 128.7, 128.6, 128.1, 126.8, 125.4, 115.1, 113.1, 81.7, 37.0; HRMS (ESI)  $m/z$   $[M + H]^+$  calculated for  $C_{25}H_{19}ClNO$ : 384.1155, found: 384.1160.

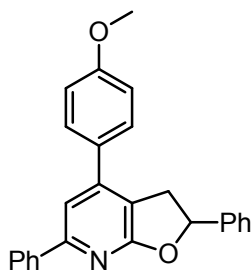

4-(4-Methoxyphenyl)-2,6-diphenyl-2,3-dihydrofuro[2,3-*b*]pyridine (**3y**). Yellow solid; 83.4 mg (55% yield); mp 75-76 °C; <sup>1</sup>H NMR (CDCl<sub>3</sub>, 400 MHz): δ 8.07 (dd, *J* = 7.2, 1.4 Hz, 2H, ArH), 7.51 (d, *J* = 8.8 Hz, 2H, ArH), 7.49-7.44 (m, 4H, ArH), 7.41-7.37 (m, 11H, ArH), 7.32 (tt, *J* = 7.2, 2.4 Hz, 1H, ArH), 7.00 (dd, *J* = 8.8 Hz, 2H, ArH), 5.89 (t, *J* = 8.5 Hz, 1H, CH), 3.86 (s, 3H, OCH<sub>3</sub>), 3.83 (dd, *J* = 16.2, 9.4 Hz, 1H, CH<sub>2</sub>), 3.38 (dd, *J* = 16.2, 7.8 Hz, 1H, CH<sub>2</sub>); <sup>13</sup>C NMR (CDCl<sub>3</sub>, 100 MHz): δ 168.8, 160.0, 155.8, 147.0, 141.4, 139.0, 130.3, 129.0, 128.7, 128.6, 128.6, 128.0, 126.8, 125.4, 114.7, 114.2, 113.2, 81.7, 55.4, 37.3; HRMS (ESI) *m/z* [M + H]<sup>+</sup> calculated for C<sub>26</sub>H<sub>22</sub>NO<sub>2</sub>: 380.1651, found: 380.1648.

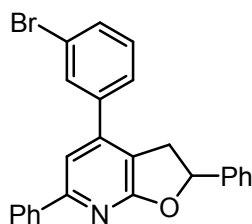

4-(3-Bromophenyl)-2,6-diphenyl-2,3-dihydrofuro[2,3-*b*]pyridine (**3z**). White solid; 114.7mg (66% yield); mp 125-126 °C; <sup>1</sup>H NMR (CDCl<sub>3</sub>, 400 MHz): δ 8.13 (d, *J* = 7.2 Hz, 2H, ArH), 7.69 (s, 1H, ArH), 7.56 (d, *J* = 7.7 Hz, 1H, ArH), 7.47-7.33 (m, 4H, ArH), 5.91 (t, *J* = 8.5 Hz, 1H, CH), 3.82 (dd, *J* = 16.4, 9.4 Hz, 1H, CH<sub>2</sub>), 3.36 (dd, *J* = 16.4, 7.8 Hz, 1H, CH<sub>2</sub>); <sup>13</sup>C NMR (CDCl<sub>3</sub>, 100 MHz): δ 168.8, 156.2, 146.0, 141.1, 140.1, 138.6, 131.7, 130.7, 130.4, 129.0, 128.7, 128.6, 128.2, 126.9, 126.3, 125.5, 123.0, 115.3, 113.2, 81.9, 37.0; HRMS (ESI) *m/z* [M + H]<sup>+</sup> calculated for C<sub>25</sub>H<sub>19</sub>BrNO: 428.0650, found: 428.0652.

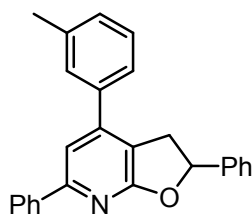

2,6-Diphenyl-4-(*m*-tolyl)-2,3-dihydrofuro[2,3-*b*]pyridine (**3aa**). Pale yellow viscous liquid; 95.9mg (67% yield); <sup>1</sup>H NMR (CDCl<sub>3</sub>, 400 MHz): δ 8.02 (d, *J* = 7.5 Hz, 2H, ArH), 7.40 (t, *J* = 7.3 Hz, 4H, ArH), 7.37-7.24 (m, 8H, ArH), 7.19-7.17 (m, 1H, ArH), 5.82 (t, *J* = 8.6 Hz, 1H, CH), 3.76 (dd, *J* = 16.3, 9.4 Hz, 1H, CH<sub>2</sub>), 3.31 (dd, *J* = 16.3, 7.8 Hz, 1H, CH<sub>2</sub>), 2.37 (s, 3H, CH<sub>3</sub>); <sup>13</sup>C NMR (CDCl<sub>3</sub>, 100 MHz): δ 168.7, 155.8, 147.6, 141.3, 138.9, 138.5, 137.9, 129.4, 128.8, 128.7, 128.6, 128.5, 128.3, 128.0, 126.8, 125.4, 124.8, 115.2, 113.5, 81.8, 37.1, 21.5; HRMS (ESI) *m/z* [M + H]<sup>+</sup> calculated for C<sub>26</sub>H<sub>22</sub>NO: 364.1701, found: 364.1699.

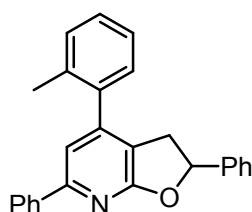

2,6-Diphenyl-4-(*o*-tolyl)-2,3-dihydrofuro[2,3-*b*]pyridine (**3ab**). Pale yellow solid; 88.7 mg (61% yield); mp 44-45 °C; <sup>1</sup>H NMR (CDCl<sub>3</sub>, 400 MHz): δ 8.04 (d, *J* = 7.4 Hz, 2H, ArH), 7.46-7.30 (m, 10H, ArH), 7.24 (d, *J* = 8.1 Hz, 2H, ArH), 7.19 (d, *J* = 7.3 Hz, 1H, ArH), 5.89 (t, *J* = 8.6 Hz, 1H, CH), 3.52 (dd, *J* = 16.4, 9.5 Hz, 1H, CH<sub>2</sub>), 3.07 (dd, *J* = 16.4, 7.8 Hz, 1H, CH<sub>2</sub>), 2.23 (s, 3H, CH<sub>3</sub>); <sup>13</sup>C NMR (CDCl<sub>3</sub>, 100 MHz): δ 168.3, 155.3, 148.5, 141.4, 138.8, 137.9, 134.9, 130.5, 128.8, 128.7, 128.6, 128.4, 128.3, 128.0, 126.8, 125.9, 125.4, 116.7, 114.8, 81.8, 36.4, 19.8; HRMS (ESI) *m/z* [M + H]<sup>+</sup> calculated for C<sub>26</sub>H<sub>22</sub>NO: 364.1701, found: 364.1696.

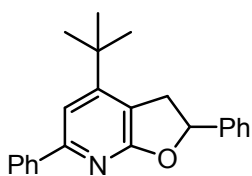

4-(Tert-butyl)-2,6-diphenyl-2,3-dihydrofuro[2,3-*b*]pyridine (**3ac**). Yellow viscous liquid; 54.0mg (41% yield); <sup>1</sup>H NMR (CDCl<sub>3</sub>, 400 MHz): δ 8.02 (d, *J* = 7.2 Hz, 2H, ArH), 7.48-7.33 (m, 9H, ArH), 5.81 (t, *J* = 8.7 Hz, 1H, CH), 3.88 (dd, *J* = 16.0, 9.4 Hz, 1H, CH<sub>2</sub>), 3.38 (dd, *J* = 16.0, 8.2 Hz, 1H, CH<sub>2</sub>), 1.39 (s, 9H, 3×CH<sub>3</sub>); <sup>13</sup>C NMR (CDCl<sub>3</sub>, 100 MHz): δ 168.9, 157.9, 155.4, 141.5, 139.3, 128.6, 128.6, 128.5, 128.0, 126.8, 125.5, 114.5, 111.4, 81.1, 38.8, 35.7, 29.7; HRMS (ESI) *m/z* [M + H]<sup>+</sup>

calculated for C<sub>23</sub>H<sub>24</sub>NO: 330.4428, found: 330.4421.

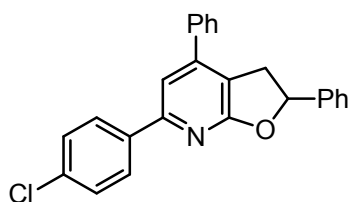

6-(4-Chlorophenyl)-2,4-diphenyl-2,3-dihydrofuro[2,3-*b*]pyridine (**3ad**). Yellow solid; 99.8 mg (65% yield); mp 118-119 °C; <sup>1</sup>H NMR (CDCl<sub>3</sub>, 400 MHz): δ 8.02 (d, *J* = 8.6 Hz, 2H, ArH), 7.55 (dd, *J* = 8.4, 1.5 Hz, 2H, ArH), 7.51-7.37 (m, 10H, ArH), 7.32 (tt, *J* = 7.2, 2.4 Hz, 1H, ArH), 5.91 (t, *J* = 8.65 Hz, 1H, CH), 3.84 (dd, *J* = 16.4, 9.4 Hz, 1H, CH<sub>2</sub>), 3.39 (dd, *J* = 16.4, 7.8 Hz, 1H, CH<sub>2</sub>); <sup>13</sup>C NMR (CDCl<sub>3</sub>, 100 MHz): δ 168.7, 154.5, 147.5, 141.1, 137.7, 137.2, 134.8, 128.8, 128.8, 128.7, 128.6, 128.1, 128.0, 127.6, 125.4, 115.6, 113.2, 81.8, 37.0; HRMS (ESI) *m/z* [M + H]<sup>+</sup> calculated for C<sub>25</sub>H<sub>19</sub>ClNO: 384.1155, found: 384.1159.

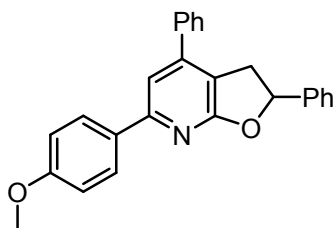

6-(4-Methoxyphenyl)-2,4-diphenyl-2,3-dihydrofuro[2,3-*b*]pyridine (**3ae**). Yellow solid; 78.9 mg (52% yield); mp 132-133 °C; <sup>1</sup>H NMR (CDCl<sub>3</sub>, 400 MHz): δ 8.04 (d, *J* = 8.7 Hz, 2H, ArH), 7.55 (d, *J* = 7.2 Hz, 2H, ArH), 7.50-7.35 (m, 8H, ArH), 7.32 (t, *J* = 7.1 Hz, 1H, ArH), 6.99 (d, *J* = 8.7 Hz, 2H, ArH), 5.88 (t, *J* = 8.6 Hz, 1H, CH), 3.86 (s, 3H, OCH<sub>3</sub>), 3.81 (dd, *J* = 16.2, 9.5 Hz, 1H, CH<sub>2</sub>), 3.37 (dd, *J* = 16.2, 7.8 Hz, 1H, CH<sub>2</sub>); <sup>13</sup>C NMR (CDCl<sub>3</sub>, 100 MHz): δ 168.6, 160.3, 155.6, 147.4, 141.4, 138.1, 131.5, 128.8, 128.6, 128.6, 128.1, 128.0, 127.7, 125.4, 114.3, 113.9, 112.6, 81.7, 55.3, 37.1; HRMS (ESI) *m/z* [M + H]<sup>+</sup> calculated for C<sub>26</sub>H<sub>22</sub>NO<sub>2</sub>: 380.1651, found: 380.1646.

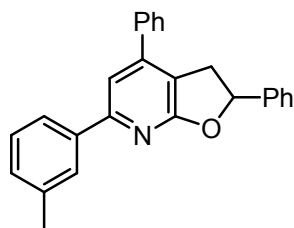

2,4-Diphenyl-6-(*m*-tolyl)-2,3-dihydrofuro[2,3-*b*]pyridine (**3af**). Pale yellow viscous

liquid; 88.7 mg (61% yield);  $^1\text{H}$  NMR ( $\text{CDCl}_3$ , 400 MHz):  $\delta$  8.04 (d,  $J = 7.4$  Hz, 2H, ArH), 7.44-7.23 (m, 12H, ArH), 7.19 (d,  $J = 7.3$  Hz, 1H, ArH), 5.89 (t,  $J = 8.6$  Hz, 1H, CH), 3.52 (dd,  $J = 16.4, 9.5$  Hz, 1H,  $\text{CH}_2$ ), 3.07 (dd,  $J = 16.4, 7.8$  Hz, 1H,  $\text{CH}_2$ ), 2.23 (s, 3H,  $\text{CH}_3$ );  $^{13}\text{C}$  NMR ( $\text{CDCl}_3$ , 100 MHz):  $\delta$  168.3, 155.3, 148.5, 141.4, 138.8, 137.9, 134.9, 130.5, 128.8, 128.7, 128.6, 128.4, 128.3, 128.0, 126.8, 125.9, 125.4, 116.7, 114.8, 81.8, 36.4, 19.8; HRMS (ESI)  $m/z$   $[\text{M} + \text{H}]^+$  calculated for  $\text{C}_{26}\text{H}_{22}\text{NO}$ : 364.1701, found: 364.1697.

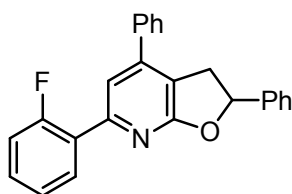

6-(2-Fluorophenyl)-2,4-diphenyl-2,3-dihydrofuro[2,3-*b*]pyridine (**3ag**). Pale yellow solid; 79.5 mg (54% yield); mp 92-93 °C;  $^1\text{H}$  NMR ( $\text{CDCl}_3$ , 400 MHz):  $\delta$  8.14 (td,  $J = 7.9, 1.8$  Hz, 1H, ArH), 7.57-7.55 (m, 3H, ArH), 7.50-7.31 (m, 9H, ArH), 7.27 (td,  $J = 7.6, 1.0$  Hz, 1H, ArH), 7.16 (ddd,  $J = 11.6, 8.2, 0.9$  Hz, 1H, ArH), 5.91 (t,  $J = 8.6$  Hz, 1H, CH), 3.86 (dd,  $J = 16.4, 9.4$  Hz, 1H,  $\text{CH}_2$ ), 3.41 (dd,  $J = 16.4, 7.8$  Hz, 1H,  $\text{CH}_2$ );  $^{13}\text{C}$  NMR ( $\text{CDCl}_3$ , 100 MHz):  $\delta$  168.6, 160.4 (d,  $J_{\text{C-F}} = 248.4$  Hz), 151.1, 151.1 (d,  $J_{\text{C-F}} = 2.7$  Hz), 147.2, 141.2, 137.8, 131.0 (d,  $J_{\text{C-F}} = 2.7$  Hz), 130.1 (d,  $J_{\text{C-F}} = 8.7$  Hz), 128.8, 128.7, 128.7, 128.1, 127.8, 126.9 (d,  $J_{\text{C-F}} = 10.9$  Hz), 125.4, 124.3 (d,  $J_{\text{C-F}} = 3.4$  Hz), 117.6 (d,  $J_{\text{C-F}} = 10.7$  Hz), 116.1 (d,  $J_{\text{C-F}} = 23.3$  Hz), 115.6, 81.7, 37.2; HRMS (ESI)  $m/z$   $[\text{M} + \text{H}]^+$  calculated for  $\text{C}_{25}\text{H}_{19}\text{FNO}$ : 368.1451, found: 368.1448.

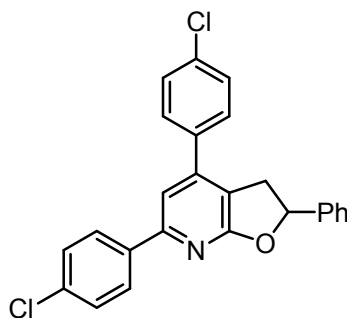

4,6-Bis(4-chlorophenyl)-2-phenyl-2,3-dihydrofuro[2,3-*b*]pyridine (**3ah**). Yellow solid; 110.3 mg (66% yield); mp 157-158 °C;  $^1\text{H}$  NMR ( $\text{CDCl}_3$ , 400 MHz):  $\delta$  8.00 (d,  $J = 7.6$  Hz, 2H, ArH), 7.49-7.33 (m, 12H, ArH), 5.90 (t,  $J = 8.5$  Hz, 1H, CH), 3.80 (dd,  $J = 16.3, 9.4$  Hz, 1H,  $\text{CH}_2$ ), 3.35 (dd,  $J = 16.3, 7.7$  Hz, 1H,  $\text{CH}_2$ );  $^{13}\text{C}$  NMR ( $\text{CDCl}_3$ , 100

MHz):  $\delta$  168.8, 154.8, 146.4, 141.0, 137.1, 136.2, 135.0, 135.0, 129.1, 129.0, 128.8, 128.7, 128.2, 128.1, 125.4, 115.5, 113.0, 81.9, 37.0; HRMS (ESI)  $m/z$   $[M + H]^+$  calculated for  $C_{25}H_{18}Cl_2NO$ : 418.0765, found: 418.0770.

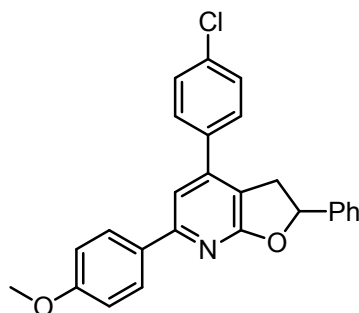

4-(4-Chlorophenyl)-6-(4-methoxyphenyl)-2-phenyl-2,3-dihydrofuro[2,3-*b*]pyridine (**3ai**). Brick red solid; 99.3 mg (60% yield); mp 126-127 °C;  $^1H$  NMR ( $CDCl_3$ , 400 MHz):  $\delta$  8.01 (d,  $J = 8.7$  Hz, 1H, ArH), 7.49-7.43 (m, 6H, ArH), 7.39 (t,  $J = 7.4$  Hz, 1H, ArH), 7.33 (d,  $J = 7.2$  Hz, 1H, ArH), 7.31 (s, 1H, ArH), 6.98 (d,  $J = 8.7$  Hz, 1H, ArH), 5.89 (t,  $J = 8.5$  Hz, 1H, CH), 3.86 (s, 3H,  $OCH_3$ ), 3.78 (dd,  $J = 16.3, 9.4$  Hz, 1H,  $CH_2$ ), 3.34 (dd,  $J = 16.2, 7.8$  Hz, 1H,  $CH_2$ );  $^{13}C$  NMR ( $CDCl_3$ , 100 MHz):  $\delta$  168.7, 160.4, 155.8, 146.2, 141.2, 136.6, 134.8, 131.3, 129.0, 129.0, 128.7, 128.1, 128.1, 125.4, 114.2, 114.0, 112.3, 81.8, 55.3, 37.1; HRMS (ESI)  $m/z$   $[M + H]^+$  calculated for  $C_{26}H_{21}ClNO_2$ : 414.1261, found: 414.1260.

## Experimental Procedures and Data for Compounds 5

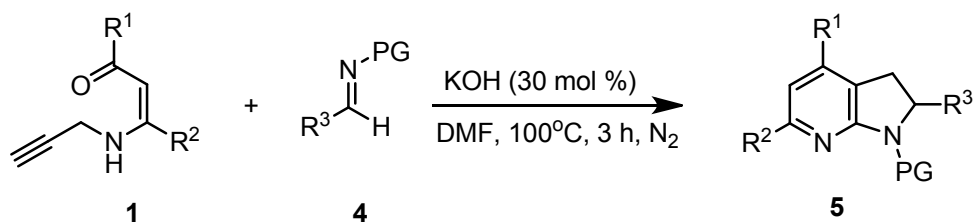

A mixture of *N*-propargylic  $\beta$ -enaminones **1** (0.4 mmol), *N*-sulfonyl imines **4** (0.8 mmol), and KOH (8 mg, 0.12 mmol, 0.3 equiv) in DMF (3 mL) was stirred at 100 °C under  $N_2$  for 3 h. After **1** was disappeared completely (monitored by TLC), the residue dissolved in  $H_2O$  (10 mL) and extracted with EtOAc (3 x 10 mL). The combined EtOAc extracts were dried over  $Na_2SO_4$  and concentrated. Then solvent was evaporated and the residue was purified by chromatography (silica gel, 2%



EtOAc in PE) to give **5**.

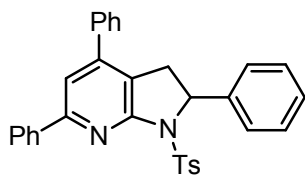

2,4,6-Triphenyl-1-tosyl-2,3-dihydro-1*H*-pyrrolo[2,3-*b*]pyridine (**5a**). Yellow solid; 130.7 mg (65% yield); mp 209-210 °C; <sup>1</sup>H NMR (CDCl<sub>3</sub>, 400 MHz): δ 8.08 (d, *J* = 7.3 Hz, 2H, ArH), 7.70 (d, *J* = 8.2 Hz, 2H, ArH), 7.49 (t, *J* = 7.4 Hz, 2H, ArH), 7.44-7.36 (m, 7H, ArH), 7.26-7.23 (m, 5H, ArH), 7.09 (d, *J* = 8.2 Hz, 2H, ArH), 5.74 (dd, *J* = 10.3, 3.1 Hz, 1H, CH), 3.85 (dd, *J* = 16.8, 10.4 Hz, 1H, CH<sub>2</sub>), 3.10 (dd, *J* = 16.8, 3.1 Hz, 1H, CH<sub>2</sub>), 2.33 (s, 3H, CH<sub>3</sub>); <sup>13</sup>C NMR (CDCl<sub>3</sub>, 100 MHz): δ 156.7, 155.7, 146.9, 143.6, 142.3, 138.9, 137.8, 136.9, 128.9, 128.8, 128.8, 128.7, 128.7, 128.6, 128.4, 128.0, 127.8, 126.9, 126.2, 118.6, 114.6, 63.3, 36.0, 21.5; HRMS (ESI) *m/z* [M + H]<sup>+</sup> calculated for C<sub>32</sub>H<sub>27</sub>N<sub>2</sub>O<sub>2</sub>S: 503.1793, found: 503.1789.

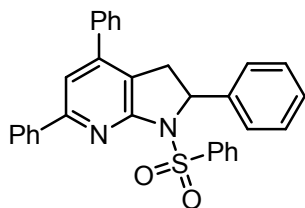

2,4,6-Triphenyl-1-(phenylsulfonyl)-2,3-dihydro-1*H*-pyrrolo[2,3-*b*]pyridine (**5b**). Yellow solid; 97.7 mg (50% yield); mp 248-249 °C; <sup>1</sup>H NMR (CDCl<sub>3</sub>, 400 MHz): δ 8.07 (d, *J* = 7.6 Hz, 2H, ArH), 7.83 (d, *J* = 7.6 Hz, 2H, ArH), 7.50-7.37 (m, 10H, ArH), 7.29 (t, *J* = 7.8 Hz, 2H, ArH), 7.25-7.19 (m, 5H, ArH), 5.75 (dd, *J* = 10.3, 3.0 Hz, 1H, CH), 3.86 (dd, *J* = 16.8, 10.4 Hz, 1H, CH<sub>2</sub>), 3.11 (dd, *J* = 16.8, 3.0 Hz, 1H, CH<sub>2</sub>); <sup>13</sup>C NMR (CDCl<sub>3</sub>, 100 MHz): δ 156.7, 155.8, 147.0, 142.1, 139.8, 138.9, 137.8, 132.7, 128.9, 128.8, 128.7, 128.7, 128.6, 128.3, 128.1, 128.1, 127.8, 126.9, 126.2, 118.6, 114.7, 63.33, 36.00; HRMS (ESI) *m/z* [M + H]<sup>+</sup> calculated for C<sub>31</sub>H<sub>25</sub>N<sub>2</sub>O<sub>2</sub>S: 489.1637, found: 489.1623.

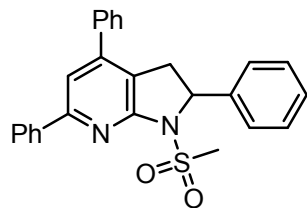

1-(Methylsulfonyl)-2,4,6-triphenyl-2,3-dihydro-1*H*-pyrrolo[2,3-*b*]pyridine (**5c**).

White solid; 90.4 mg (53% yield); mp 228-229 °C; <sup>1</sup>H NMR (CDCl<sub>3</sub>, 400 MHz): δ 8.10 (d, *J* = 7.2 Hz, 2H, ArH), 7.51-7.41 (m, 9H, ArH), 7.35-7.29 (m, 5H, ArH), 5.69 (dd, *J* = 10.2, 3.1 Hz, 1H, CH), 3.90 (dd, *J* = 16.8, 10.2 Hz, 1H, CH<sub>2</sub>), 3.31 (s, 3H, CH<sub>3</sub>), 3.15 (dd, *J* = 16.8, 3.1 Hz, 1H, CH<sub>2</sub>); <sup>13</sup>C NMR (CDCl<sub>3</sub>, 100 MHz): δ 157.0, 155.8, 147.4, 142.3, 138.6, 137.7, 129.1, 129.0, 128.9, 128.8, 128.7, 128.2, 127.8, 126.8, 125.7, 118.9, 114.7, 62.5, 41.9, 36.0; HRMS (ESI) *m/z* [M + H]<sup>+</sup> calculated for C<sub>26</sub>H<sub>23</sub>N<sub>2</sub>O<sub>2</sub>S: 427.1480, found: 427.1468.

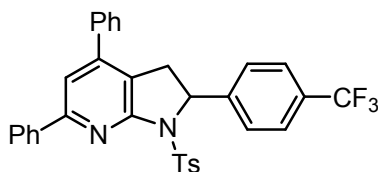

4,6-Diphenyl-1-tosyl-2-(4-(trifluoromethyl)phenyl)-2,3-dihydro-1*H*-pyrrolo[2,3-*b*]pyridine (**5d**). Yellow solid; 102.7 mg (45% yield); mp 198-199 °C; <sup>1</sup>H NMR (CDCl<sub>3</sub>, 400 MHz): δ 8.10 (d, *J* = 7.2 Hz, 2H, ArH), 7.76 (d, *J* = 8.3 Hz, 2H, ArH), 7.52-7.39 (m, 11H, ArH), 7.35 (d, *J* = 8.0 Hz, 2H, ArH), 7.12 (d, *J* = 8.1 Hz, 2H, ArH), 5.76 (dd, *J* = 10.4, 3.4 Hz, 1H, CH), 3.86 (dd, *J* = 16.8, 10.4 Hz, 1H, CH<sub>2</sub>), 3.06 (dd, *J* = 16.8, 3.5 Hz, 1H, CH<sub>2</sub>), 2.34 (s, 3H, CH<sub>3</sub>); <sup>13</sup>C NMR (CDCl<sub>3</sub>, 100 MHz): δ 156.6, 156.0, 147.3, 146.2, 144.0, 138.7, 137.6, 136.6, 130.2 (q, *J*<sub>C-F</sub> = 32.3 Hz), 129.1, 128.9, 129.0, 128.8, 128.7, 128.3, 127.7, 126.9, 126.5, 125.7 (q, *J*<sub>C-F</sub> = 3.6 Hz), 123.9 (q, *J*<sub>C-F</sub> = 270.4 Hz), 118.0, 114.8, 62.7, 35.9, 21.5; HRMS (ESI) *m/z* [M + H]<sup>+</sup> calculated for C<sub>33</sub>H<sub>26</sub>F<sub>3</sub>N<sub>2</sub>O<sub>2</sub>S: 571.1667, found: 571.1661.

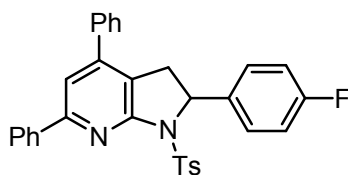

2-(4-Fluorophenyl)-4,6-diphenyl-1-tosyl-2,3-dihydro-1*H*-pyrrolo[2,3-*b*]pyridine (**5e**).

Pale yellow solid; 102.0 mg (49% yield); mp 211-212 °C; <sup>1</sup>H NMR (CDCl<sub>3</sub>, 400 MHz): δ 8.09 (d, *J* = 8.0 Hz, 2H, ArH), 7.74 (d, *J* = 8.1 Hz, 2H, ArH), 7.50 (t, *J* = 7.3 Hz, 2H, ArH), 7.44-7.39 (m, 7H, ArH), 7.21 (dd, *J* = 7.9, 5.5 Hz, 2H, ArH), 7.13 (d, *J* = 8.0 Hz, 2H, ArH), 6.93 (t, *J* = 8.5 Hz, 2H, ArH), 5.73 (dd, *J* = 10.2, 2.7 Hz, 1H, CH), 3.85 (dd, *J* = 16.8, 10.4 Hz, 1H, CH<sub>2</sub>), 3.06 (dd, *J* = 16.8, 2.9 Hz, 1H, CH<sub>2</sub>), 2.34 (s, 3H, CH<sub>3</sub>); <sup>13</sup>C NMR (CDCl<sub>3</sub>, 100 MHz): δ 162.4 (d, *J*<sub>C-F</sub> = 245.2 Hz), 156.5, 155.8, 147.0, 143.7, 138.8, 138.2 (d, *J*<sub>C-F</sub> = 3.1 Hz), 137.7, 136.8, 128.9, 128.8, 128.8, 128.2, 128.6, 128.3, 128.0 (d, *J*<sub>C-F</sub> = 8.2 Hz), 127.7, 126.9, 118.3, 115.5 (d, *J*<sub>C-F</sub> = 21.5 Hz), 114.7, 62.6, 36.0, 21.5; HRMS (ESI) *m/z* [M + H]<sup>+</sup> calculated for C<sub>32</sub>H<sub>26</sub>FN<sub>2</sub>O<sub>2</sub>S: 521.1699, found: 521.1692.

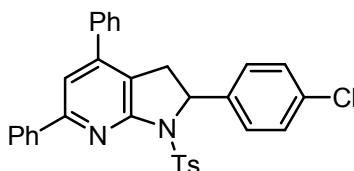

2-(4-Chlorophenyl)-4,6-diphenyl-1-tosyl-2,3-dihydro-1*H*-pyrrolo[2,3-*b*]pyridine (**5f**).

Pale yellow solid; 122.4 mg (57% yield); mp 120-121 °C; <sup>1</sup>H NMR (CDCl<sub>3</sub>, 400 MHz): δ 8.08 (d, *J* = 7.4 Hz, 2H, ArH), 7.76 (d, *J* = 8.2 Hz, 2H, ArH), 7.49 (t, *J* = 7.4 Hz, 2H, ArH), 7.45-7.39 (m, 7H, ArH), 7.22-7.13 (m, 6H, ArH), 5.70 (dd, *J* = 10.3, 3.2 Hz, 1H, CH), 3.83 (dd, *J* = 16.8, 10.4 Hz, 1H, CH<sub>2</sub>), 3.03 (dd, *J* = 16.8, 3.3 Hz, 1H, CH<sub>2</sub>), 2.35 (s, 3H, CH<sub>3</sub>); <sup>13</sup>C NMR (CDCl<sub>3</sub>, 100 MHz): δ 156.5, 155.8, 147.1, 143.8, 140.9, 138.7, 137.6, 136.7, 133.7, 128.9, 128.9, 128.8, 128.8, 128.7, 128.6, 128.3, 127.7, 127.6, 126.9, 118.2, 114.7, 62.6, 36.0, 21.5; HRMS (ESI) *m/z* [M + H]<sup>+</sup> calculated for C<sub>32</sub>H<sub>26</sub>ClN<sub>2</sub>O<sub>2</sub>S: 537.1404, found: 537.1403.

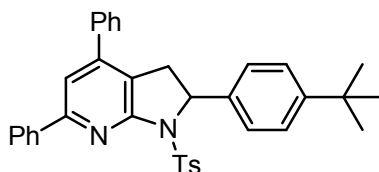

2-(4-(*tert*-Butyl)phenyl)-4,6-diphenyl-1-tosyl-2,3-dihydro-1*H*-pyrrolo[2,3-*b*]pyridine (**5g**). Yellow solid; 120.7 mg (54% yield); mp 224-225 °C; <sup>1</sup>H NMR (CDCl<sub>3</sub>, 400 MHz): δ 8.11 (dd, *J* = 7.2, 1.3 Hz, 2H, ArH), 7.64 (d, *J* = 8.3 Hz, 2H, ArH), 7.50 (t, *J* = 7.4 Hz, 2H, ArH), 7.45-7.36 (m, 7H, ArH), 7.23 (d, *J* = 8.4 Hz, 2H, ArH), 7.12 (d, *J*

= 8.4 Hz, 2H, ArH), 7.04 (d,  $J = 8.2$  Hz, 2H, ArH), 5.71 (dd,  $J = 10.2, 2.7$  Hz, 1H, CH), 3.84 (dd,  $J = 16.7, 10.3$  Hz, 1H, CH<sub>2</sub>), 3.13 (dd,  $J = 16.8, 2.8$  Hz, 1H, CH<sub>2</sub>), 2.31 (s, 3H, CH<sub>3</sub>), 1.29 (s, 9H, 3×CH<sub>3</sub>); <sup>13</sup>C NMR (CDCl<sub>3</sub>, 100 MHz): δ 156.7, 155.6, 151.0, 146.8, 143.3, 139.0, 138.9, 137.8, 136.9, 128.8, 128.8, 128.6, 128.6, 128.6, 128.4, 127.8, 126.9, 126.0, 125.5, 118.9, 114.4, 63.2, 35.8, 34.5, 31.3, 21.5; HRMS (ESI)  $m/z$  [M + H]<sup>+</sup> calculated for C<sub>36</sub>H<sub>35</sub>N<sub>2</sub>O<sub>2</sub>S: 559.2419, found: 559.2406.

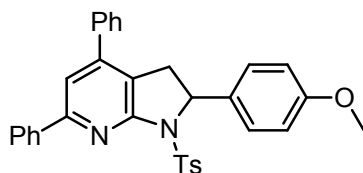

2-(4-Methoxyphenyl)-4,6-diphenyl-1-tosyl-2,3-dihydro-1*H*-pyrrolo[2,3-*b*]pyridine

(**5h**). Pale yellow solid; 134.2 mg (63% yield); mp 216-217 °C; <sup>1</sup>H NMR (CDCl<sub>3</sub>, 400 MHz): δ 8.08 (d,  $J = 7.4$  Hz, 2H, ArH), 7.70 (d,  $J = 8.2$  Hz, 2H, ArH), 7.49 (t,  $J = 7.4$  Hz, 2H, ArH), 7.44-7.39 (m, 7H, ArH), 7.15 (d,  $J = 8.6$  Hz, 2H, ArH), 7.10 (d,  $J = 8.1$  Hz, 2H, ArH), 6.76 (d,  $J = 8.6$  Hz, 2H, ArH), 5.71 (dd,  $J = 10.3, 2.8$  Hz, 1H, CH), 3.83 (dd,  $J = 16.8, 10.3$  Hz, 1H, CH<sub>2</sub>), 3.79 (s, 3H, OCH<sub>3</sub>), 3.09 (dd,  $J = 16.8, 2.8$  Hz, 1H, CH<sub>2</sub>), 2.33 (s, 3H, CH<sub>3</sub>); <sup>13</sup>C NMR (CDCl<sub>3</sub>, 100 MHz): δ 159.3, 156.6, 155.7, 146.9, 143.5, 138.9, 137.8, 137.0, 134.5, 128.8, 128.8, 128.7, 128.6, 128.6, 128.4, 127.8, 127.6, 126.9, 118.7, 114.5, 113.9, 62.9, 55.3, 36.1, 21.5; HRMS (ESI)  $m/z$  [M + H]<sup>+</sup> calculated for C<sub>33</sub>H<sub>29</sub>N<sub>2</sub>O<sub>2</sub>S: 533.1899, found: 533.1890.

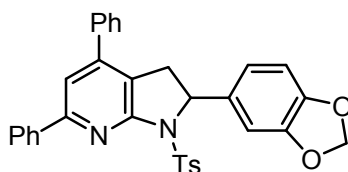

2-(Benzo[*d*][1,3]dioxol-5-yl)-4,6-diphenyl-1-tosyl-2,3-dihydro-1*H*-pyrrolo[2,3-*b*]pyridine (**5i**). Pale yellow solid; 146.5 mg (67% yield); mp 203-204 °C; <sup>1</sup>H NMR (CDCl<sub>3</sub>, 400 MHz): δ 8.09 (dd,  $J = 7.2, 1.4$  Hz, 2H, ArH), 7.78 (d,  $J = 8.3$  Hz, 2H, ArH), 7.49 (t,  $J = 7.4$  Hz, 2H, ArH), 7.44-7.37 (m, 7H, ArH), 7.13 (d,  $J = 8.1$  Hz, 2H, ArH), 6.76 (dd,  $J = 8.0, 1.5$  Hz, 1H, ArH), 6.69 (d,  $J = 8.0$  Hz, 1H, ArH), 6.59 (d,  $J = 1.5$  Hz, 1H, ArH), 5.89 (d,  $J = 5.2$  Hz, 2H, ArH), 5.65 (dd,  $J = 10.2, 3.0$  Hz, 1H, CH), 3.81 (dd,  $J = 16.8, 10.3$  Hz, 1H, CH<sub>2</sub>), 3.06 (dd,  $J = 16.8, 3.1$  Hz, 1H, CH<sub>2</sub>), 2.34 (s,

3H, CH<sub>3</sub>); <sup>13</sup>C NMR (CDCl<sub>3</sub>, 100 MHz): δ 156.6, 155.8, 147.9, 147.3, 147.0, 143.7, 138.9, 137.8, 137.0, 136.3, 128.9, 128.8, 128.8, 128.7, 128.6, 128.4, 127.8, 126.9, 120.0, 118.5, 114.6, 108.2, 106.4, 101.0, 63.3, 36.1, 21.6; HRMS (ESI) *m/z* [M + H]<sup>+</sup> calculated for C<sub>33</sub>H<sub>27</sub>N<sub>2</sub>O<sub>4</sub>S: 547.1692, found: 547.1683.

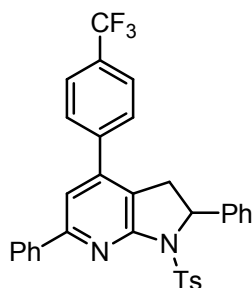

2,6-Diphenyl-1-tosyl-4-(4-(trifluoromethyl)phenyl)-2,3-dihydro-1*H*-pyrrolo[2,3-*b*]pyridine (**5j**). Pale yellow solid; 152.9 mg (67% yield); mp 103-104 °C; <sup>1</sup>H NMR (CDCl<sub>3</sub>, 400 MHz): δ 8.08 (dd, *J* = 8.5, 1.4 Hz, 2H, ArH), 7.70 (dd, *J* = 8.4, 1.9 Hz, 4H, ArH), 7.54 (d, *J* = 8.1 Hz, 2H, ArH), 7.50 (t, *J* = 7.3 Hz, 2H, ArH), 7.44 (t, *J* = 7.2 Hz, 1H, ArH), 7.39 (s, 1H, ArH), 7.28-7.19 (m, 5H, ArH), 7.10 (d, *J* = 8.2 Hz, 2H, ArH), 5.76 (dd, *J* = 10.4, 3.2 Hz, 1H, CH), 3.83 (dd, *J* = 16.8, 10.4 Hz, 1H, CH<sub>2</sub>), 3.07 (dd, *J* = 16.8, 3.2 Hz, 1H, CH<sub>2</sub>), 2.33 (s, 3H, CH<sub>3</sub>); <sup>13</sup>C NMR (CDCl<sub>3</sub>, 100 MHz): δ 156.8, 156.0, 145.4, 143.7, 142.0, 141.3, 138.5, 136.7, 130.6 (q, *J*<sub>C-F</sub> = 32.5 Hz), 129.0, 128.8, 128.7, 128.6, 128.4, 128.2, 128.0, 126.8, 126.1, 125.7 (q, *J*<sub>C-F</sub> = 3.7 Hz), 123.8 (q, *J*<sub>C-F</sub> = 270.7 Hz), 118.7, 114.2, 63.3, 35.8, 21.4; HRMS (ESI) *m/z* [M + H]<sup>+</sup> calculated for C<sub>33</sub>H<sub>26</sub>F<sub>3</sub>N<sub>2</sub>O<sub>2</sub>S: 571.1667, found: 571.1660.

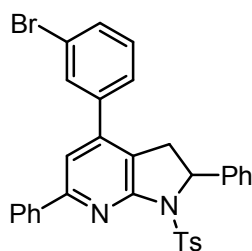

4-(3-Bromophenyl)-2,6-diphenyl-1-tosyl-2,3-dihydro-1*H*-pyrrolo[2,3-*b*]pyridine (**5k**). Pale yellow solid; 141.9 mg (61% yield); mp 205-206 °C; <sup>1</sup>H NMR (CDCl<sub>3</sub>, 400 MHz): δ 8.08 (d, *J* = 7.3 Hz, 2H, ArH), 7.70 (d, *J* = 8.2 Hz, 2H, ArH), 7.56 (s, 1H, ArH), 7.52-7.47 (m, 3H, ArH), 7.43 (t, *J* = 7.2 Hz, 1H, ArH), 7.36 (s, 1H, ArH), 7.34 (d, *J* = 7.9 Hz, 1H, ArH), 7.29 (t, *J* = 7.7 Hz, 1H, ArH), 7.27-7.20 (m, 5H, ArH), 7.09 (d, *J* = 8.1 Hz, 2H, ArH), 5.74 (dd, *J* = 10.3, 3.1 Hz, 1H, CH), 3.83 (dd, *J* = 16.8, 10.4

Hz, 1H, CH<sub>2</sub>), 3.06 (dd, *J* = 16.8, 3.2 Hz, 1H, CH<sub>2</sub>), 2.32 (s, 3H, CH<sub>3</sub>); <sup>13</sup>C NMR (CDCl<sub>3</sub>, 100 MHz): δ 156.8, 156.0, 145.4, 143.6, 142.1, 139.8, 138.6, 136.7, 131.7, 130.7, 130.3, 129.0, 128.8, 128.7, 128.6, 128.4, 128.1, 126.9, 126.4, 126.2, 122.9, 118.6, 114.2, 63.3, 35.9, 21.5; HRMS (ESI) *m/z* [M + H]<sup>+</sup> calculated for C<sub>32</sub>H<sub>26</sub>BrN<sub>2</sub>O<sub>2</sub>S: 581.0898, found: 581.0898.

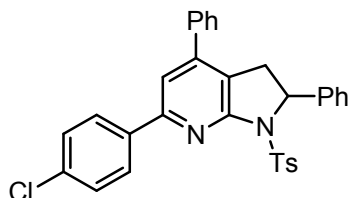

6-(4-Chlorophenyl)-2,4-diphenyl-1-tosyl-2,3-dihydro-1*H*-pyrrolo[2,3-*b*]pyridine (**5l**). Yellow solid; 118.1 mg (55% yield); mp 241-242 °C; <sup>1</sup>H NMR (CDCl<sub>3</sub>, 400 MHz): δ 8.01 (d, *J* = 8.4 Hz, 2H, ArH), 7.66 (d, *J* = 8.1 Hz, 2H, ArH), 7.45-7.37 (m, 8H, ArH), 7.25-7.22 (m, 5H, ArH), 7.09 (d, *J* = 8.1 Hz, 2H, ArH), 5.74 (dd, *J* = 10.3, 2.9 Hz, 1H, CH), 3.84 (dd, *J* = 16.9, 10.4 Hz, 1H, CH<sub>2</sub>), 3.09 (dd, *J* = 16.9, 2.9 Hz, 1H, CH<sub>2</sub>), 2.32 (s, 3H, CH<sub>3</sub>); <sup>13</sup>C NMR (CDCl<sub>3</sub>, 100 MHz): δ 156.7, 154.4, 147.0, 143.7, 142.1, 137.6, 137.3, 136.8, 134.8, 128.8, 128.8, 128.7, 128.7, 128.7, 128.3, 128.1, 128.0, 127.7, 126.2, 119.0, 114.4, 63.3, 36.0, 21.5; HRMS (ESI) *m/z* [M + H]<sup>+</sup> calculated for C<sub>32</sub>H<sub>26</sub>ClN<sub>2</sub>O<sub>2</sub>S: 537.1404, found: 537.1397.

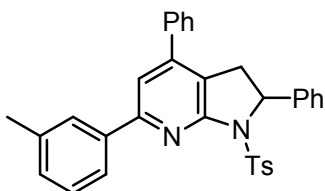

2,4-Diphenyl-6-(*m*-tolyl)-1-tosyl-2,3-dihydro-1*H*-pyrrolo[2,3-*b*]pyridine (**5m**). Yellow solid; 121.9 mg (59% yield); mp 197-198°C; <sup>1</sup>H NMR (CDCl<sub>3</sub>, 400 MHz): δ 7.87-7.85 (m, 2H, ArH), 7.71 (d, *J* = 8.1 Hz, 2H, ArH), 7.43-7.35 (m, 7H, ArH), 7.26-7.23 (m, 6H, ArH), 7.11 (d, *J* = 8.0 Hz, 2H, ArH), 5.75 (dd, *J* = 10.3, 2.9 Hz, 1H, CH), 3.85 (dd, *J* = 16.8, 10.4 Hz, 1H, CH<sub>2</sub>), 3.10 (dd, *J* = 16.8, 3.0 Hz, 1H, CH<sub>2</sub>), 2.47 (s, 3H, CH<sub>3</sub>), 2.33 (s, 3H, CH<sub>3</sub>); <sup>13</sup>C NMR (CDCl<sub>3</sub>, 100 MHz): δ 156.7, 155.9, 146.9, 143.5, 142.3, 138.9, 138.0, 137.8, 136.9, 129.6, 128.8, 128.8, 128.7, 128.6, 128.5, 128.5, 128.0, 127.8, 127.6, 126.2, 124.1, 118.5, 114.6, 63.2, 36.0, 21.6, 21.5; HRMS (ESI) *m/z* [M + H]<sup>+</sup> calculated for C<sub>33</sub>H<sub>29</sub>N<sub>2</sub>O<sub>2</sub>S: 517.1950, found: 517.1945.

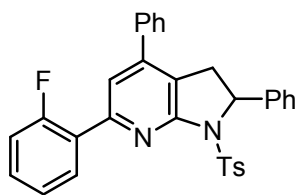

6-(2-Fluorophenyl)-2,4-diphenyl-1-tosyl-2,3-dihydro-1*H*-pyrrolo[2,3-*b*]pyridine (**5n**). Yellow solid; 104.1 mg (50% yield); mp 143-144 °C; <sup>1</sup>H NMR (CDCl<sub>3</sub>, 400 MHz): δ 8.19 (t, *J* = 7.4 Hz, 1H, ArH), 7.66 (d, *J* = 7.8 Hz, 2H, ArH), 7.56 (s, 1H, ArH), 7.43-7.13 (m, 13H, ArH), 7.07 (d, *J* = 7.8 Hz, 2H, ArH), 5.74 (d, *J* = 8.5 Hz, 1H, CH), 3.87 (dd, *J* = 16.7, 10.4 Hz, 1H, CH<sub>2</sub>), 3.12 (d, *J* = 16.9 Hz, 1H, CH<sub>2</sub>), 2.32 (s, 3H, CH<sub>3</sub>); <sup>13</sup>C NMR (CDCl<sub>3</sub>, 100 MHz): δ 167.7, 160.6 (d, *J*<sub>C-F</sub> = 248.6 Hz), 156.5, 151.1 (d, *J*<sub>C-F</sub> = 3.0 Hz), 146.6, 143.6, 142.1, 137.6, 136.7, 131.3 (d, *J*<sub>C-F</sub> = 2.6 Hz), 130.2 (d, *J*<sub>C-F</sub> = 8.5 Hz), 128.8, 128.7, 128.7, 128.6, 128.4, 128.0, 127.8, 126.9 (d, *J*<sub>C-F</sub> = 10.6 Hz), 126.2, 124.3 (d, *J*<sub>C-F</sub> = 3.4 Hz), 118.9, 118.7 (d, *J*<sub>C-F</sub> = 11.3 Hz), 116.1 (d, *J*<sub>C-F</sub> = 23.3 Hz), 63.2, 36.1, 21.5; HRMS (ESI) *m/z* [M + H]<sup>+</sup> calculated for C<sub>32</sub>H<sub>26</sub>FN<sub>2</sub>O<sub>2</sub>S: 521.1699, found: 521.1696.

## Synthetic Transformations

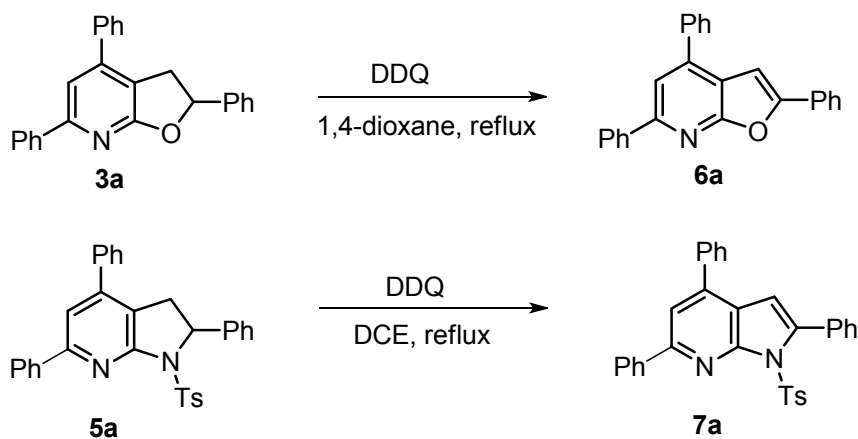

To a solution of 2,4,6-triphenyl-2,3-dihydrofuro[2,3-*b*]pyridine (**3a**; 104.8 mg, 0.3 mmol, 1.0 equiv) in anhydrous 1,4-dioxane (3 mL) was added 2,3-dichloro-5,6-dicyano-1,4-benzoquinone (204.3 mg, 0.9 mmol, 3.0 equiv) and the reaction mixture was stirred under reflux for 20 h. Then it was quenched with a sat. aq. NaHCO<sub>3</sub> solution and

extracted with EtOAc (3 × 15 mL). The combined organic layers were washed with a sat. aq. NaCl solution, dried over Na<sub>2</sub>SO<sub>4</sub> and concentrated *in vacuo*. Purification of the crude product by flash chromatography (SiO<sub>2</sub>, 1% EtOAc in PE) afforded **6a**.

2,4,6-Triphenylfuro[2,3-*b*]pyridine (**6a**). White solid; 90.7 mg (87% yield); mp 176-177 °C; <sup>1</sup>H NMR (CDCl<sub>3</sub>, 400 MHz): δ 8.16 (d, *J* = 7.5 Hz, 2H, ArH), 7.94 (d, *J* = 7.5 Hz, 2H, ArH), 7.79 (s, 1H, ArH), 7.76 (d, *J* = 7.4 Hz, 2H, ArH), 7.58 (t, *J* = 7.2 Hz, 2H, ArH), 7.53-7.44 (m, 6H, ArH), 7.38 (t, *J* = 7.0 Hz, 1H, ArH), 7.20 (s, 1H, ArH); <sup>13</sup>C NMR (CDCl<sub>3</sub>, 100 MHz): δ 162.7, 155.9, 152.5, 143.6, 139.0, 137.9, 129.6, 129.1, 129.0, 128.9, 128.8, 128.8, 128.7, 128.2, 127.0, 125.0, 118.2, 115.6, 99.7; HRMS (ESI) *m/z* [M + H]<sup>+</sup> calculated for C<sub>25</sub>H<sub>18</sub>NO: 348.1388, found: 348.1383.

To a solution of 2,4,6-triphenyl-1-tosyl-2,3-dihydro-1*H*-pyrrolo[2,3-*b*]pyridine (**5a**; 150.8 mg, 0.3 mmol, 1.0 equiv) in anhydrous DCE (4 mL) was added DDQ (204.3 mg, 0.9 mmol, 3.0 equiv) and the reaction mixture was stirred under reflux for 24 h. Then it was quenched with a sat. aq. NaHCO<sub>3</sub> solution and extracted with CH<sub>2</sub>Cl<sub>2</sub> (3 × 15 mL). The combined organic layers were washed with a sat. aq. NaCl solution, dried over Na<sub>2</sub>SO<sub>4</sub> and concentrated *in vacuo*. Purification of the crude product by flash chromatography (SiO<sub>2</sub>, 2% EtOAc in PE) afforded **7a**.

2,4,6-Triphenyl-1-tosyl-1*H*-pyrrolo[2,3-*b*]pyridine (**7a**). White solid; 129.2 mg (86% yield); mp 194-195 °C; <sup>1</sup>H NMR (CDCl<sub>3</sub>, 400 MHz): δ 8.25 (dd, *J* = 7.3, 1.2 Hz, 2H, ArH), 7.94 (d, *J* = 8.3 Hz, 2H, ArH), 7.77 (s, 1H, ArH), 7.67-7.60 (m, 4H, ArH), 7.55 (t, *J* = 7.6 Hz, 2H, ArH), 7.52-7.43 (m, 7H, ArH), 7.18 (d, *J* = 8.2 Hz, 2H, ArH), 6.72 (s, 1H, ArH), 2.32 (s, 3H, CH<sub>3</sub>); <sup>13</sup>C NMR (CDCl<sub>3</sub>, 100 MHz): δ 152.5, 150.6, 144.7, 142.7, 142.4, 139.2, 137.9, 135.9, 133.0, 129.7, 129.2, 129.0, 128.8, 128.7, 128.7, 128.7, 128.4, 128.2, 127.7, 127.0, 119.0, 115.4, 108.3, 21.57; HRMS (ESI) *m/z* [M + H]<sup>+</sup> calculated for C<sub>32</sub>H<sub>25</sub>N<sub>2</sub>O<sub>2</sub>S: 501.1637, found: 501.1633.



## References

- 1 (a) R. J. Cox, D. J. Ritson, T. A. Dane, J. Berge, J. P. H. Charmant and A. Kantacha, *Chem. Commun.*, 2005, 1037; (b) S. Cacchi, G. Fabrizi and E. Filisti, *Org. Lett.*, 2008, **10**, 2629.
- 2 S. Morales, F. G. Guijarro, J. L. G. Ruano and M. B. Cid, *J. Am. Chem. Soc.*, 2014, **136**, 1082.

## X-Ray Structure of **3a**

Crystal data

Crystallographic data for compound **3a** (CCDC-1544842) has been deposited with the Cambridge Crystallographic Data Centre, Copies of the data can be obtained, free of charge, on application to CCDC (Email:deposit@ccdc.cam.ac.uk).

Datablock: **3a**

---

Bond precision: C-C = 0.0015 Å Wavelength=0.71073  
Cell: a=9.3863(16) b=17.598(3) c=11.455(2)  
alpha=90 beta=106.320(4) gamma=90  
Temperature: 113 K

|             | Calculated | Reported  |
|-------------|------------|-----------|
| Volume      | 1815.9(5)  | 1815.9(5) |
| Space group | P 21/c     | P2(1)/c   |
| Hall group  | -P 2ybc    | -P 2ybc   |

|                        |                                     |                                     |
|------------------------|-------------------------------------|-------------------------------------|
| Moiety formula         | C <sub>25</sub> H <sub>19</sub> N O | C <sub>25</sub> H <sub>19</sub> N O |
| Sum formula            | C <sub>25</sub> H <sub>19</sub> N O | C <sub>25</sub> H <sub>19</sub> N O |
| Mr                     | 349.41                              | 349.41                              |
| Dx,g cm <sup>-3</sup>  | 1.278                               | 1.278                               |
| Z                      | 4                                   | 4                                   |
| Mu (mm <sup>-1</sup> ) | 0.077                               | 0.077                               |
| F000                   | 736.0                               | 736.0                               |
| F000'                  | 736.29                              |                                     |
| h,k,lmax               | 12,22,14                            | 12,22,14                            |
| Nref                   | 4183                                | 4121                                |
| Tmin,Tmax              | 0.985,0.991                         | 0.985,0.991                         |
| Tmin'                  | 0.985                               |                                     |

Correction method= # Reported T Limits: Tmin=0.985 Tmax=0.991

AbsCorr = MULTI-SCAN

Data completeness= 0.985

Theta(max)= 27.540

R(reflections)= 0.0367( 3514)

wR2(reflections)= 0.1049( 4121)

S = 1.039

Npar= 244

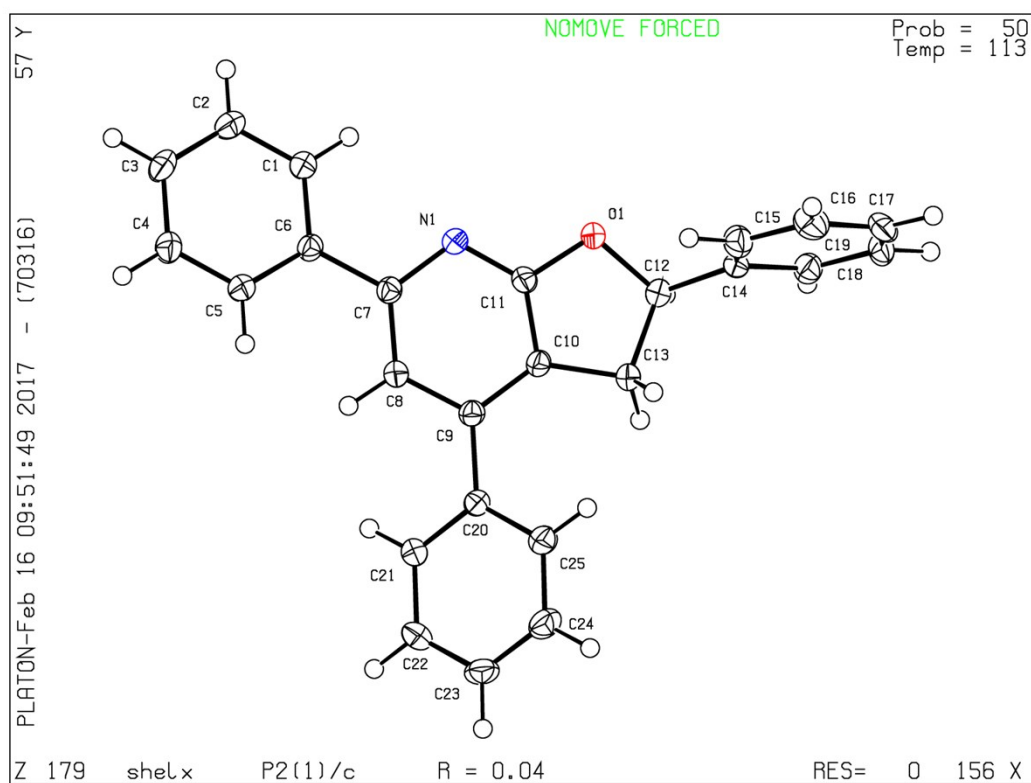

Figure 1. Ortep view of the complex **3a** (Color scheme: C, gray; N, blue; O, red)

# <sup>1</sup>H and <sup>13</sup>C NMR spectra

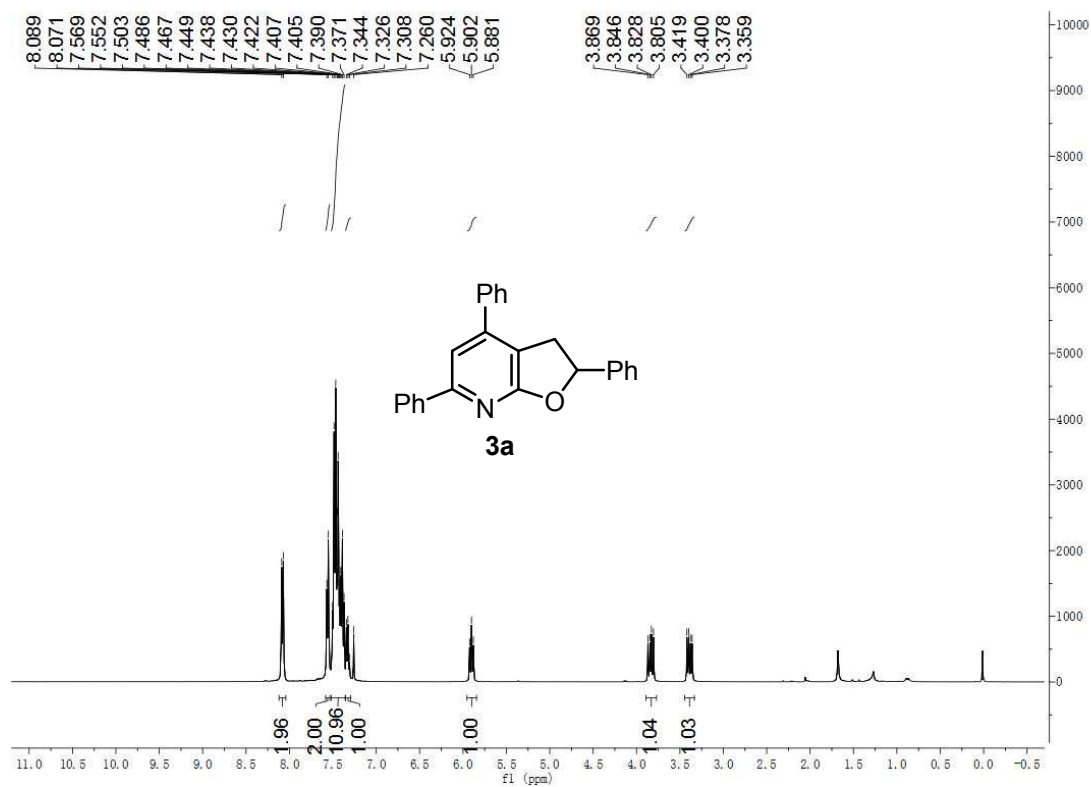

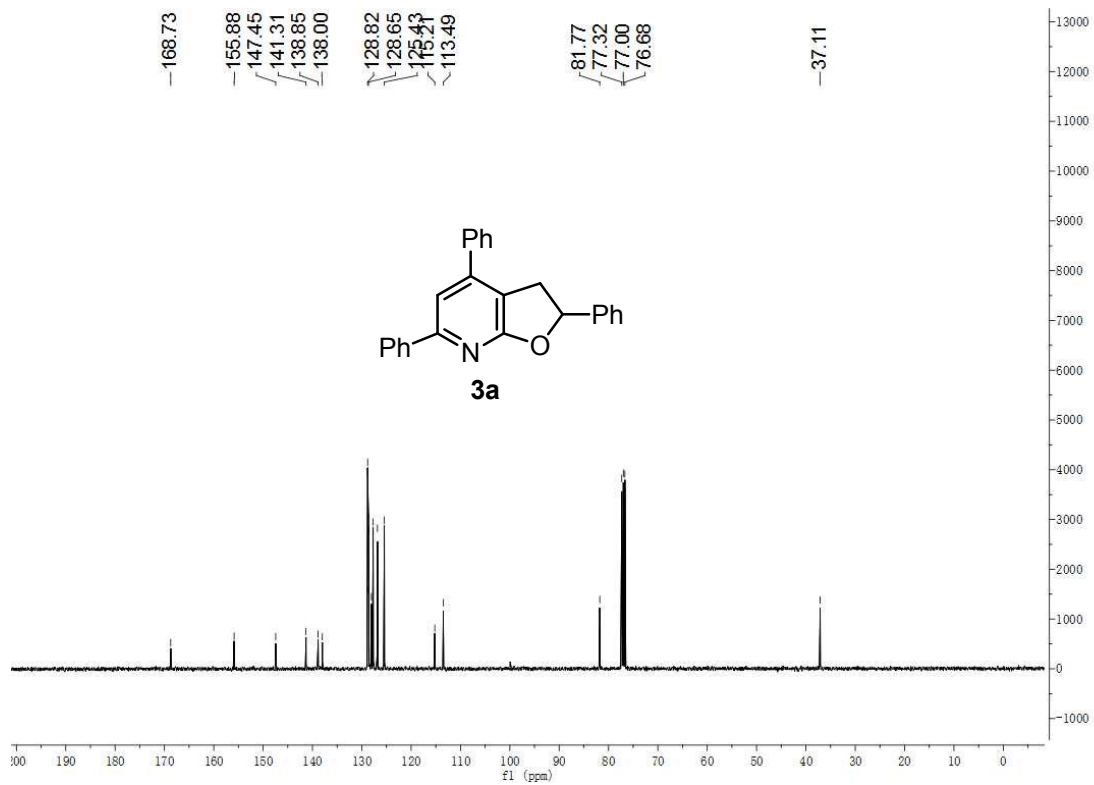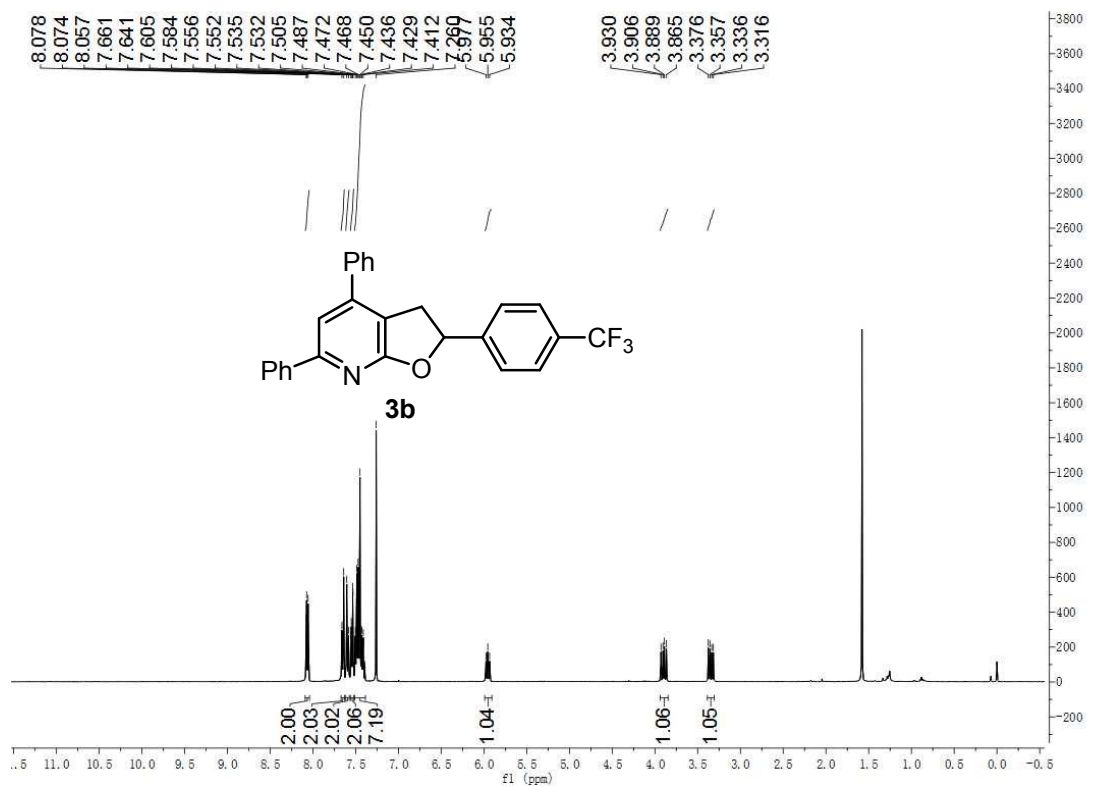

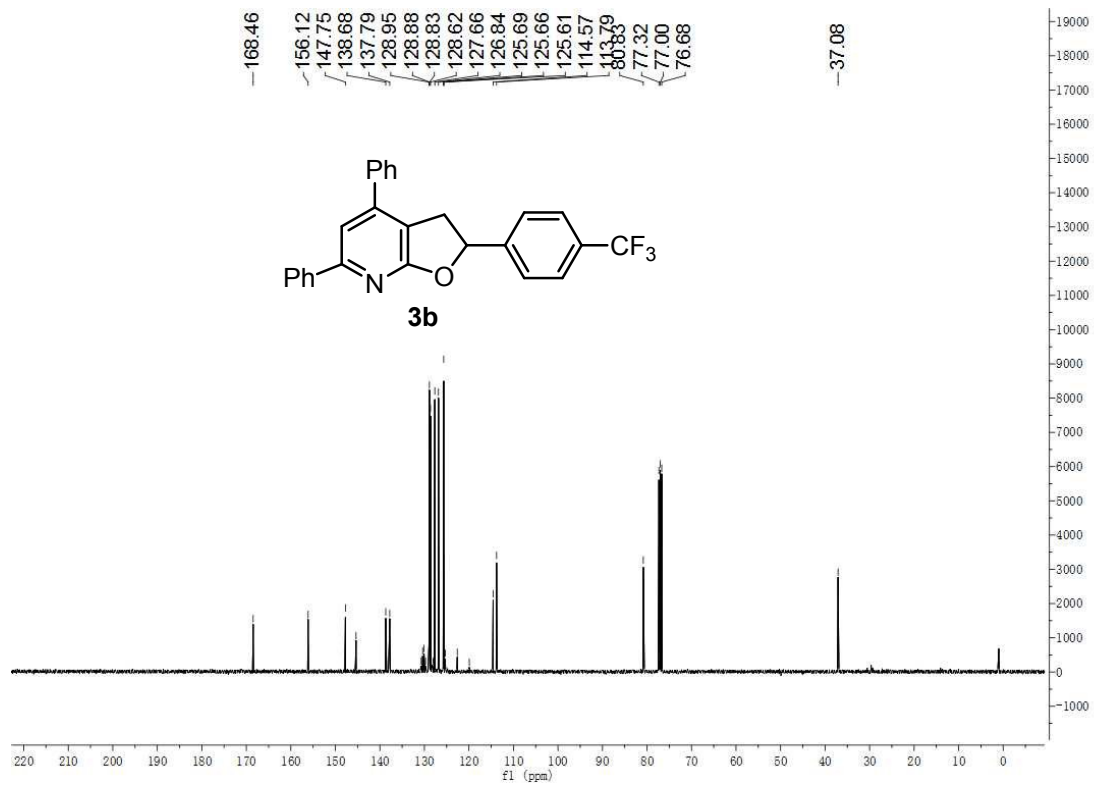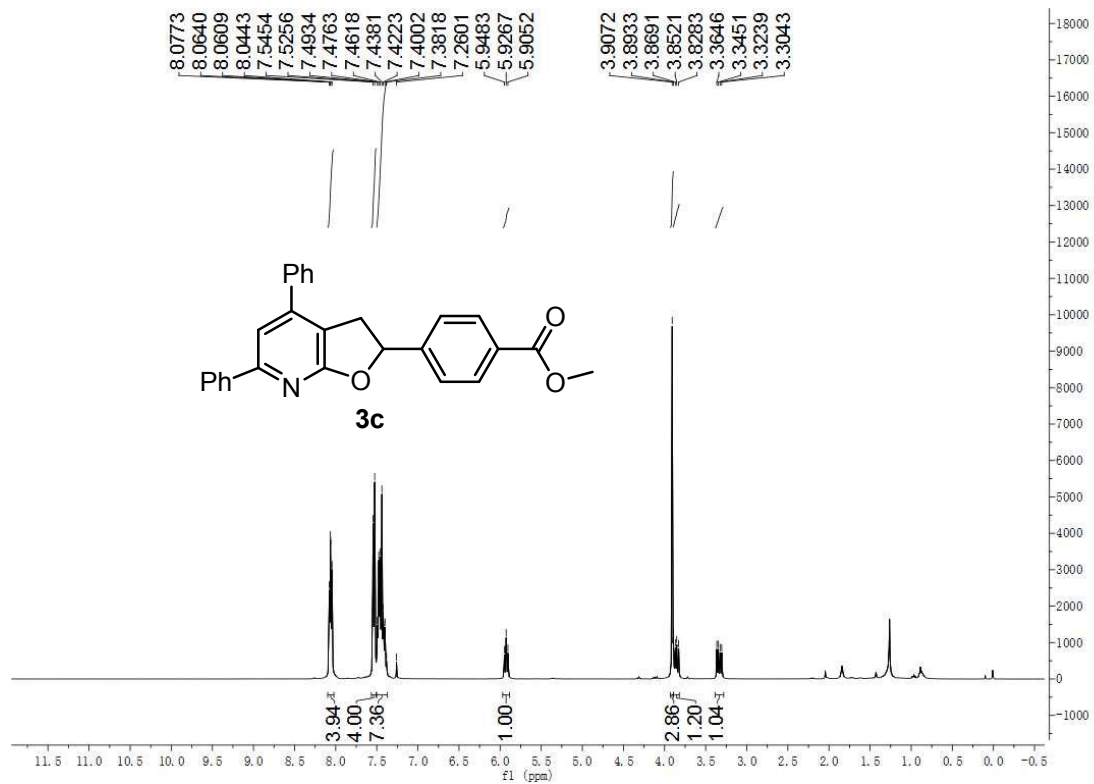

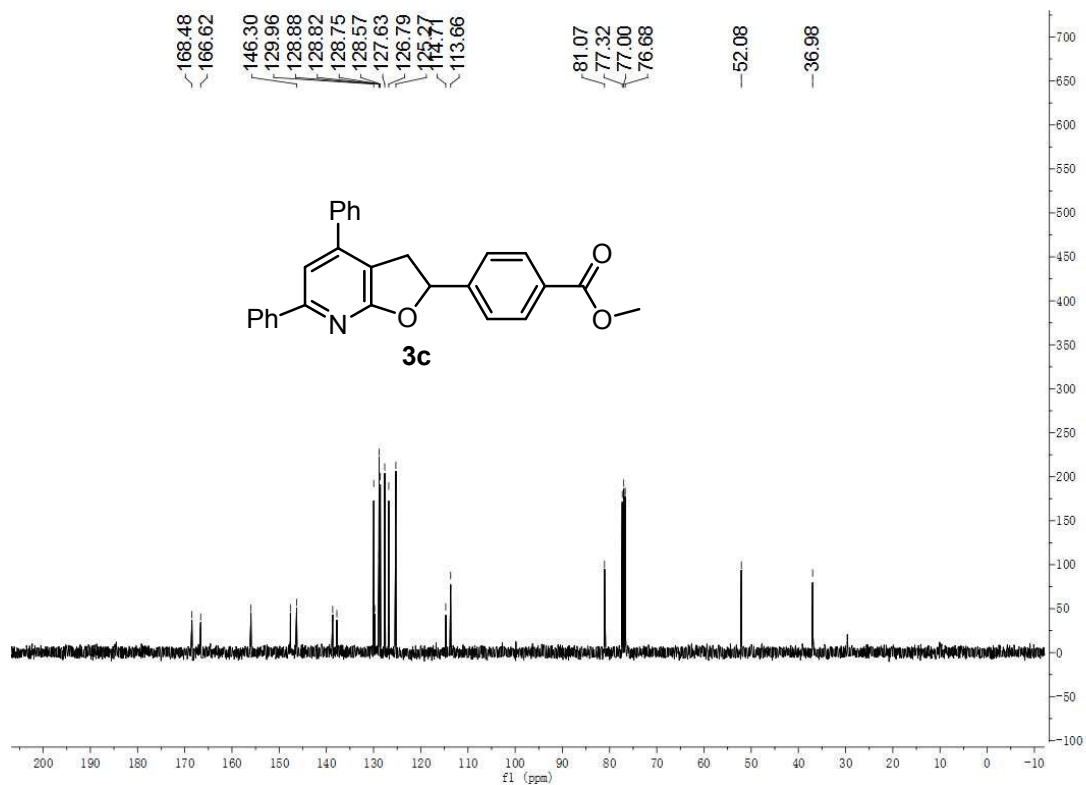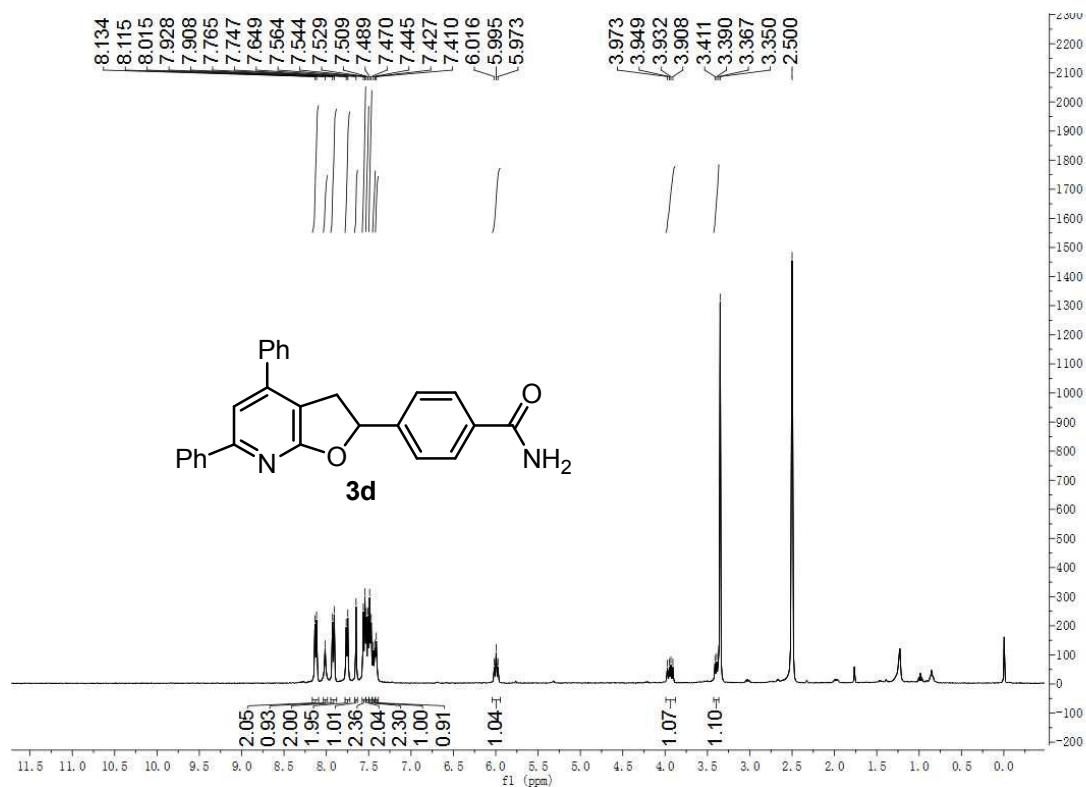

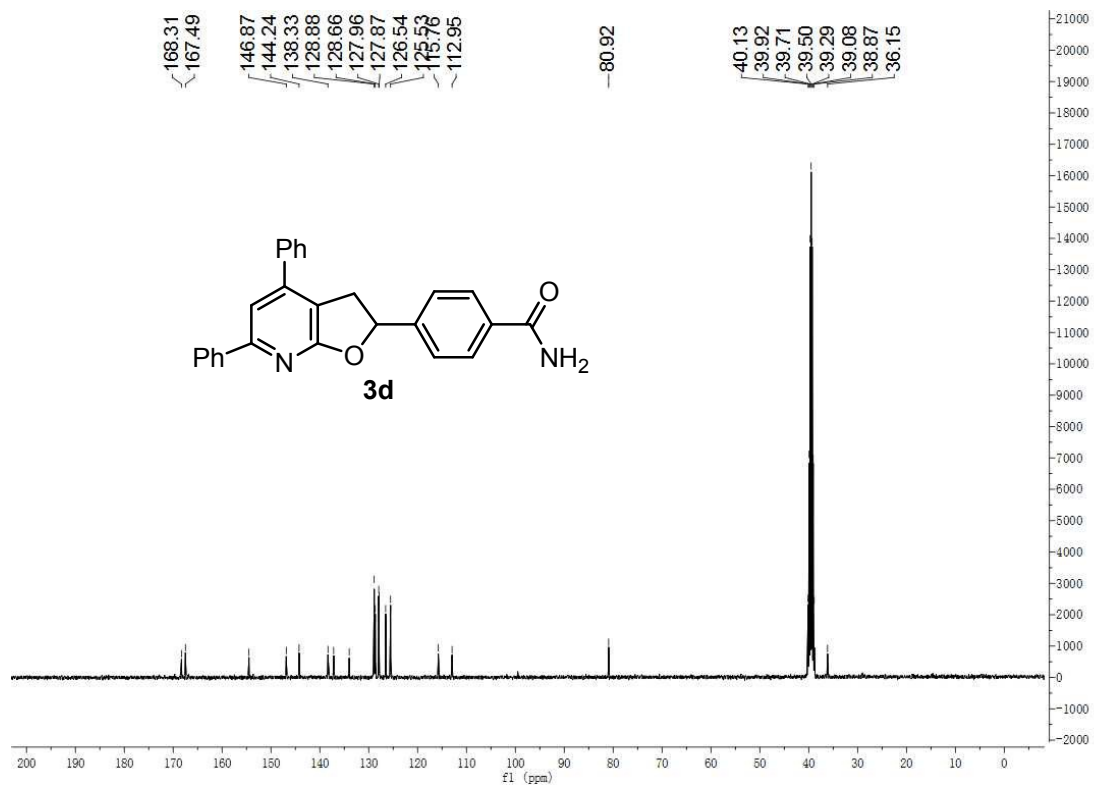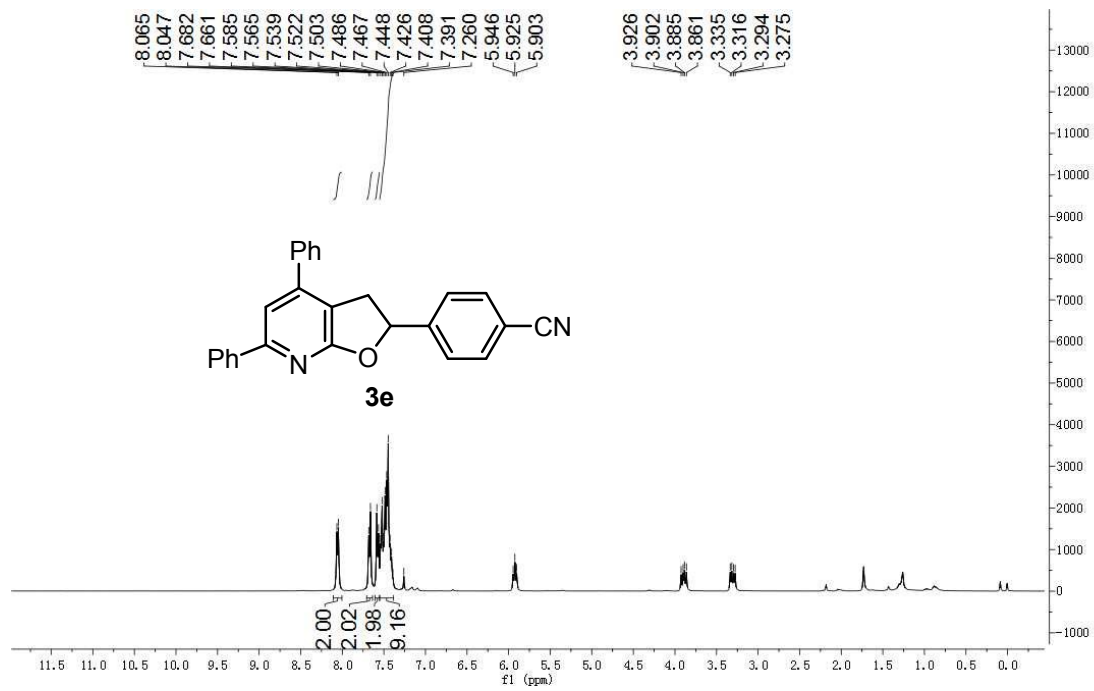

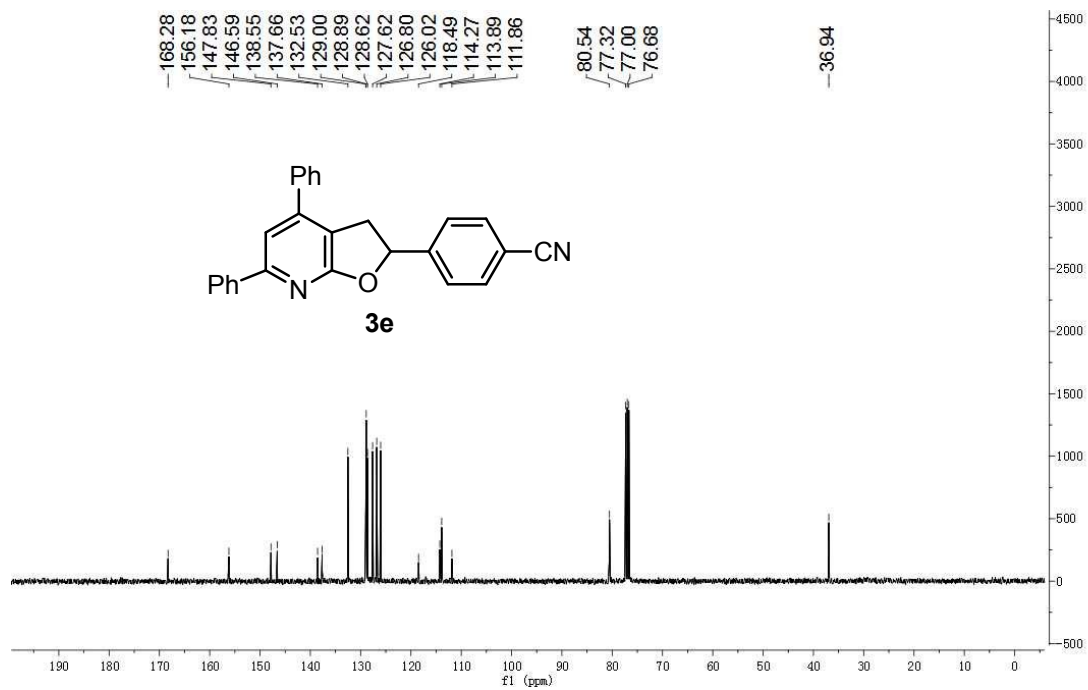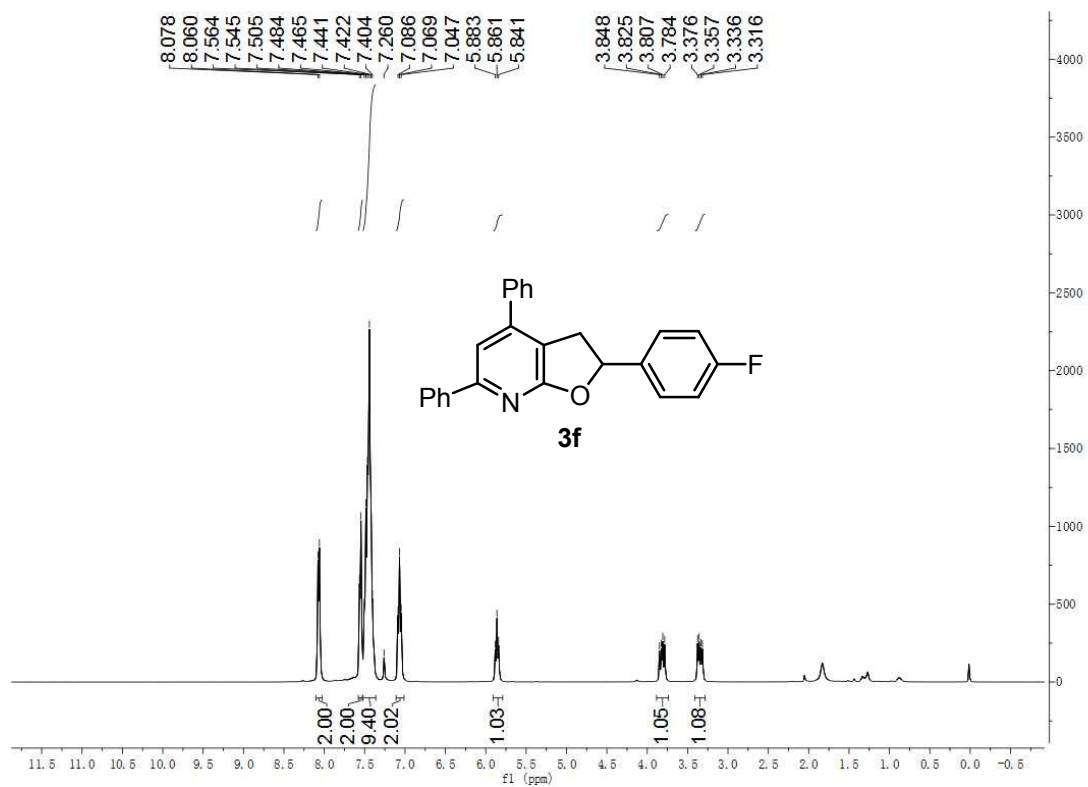



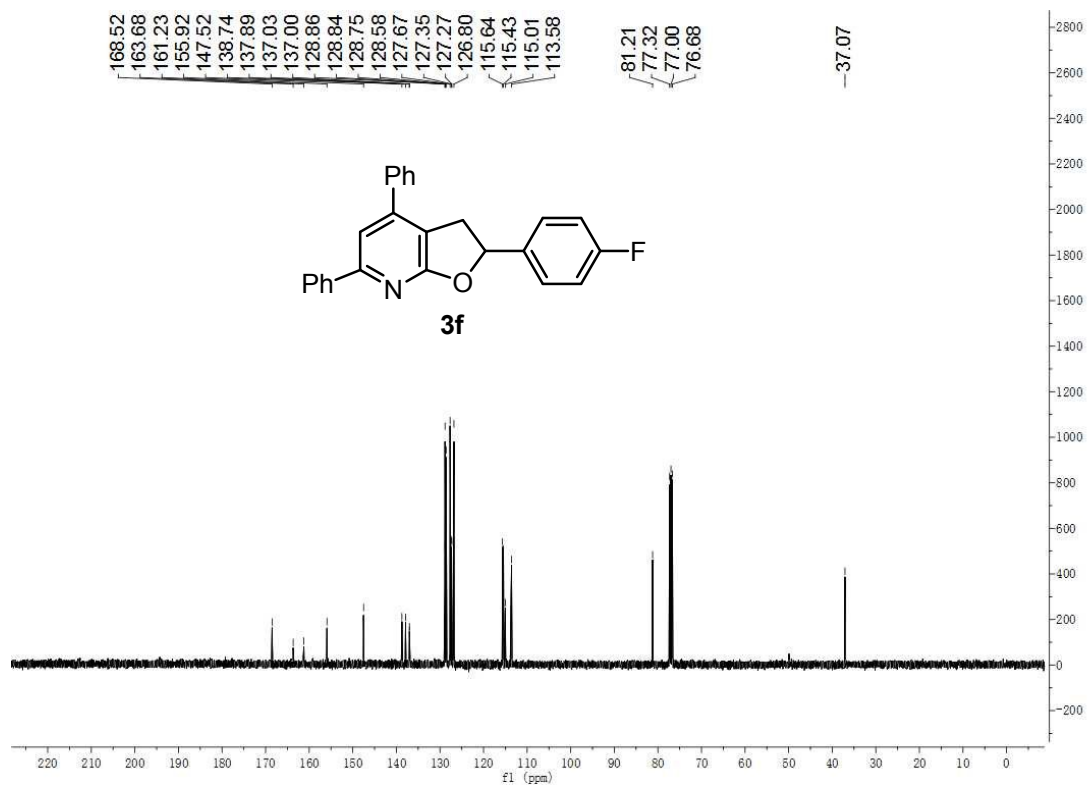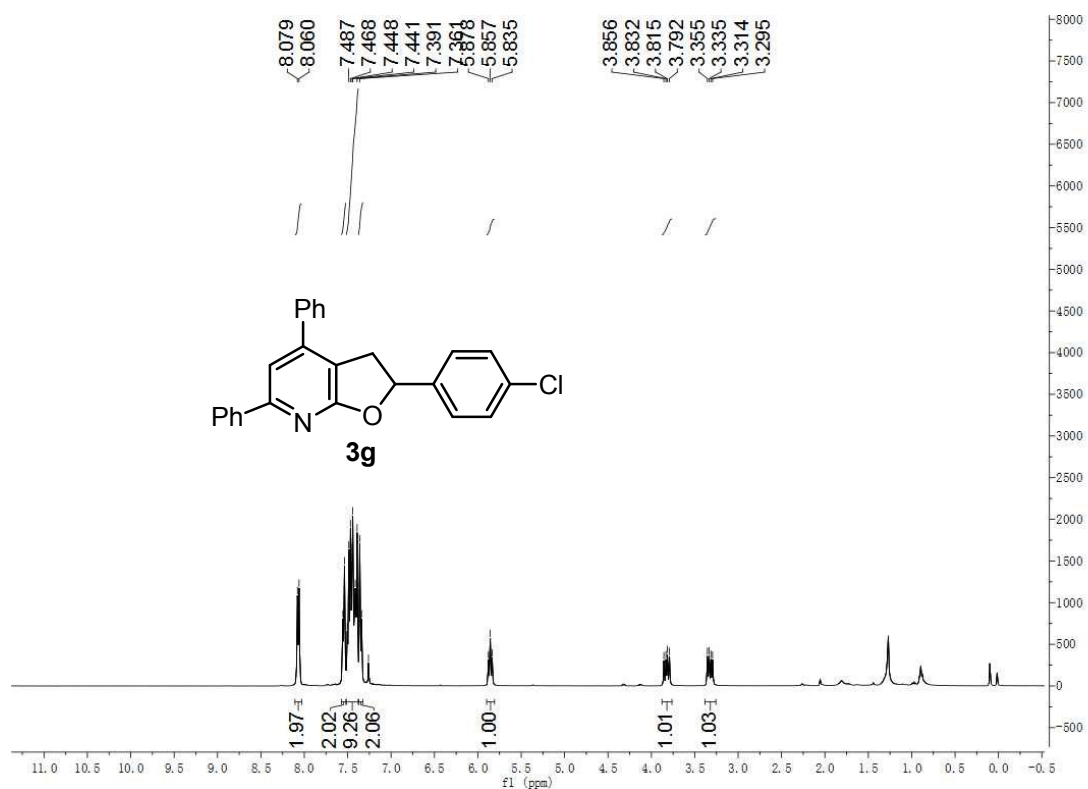

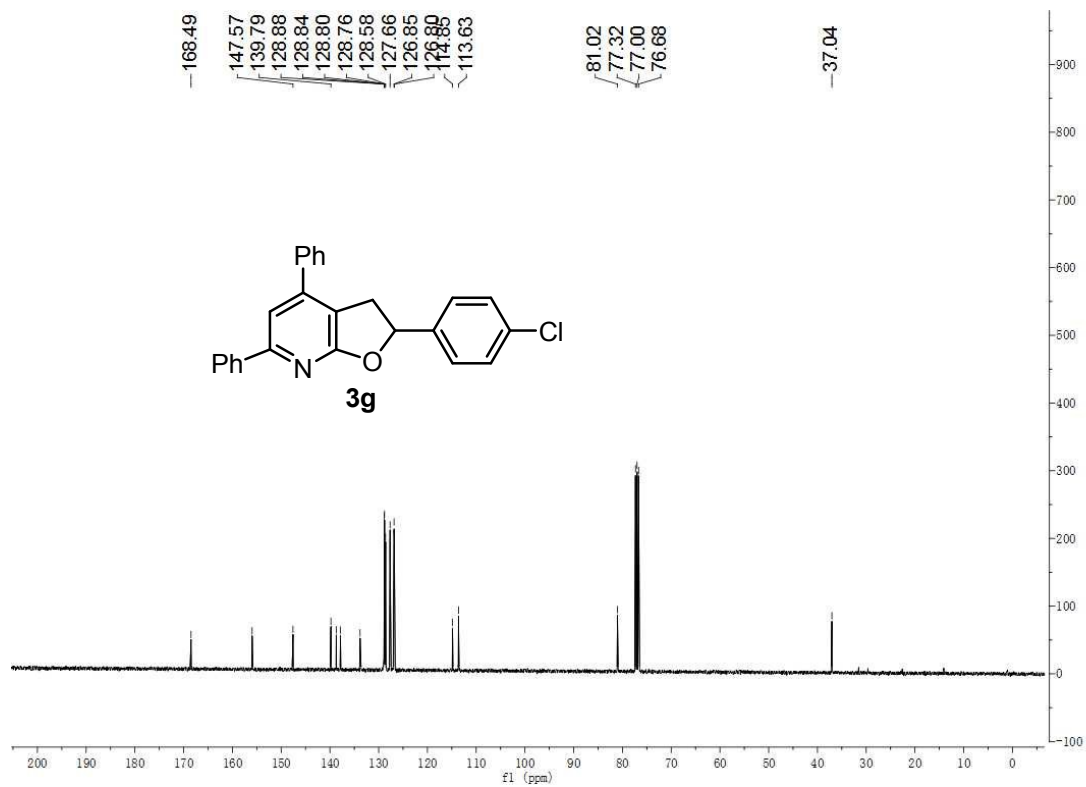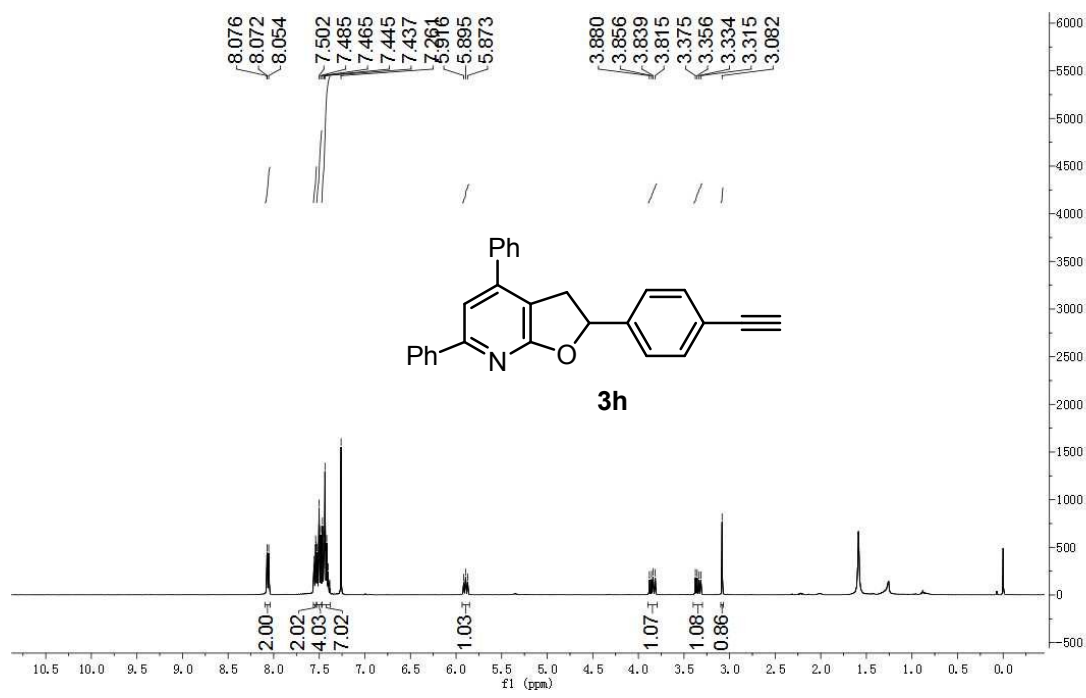

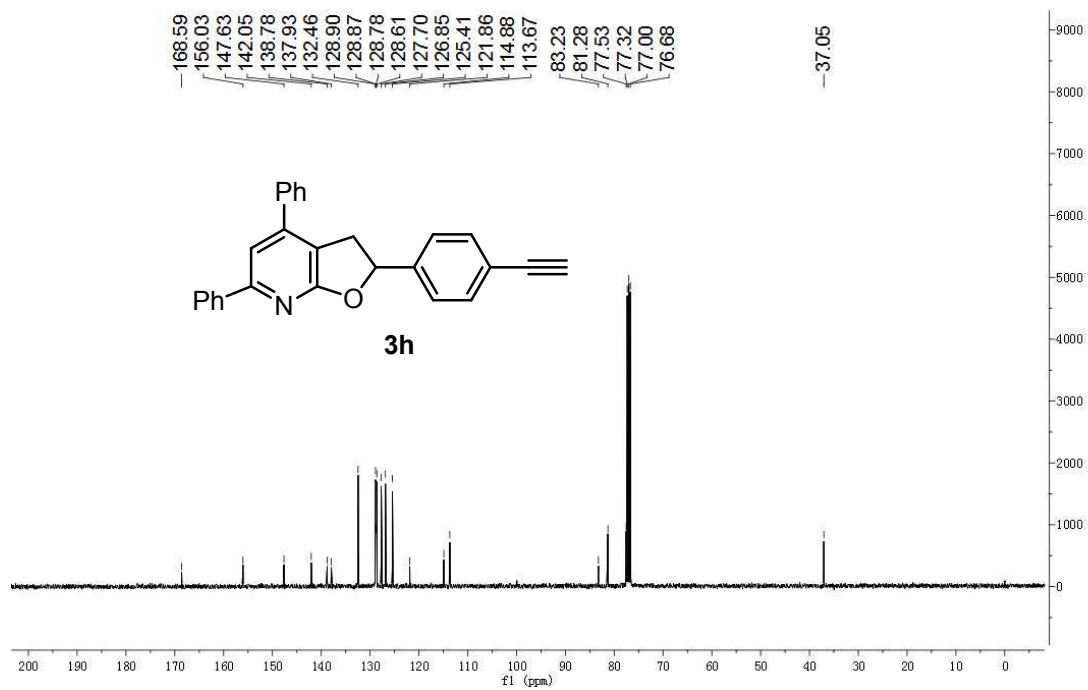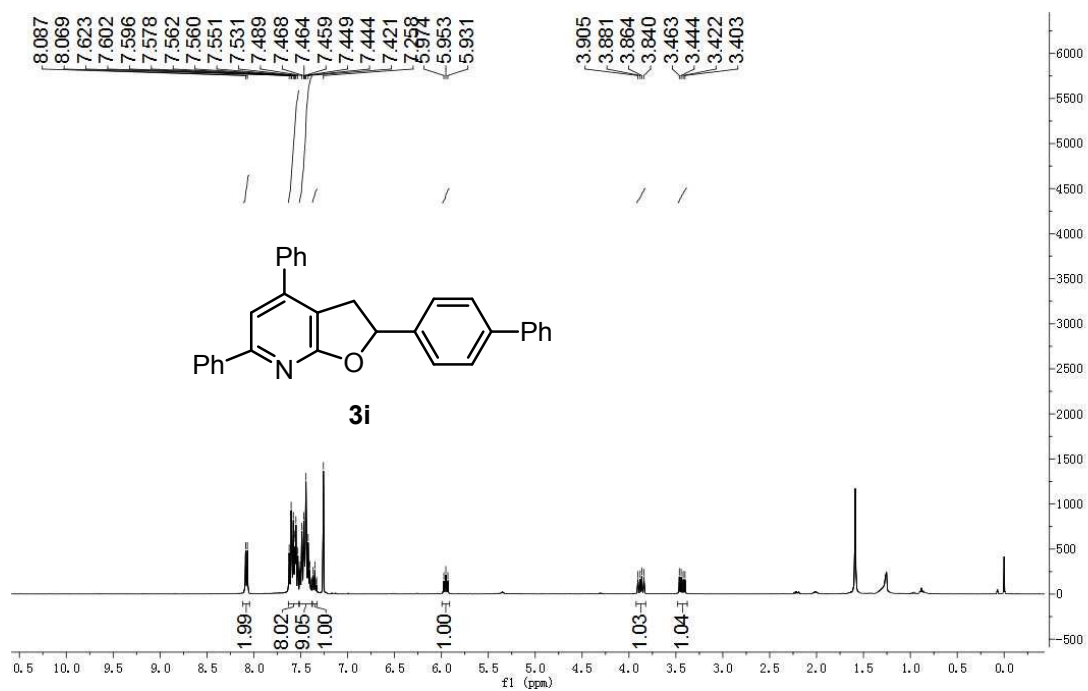

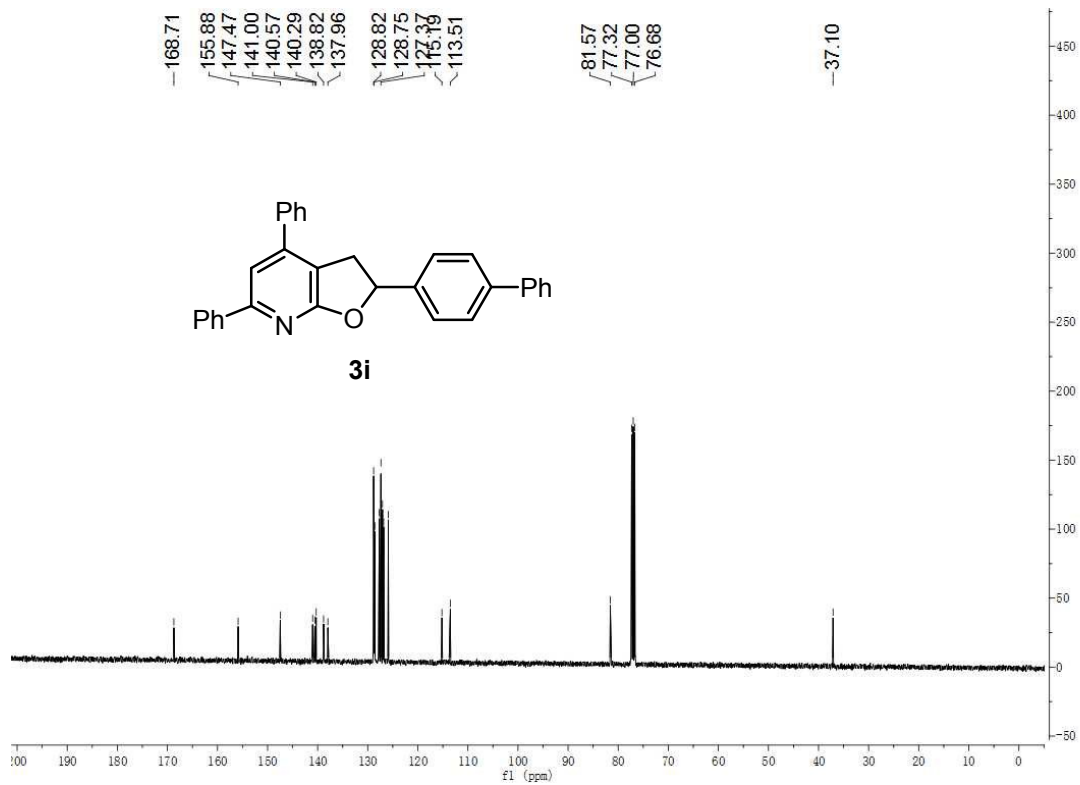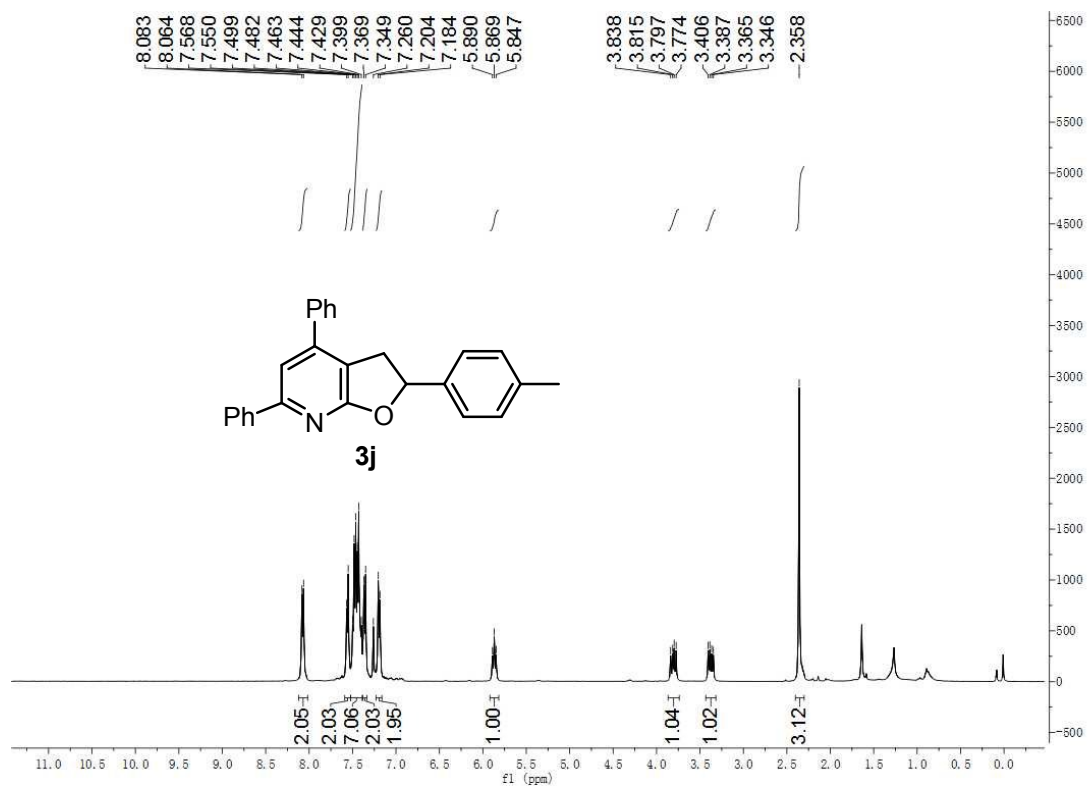

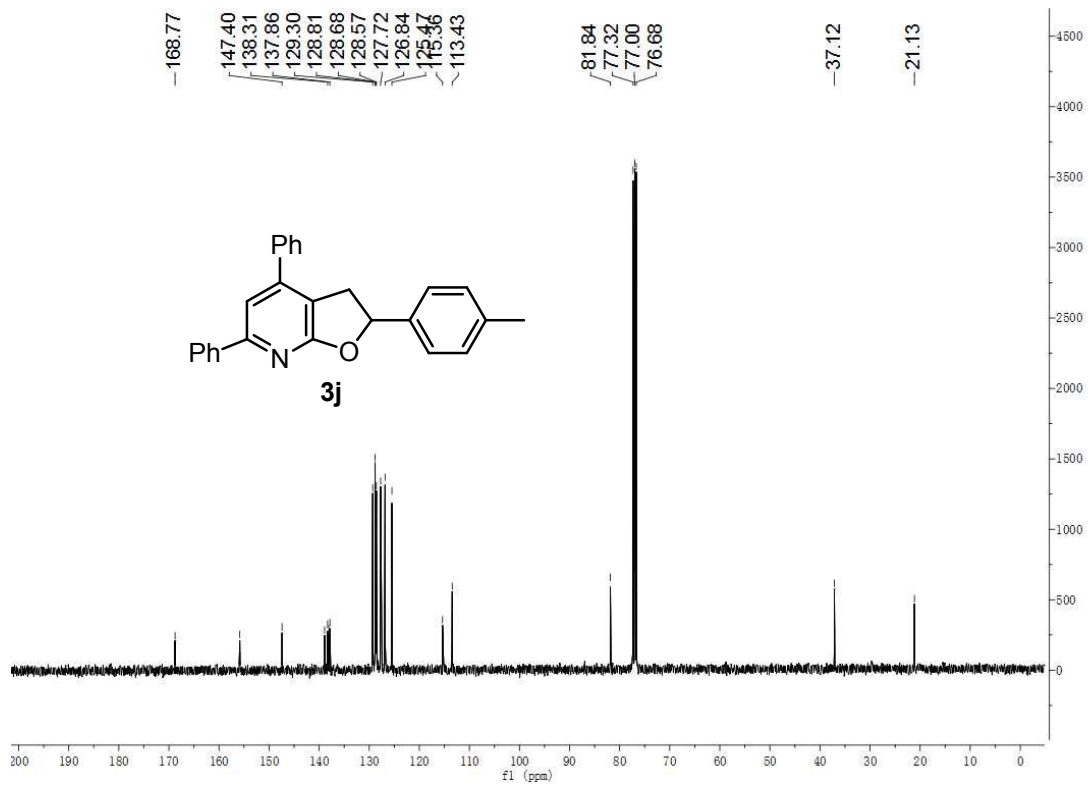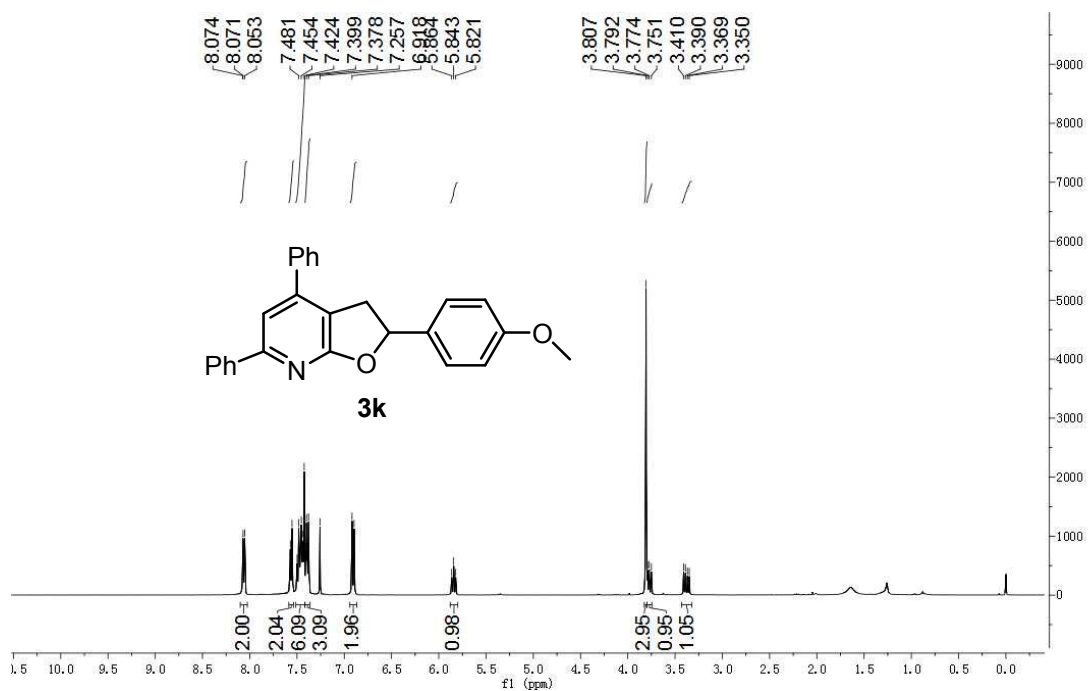

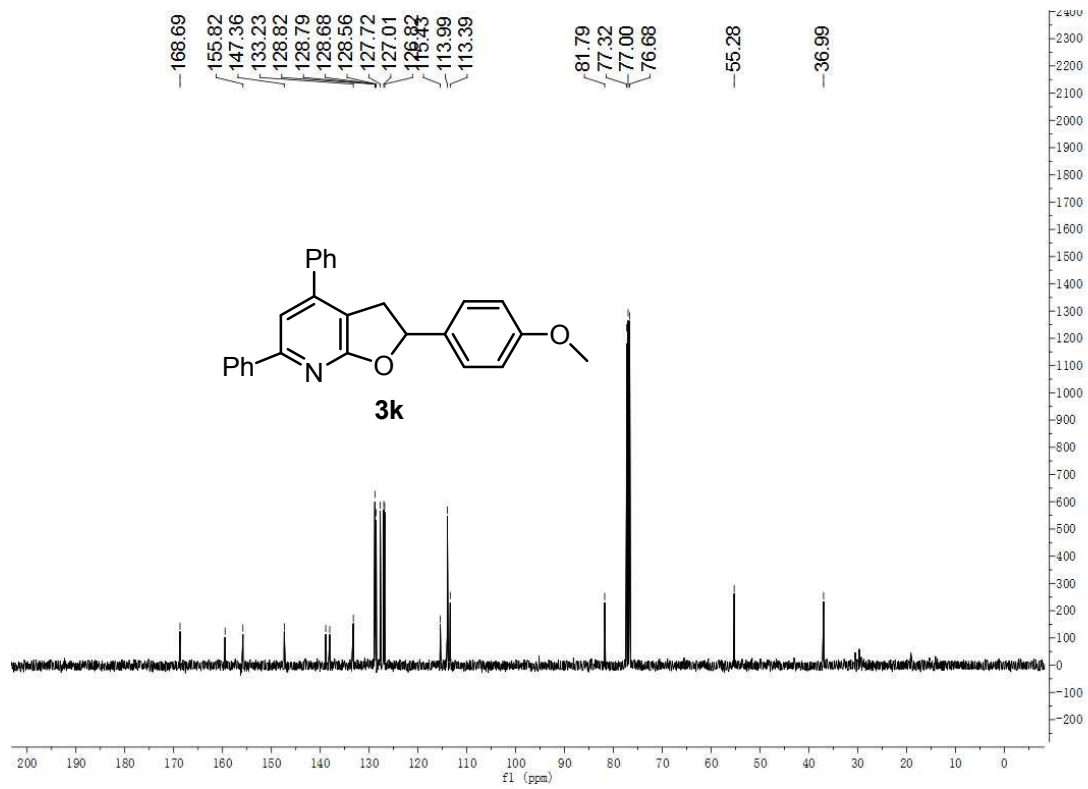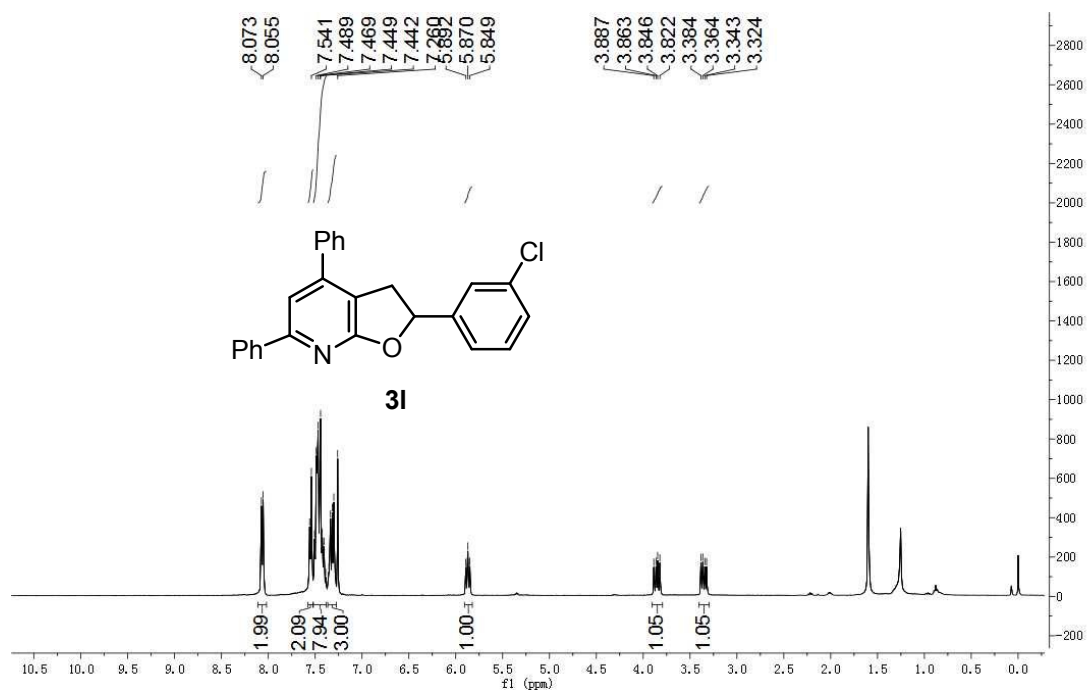

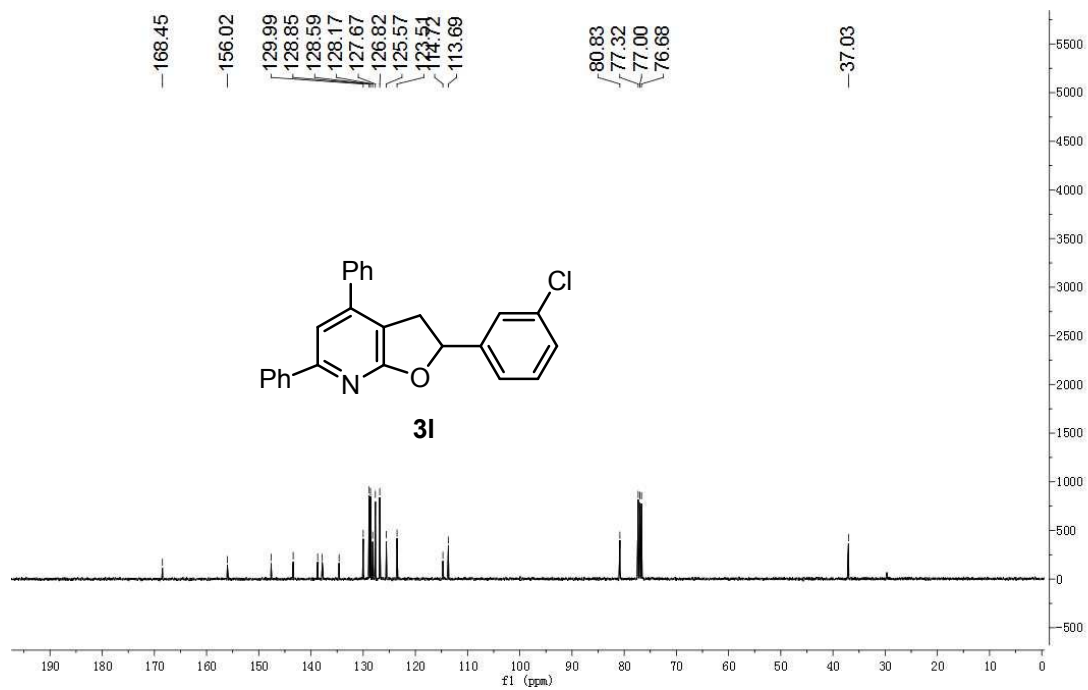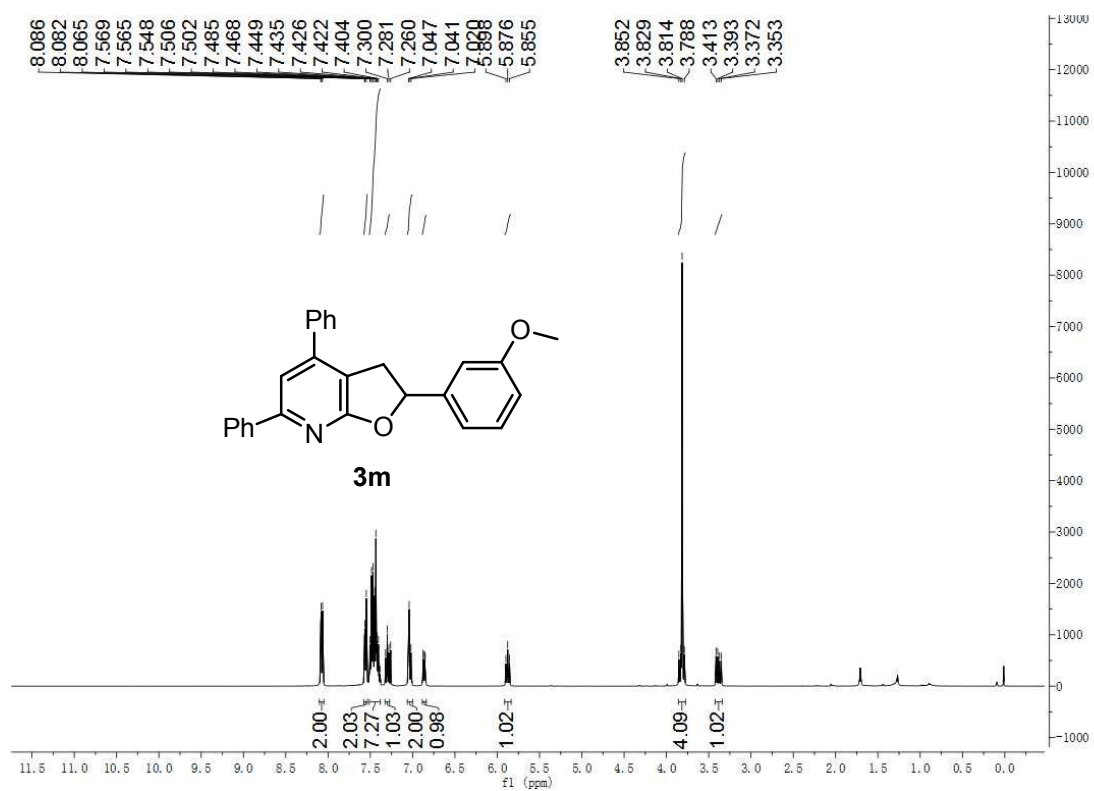

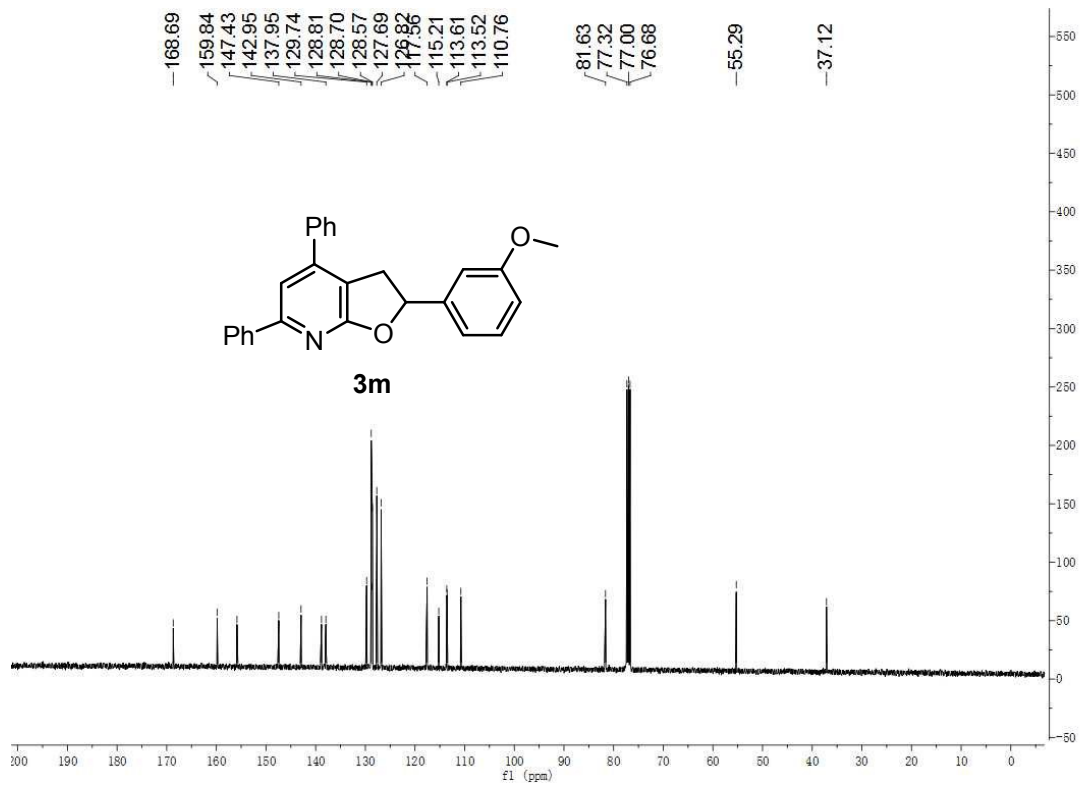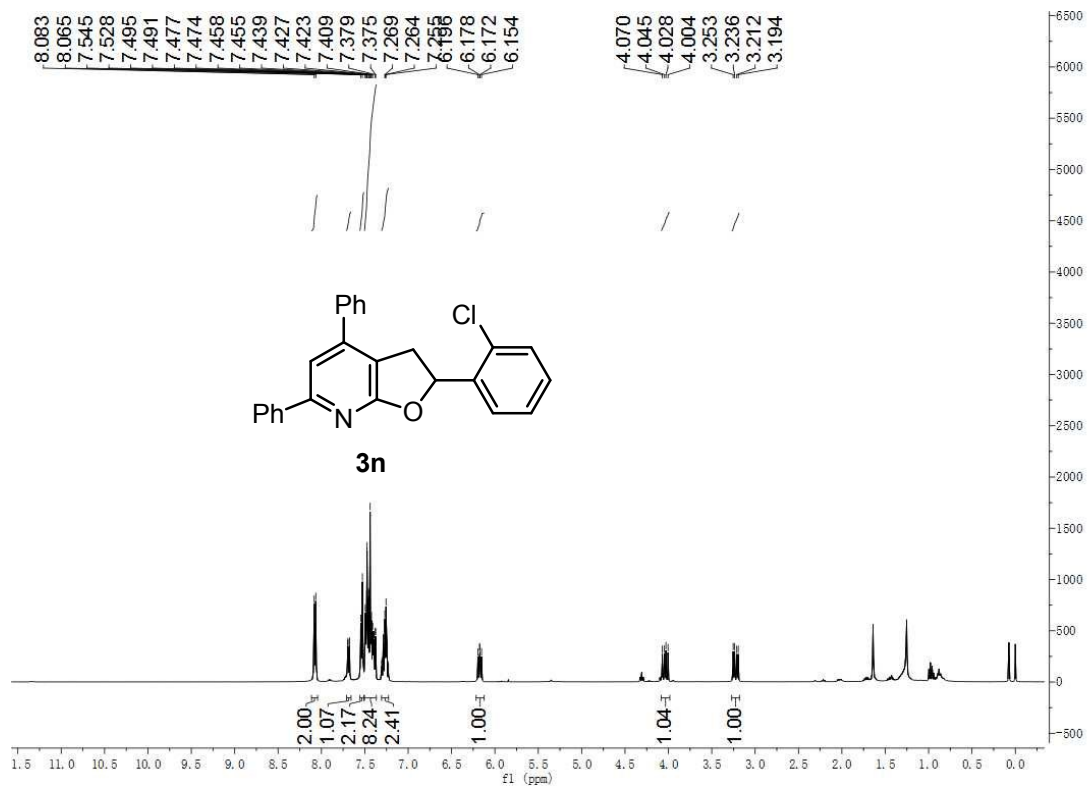



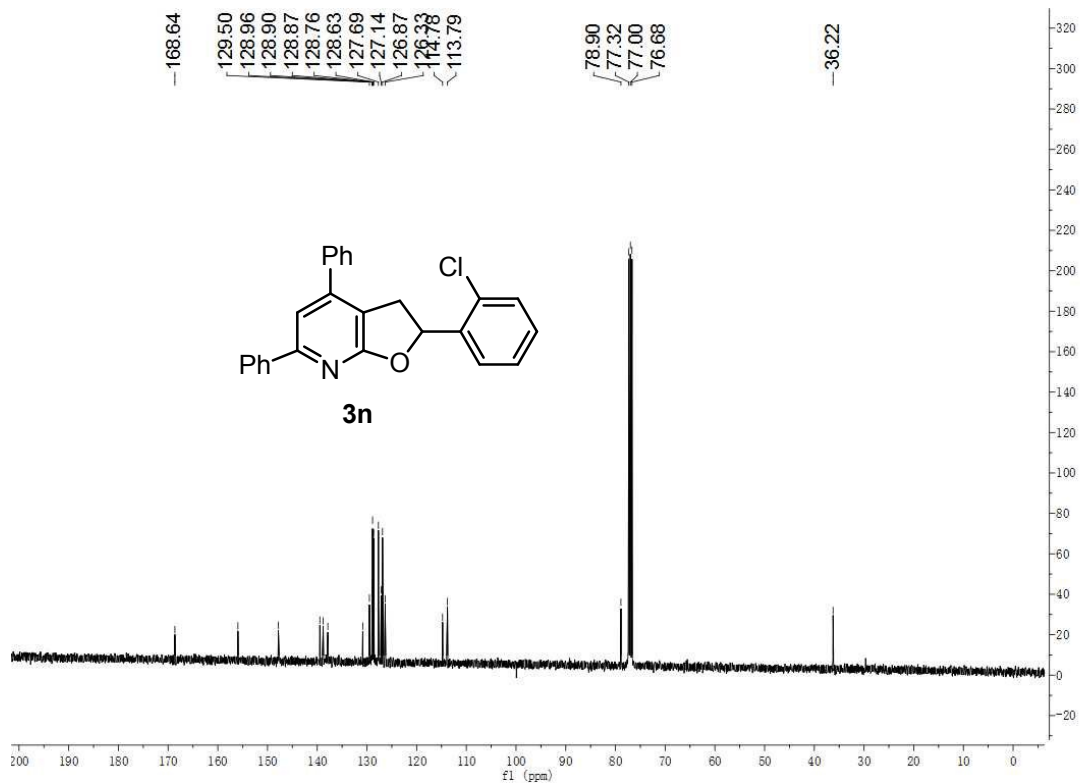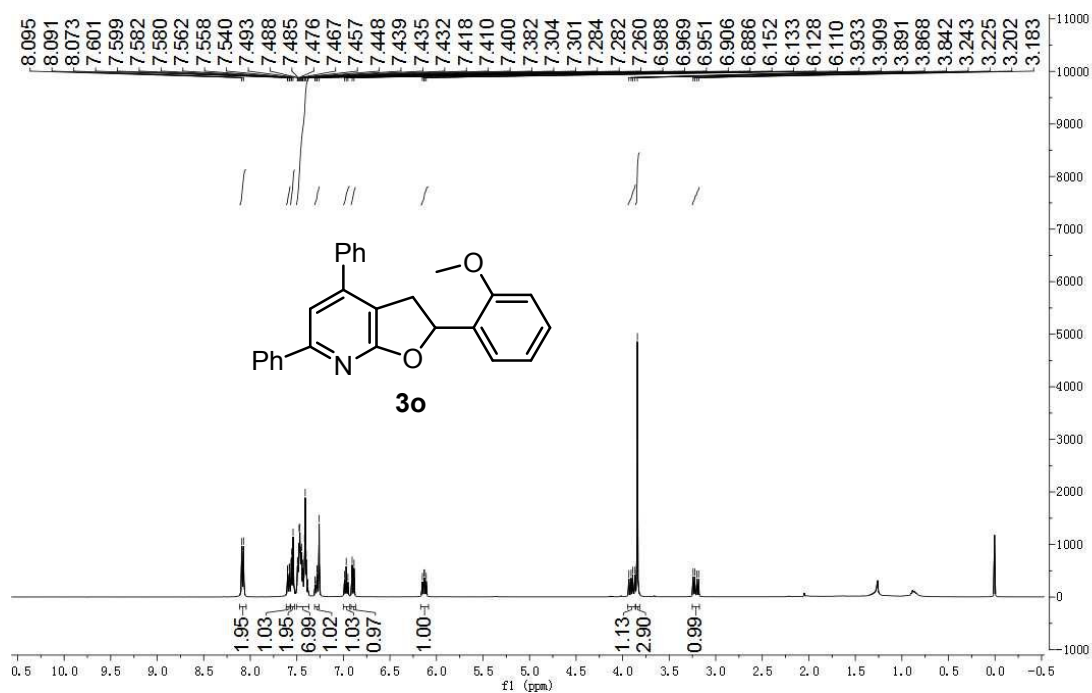

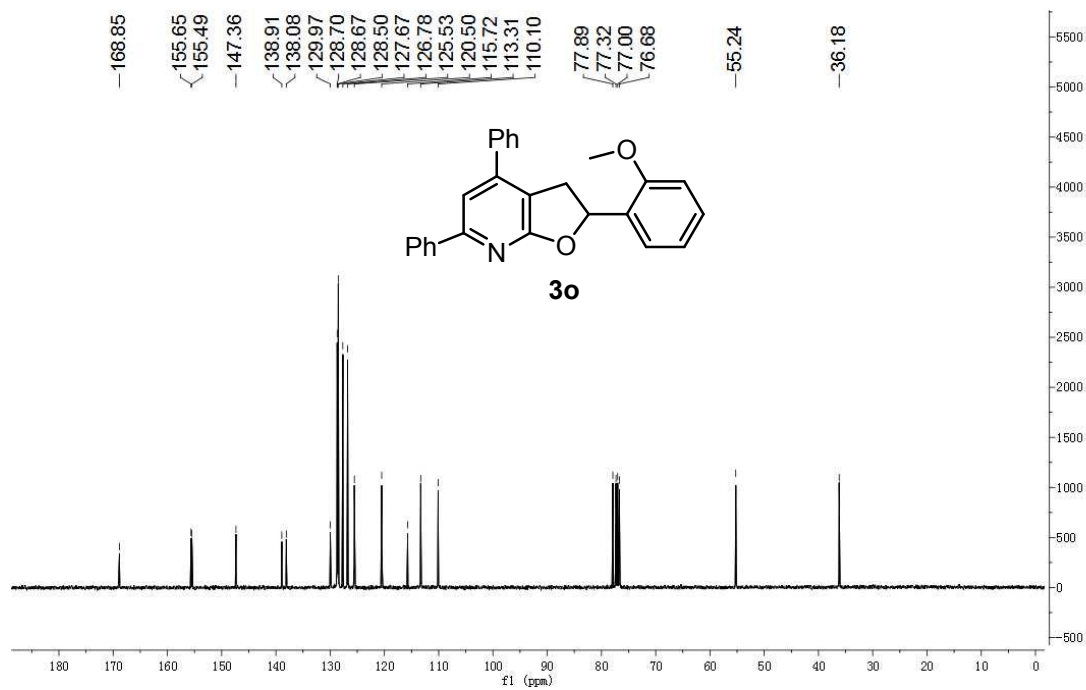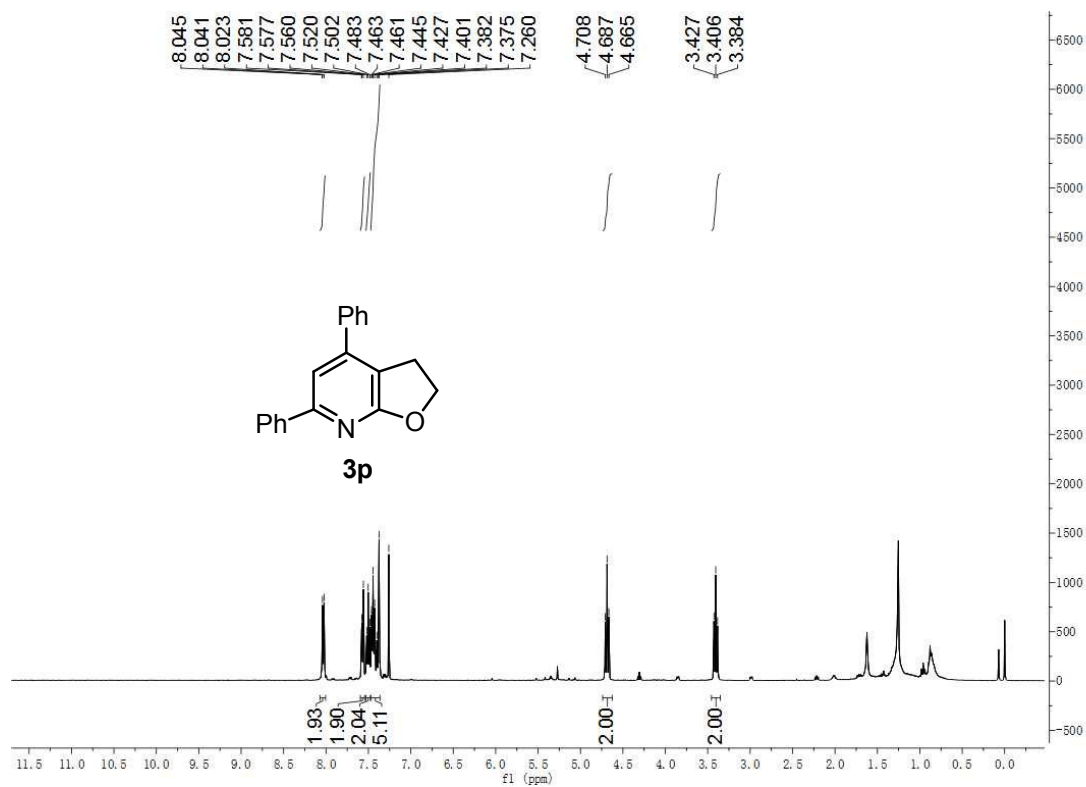

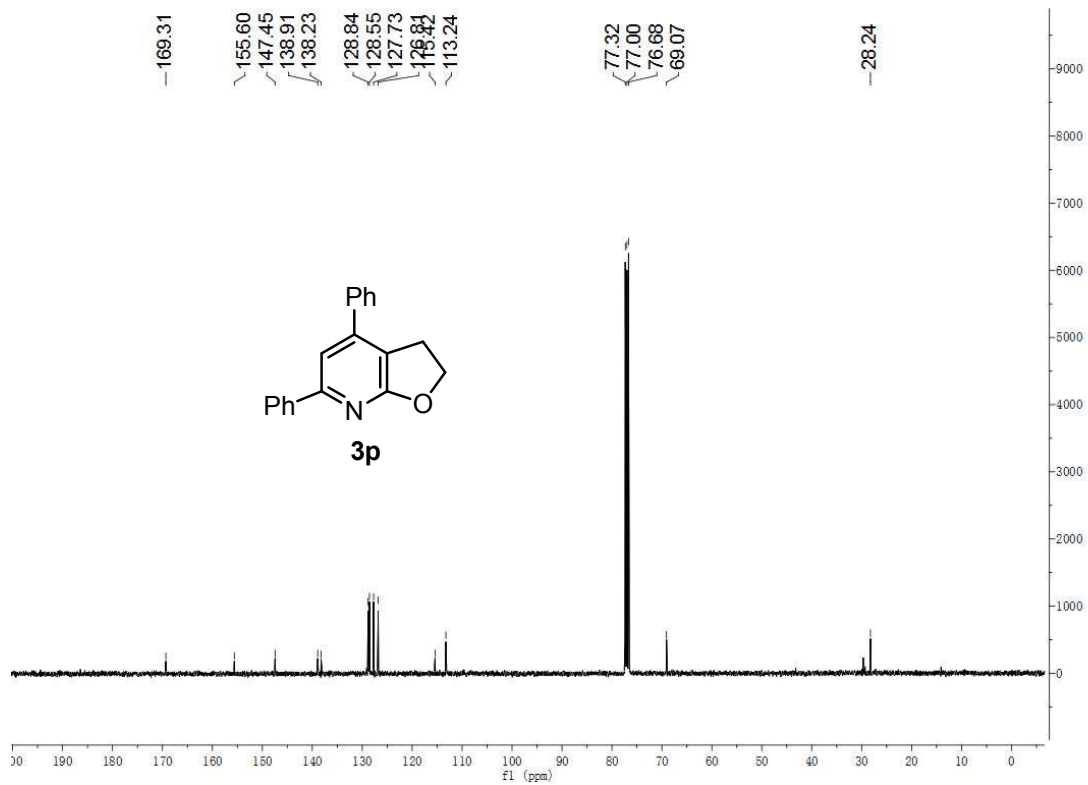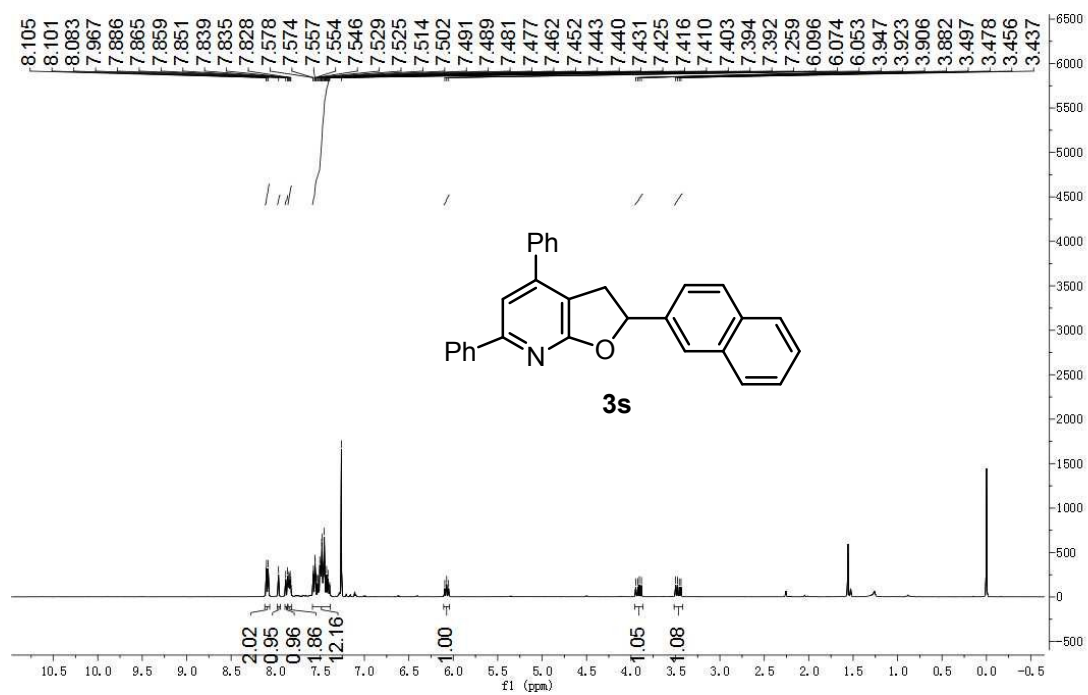

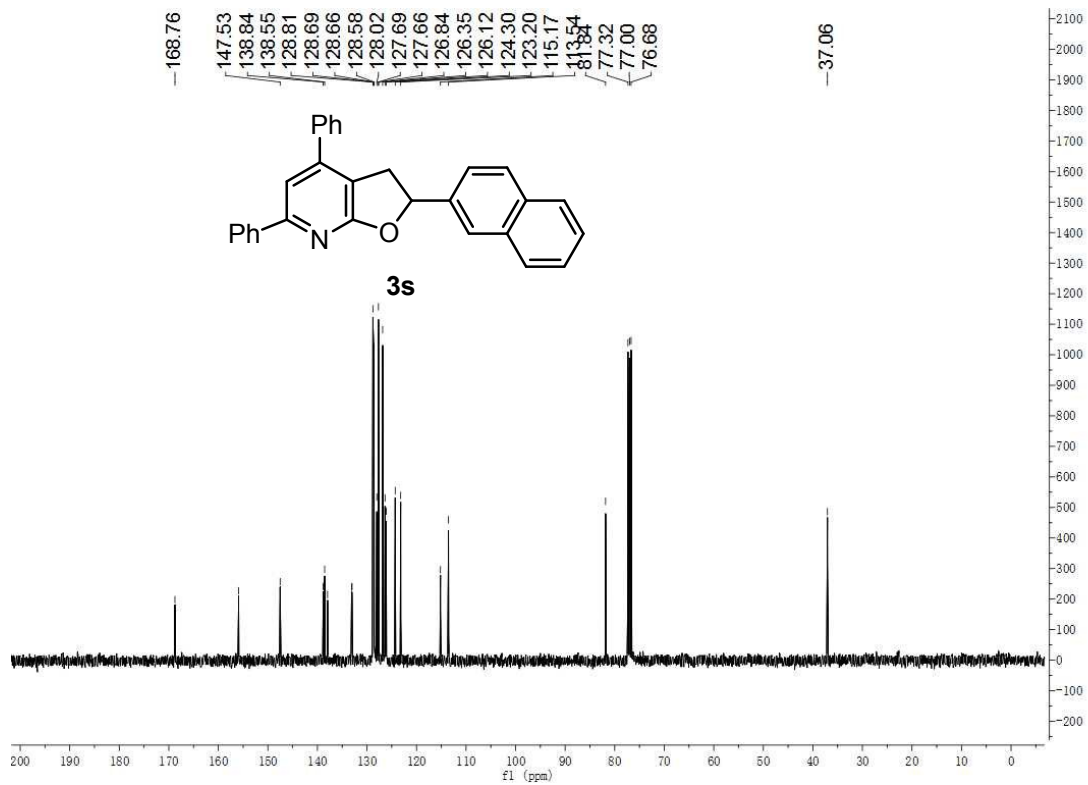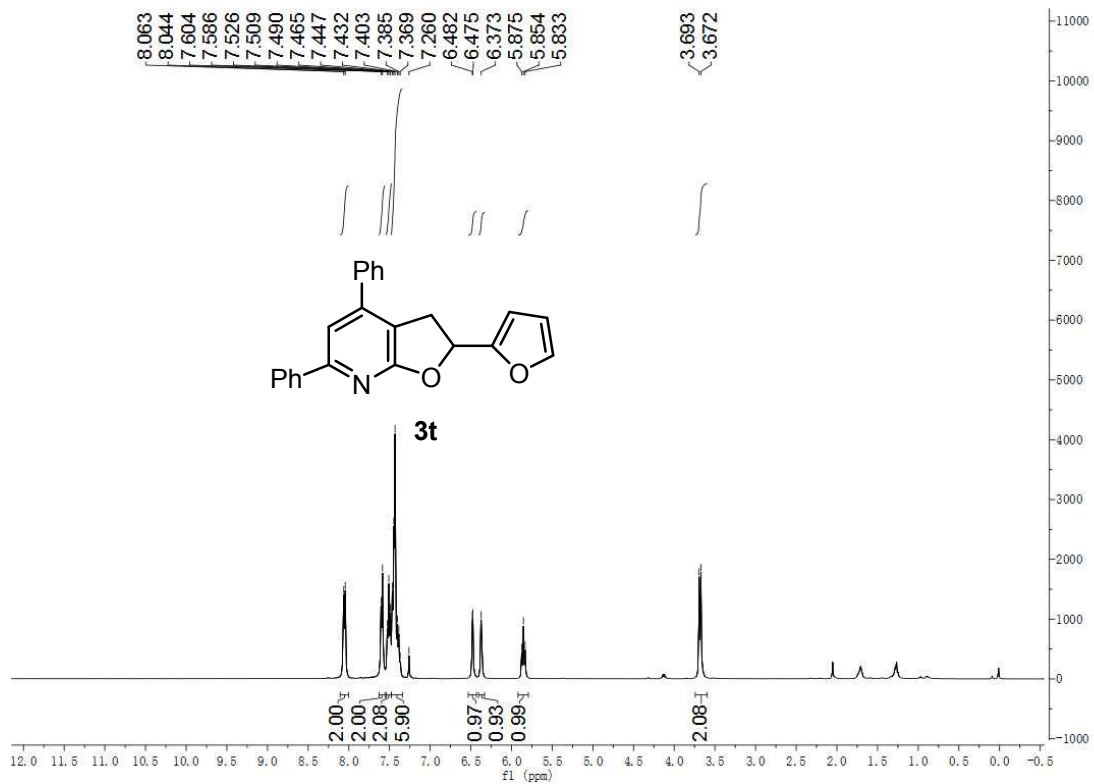

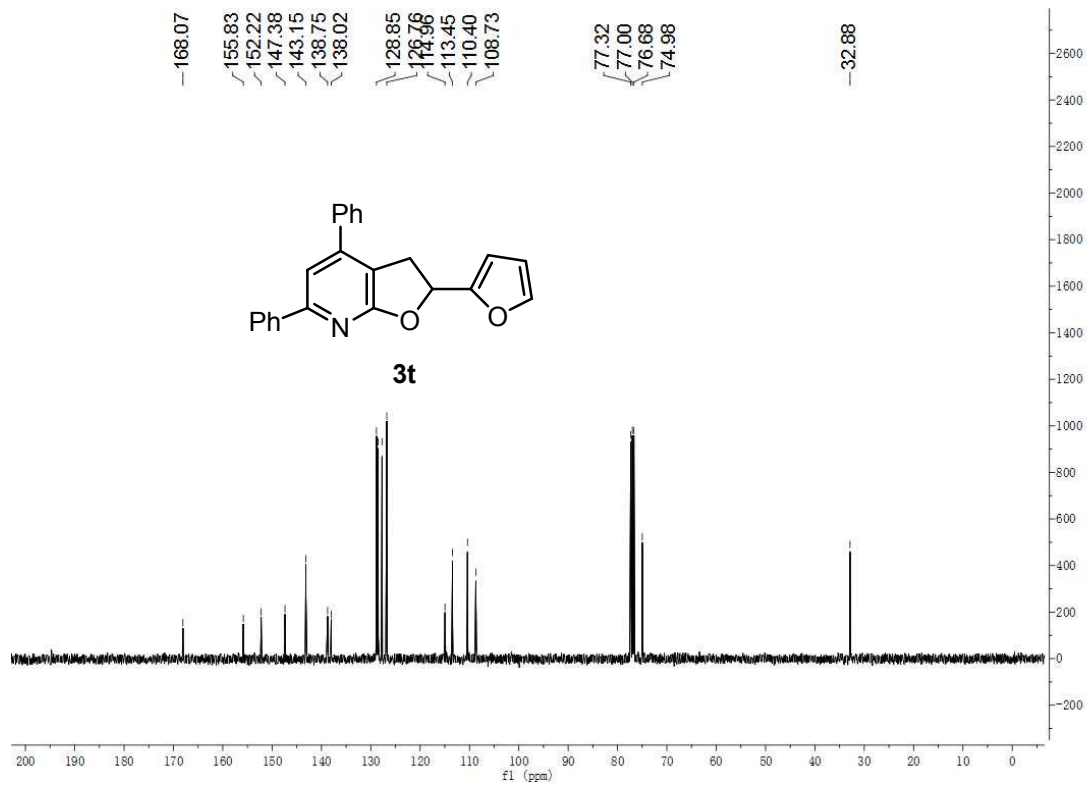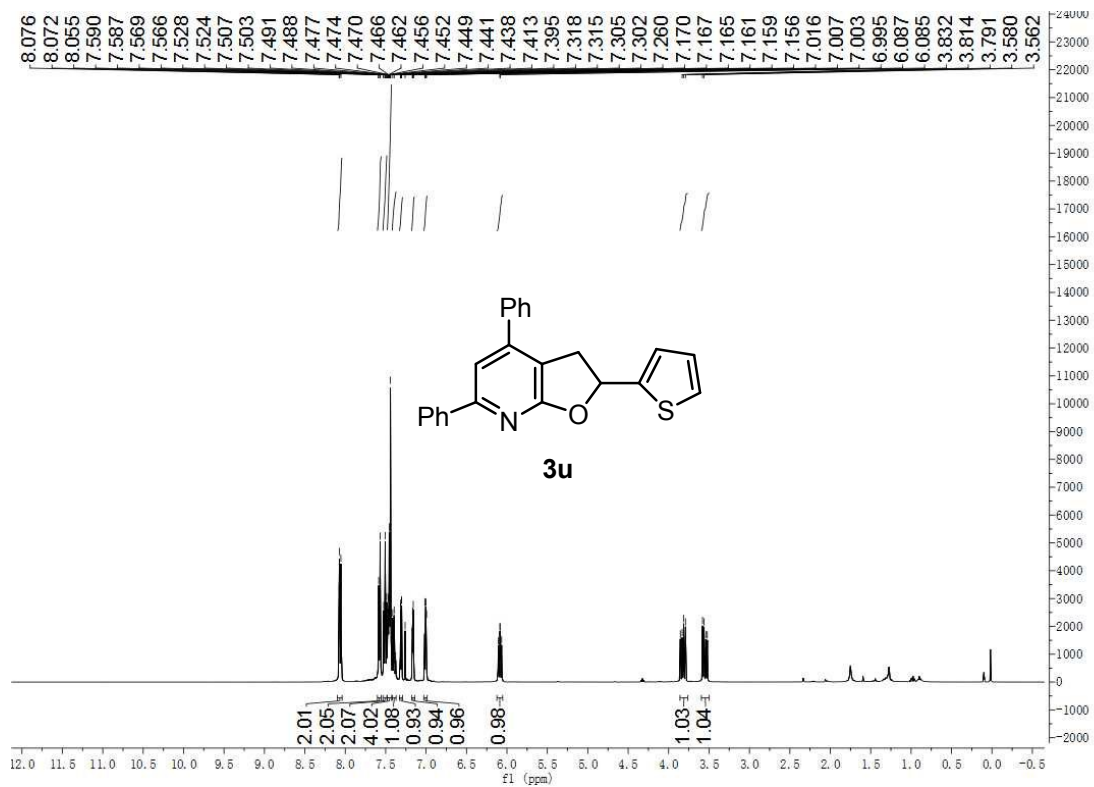

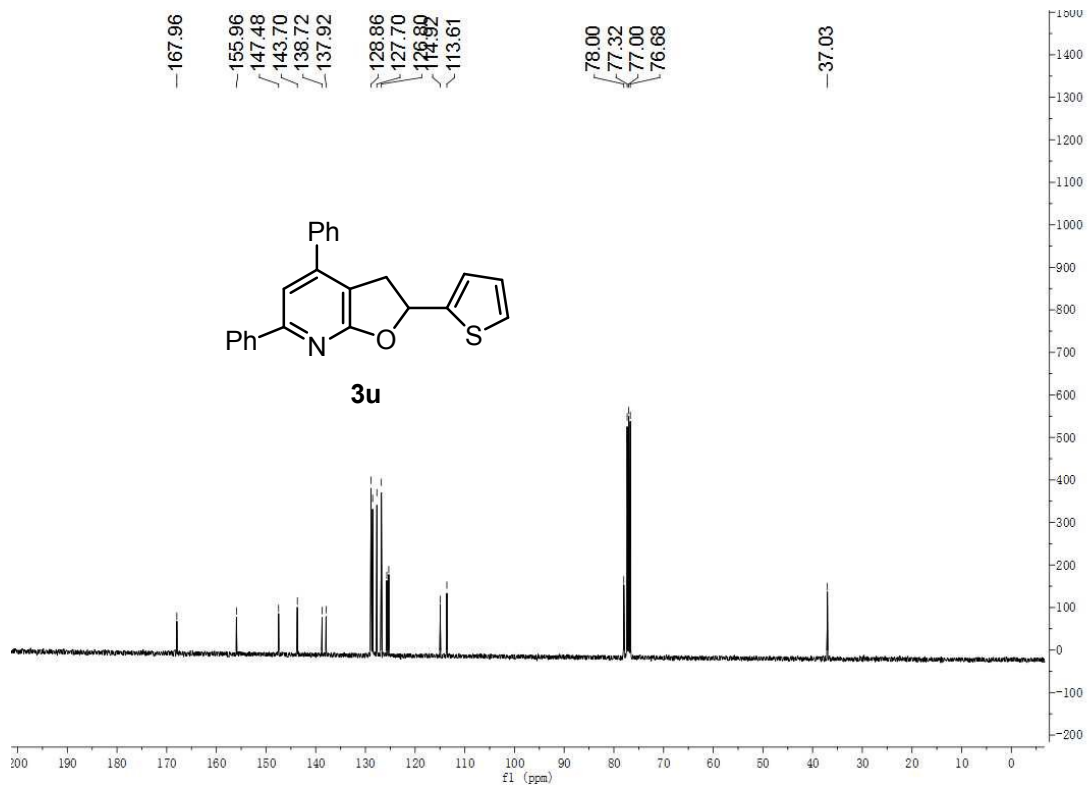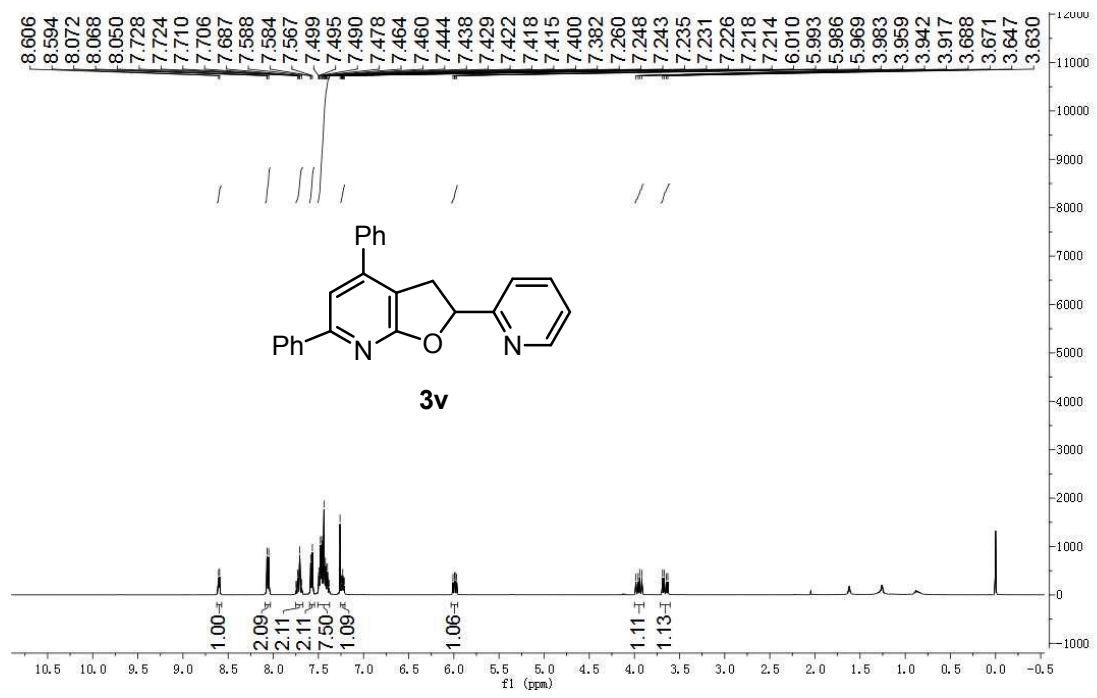

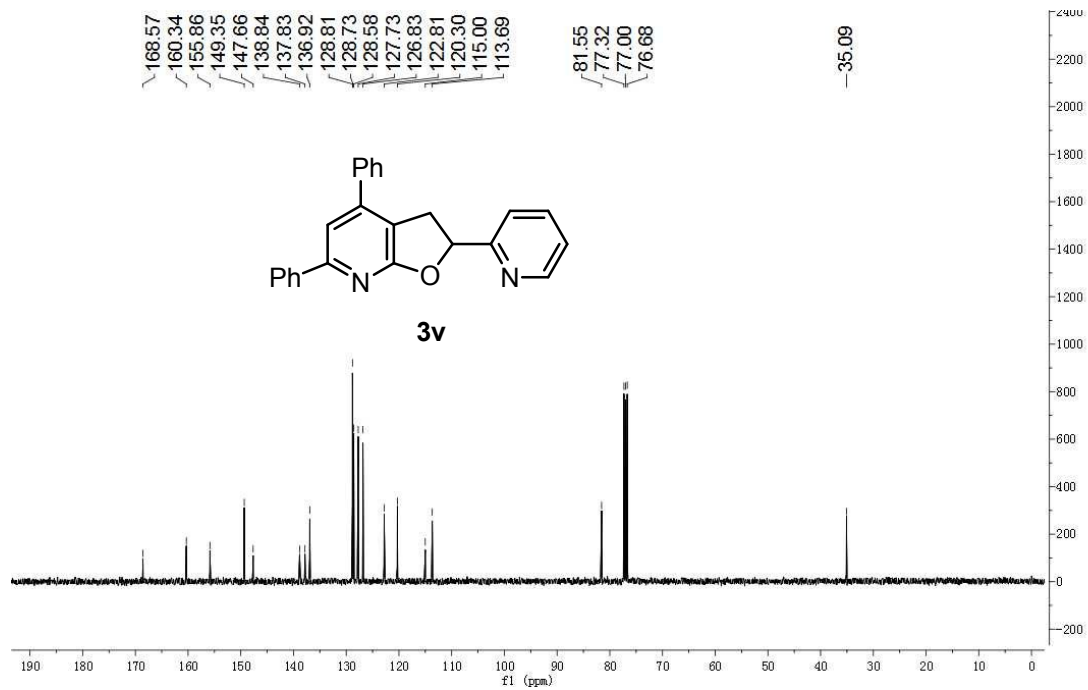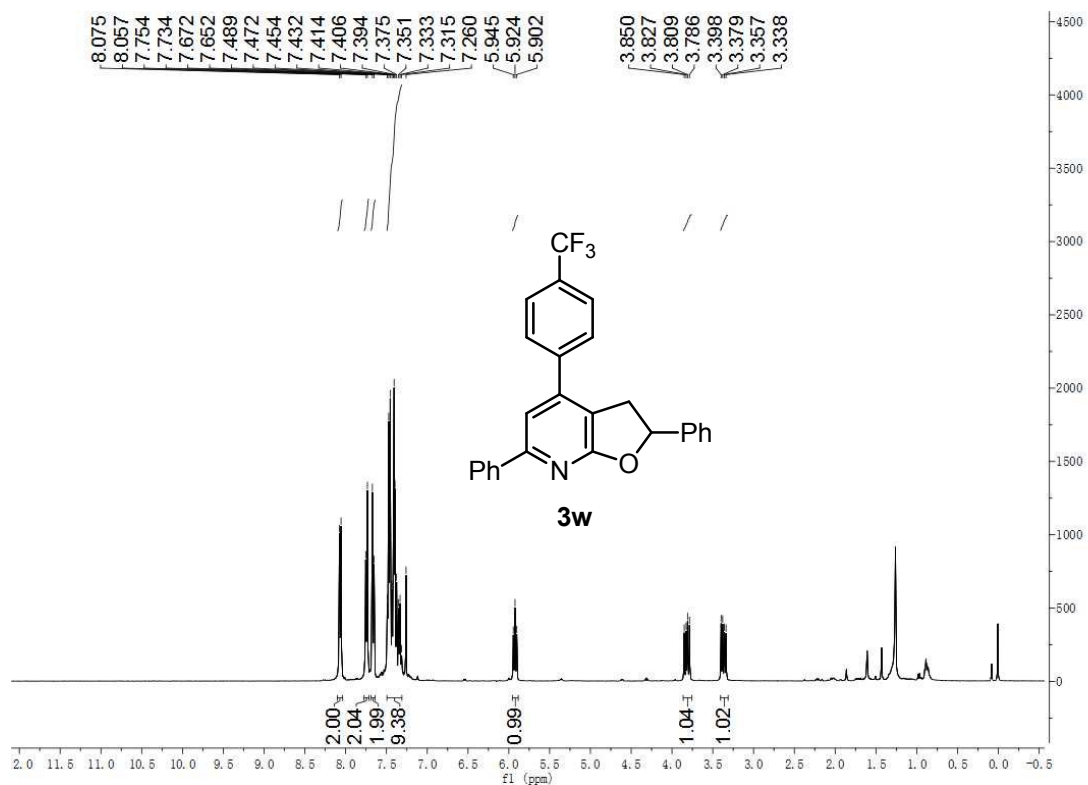

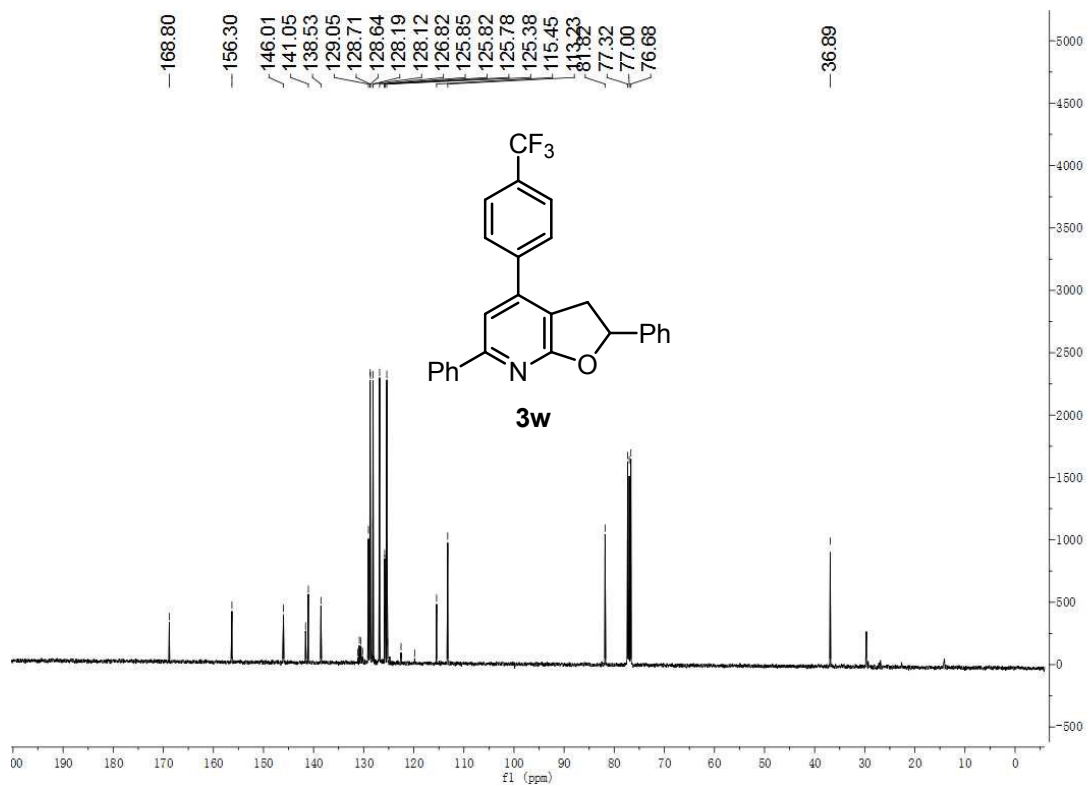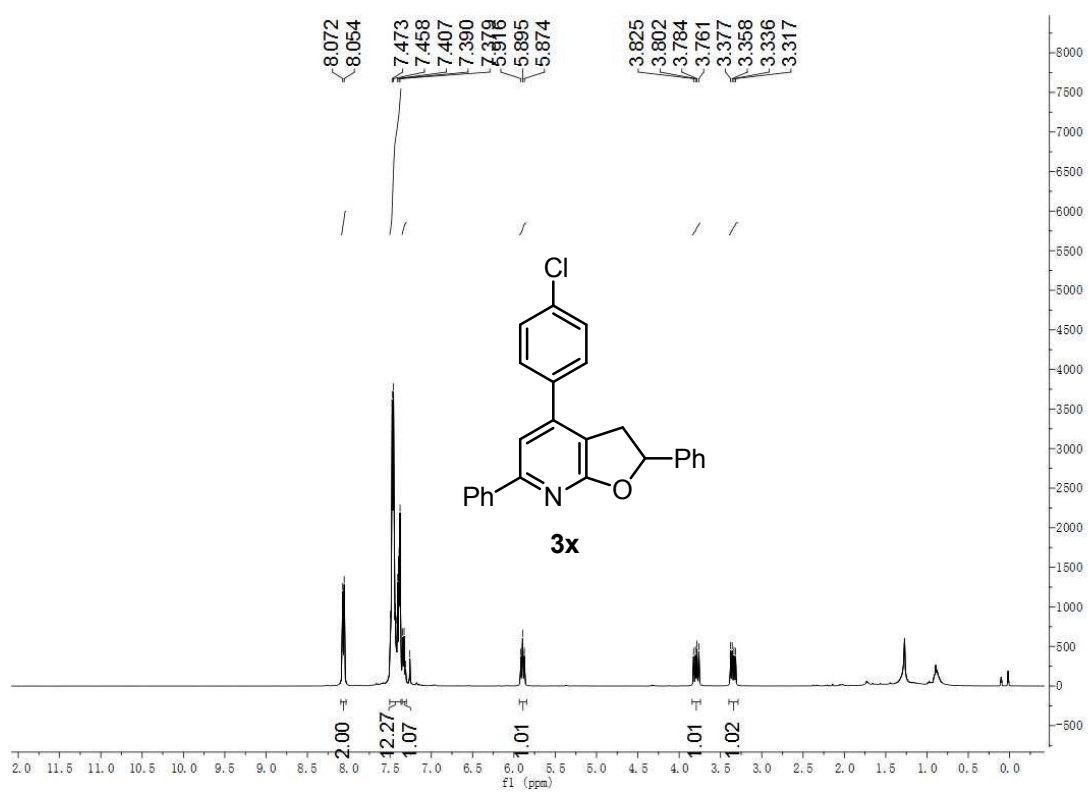



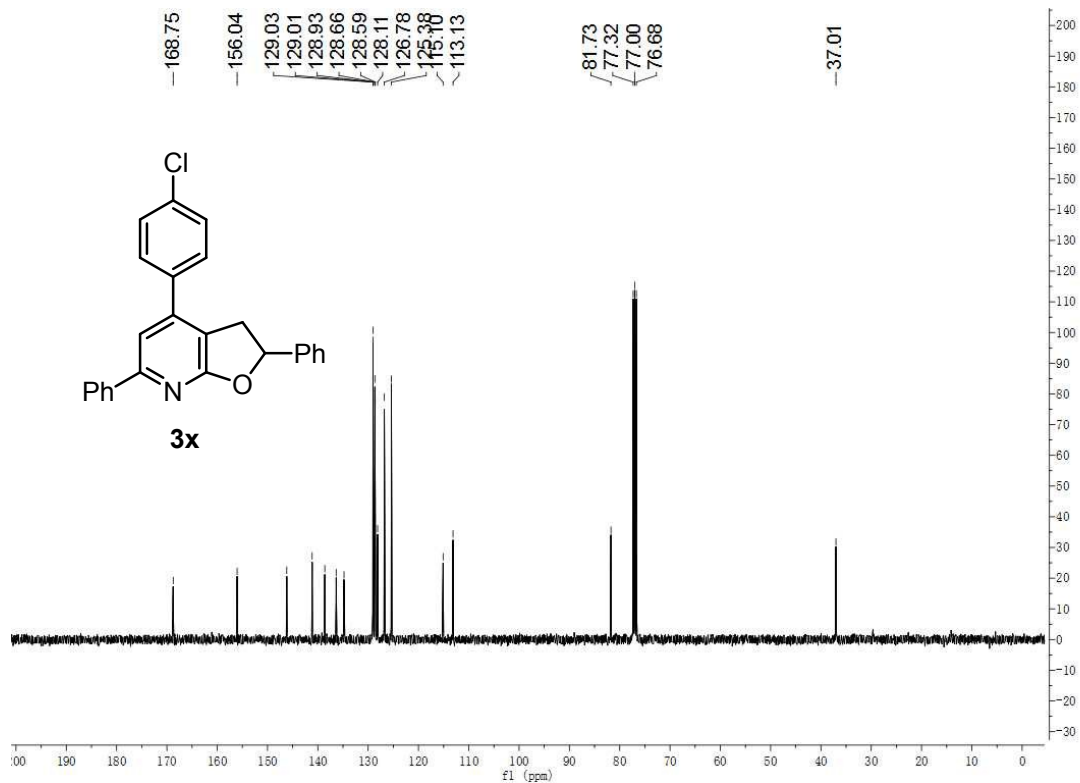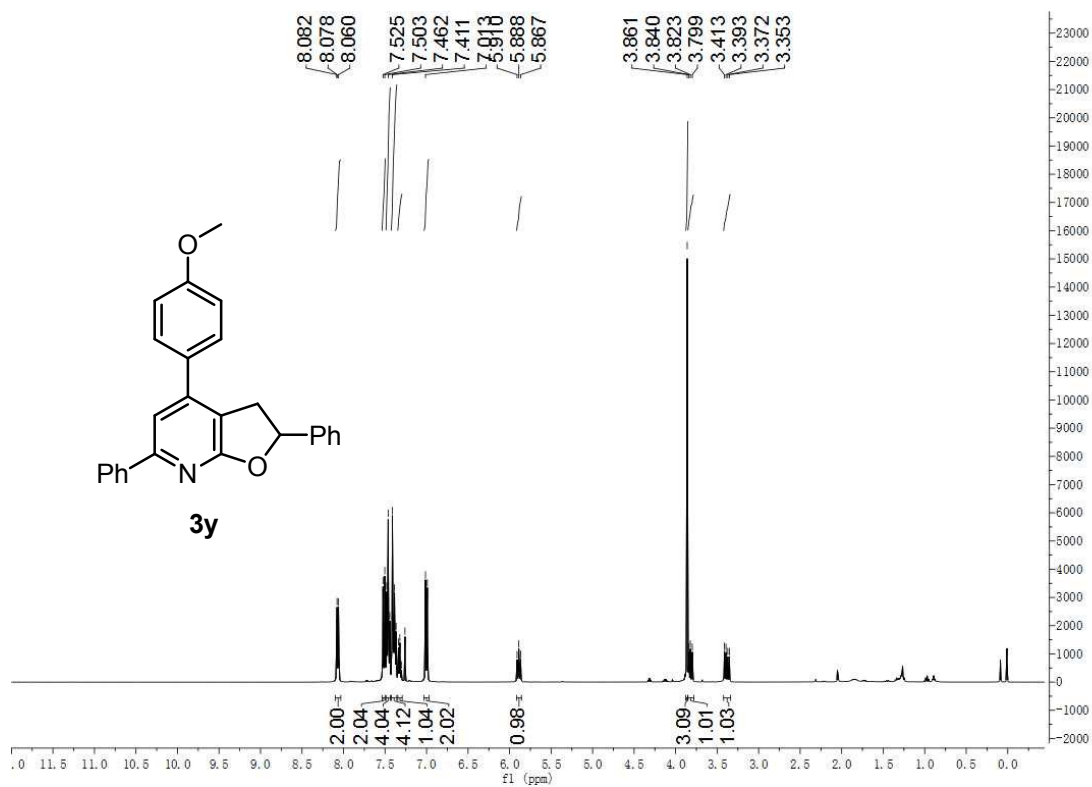

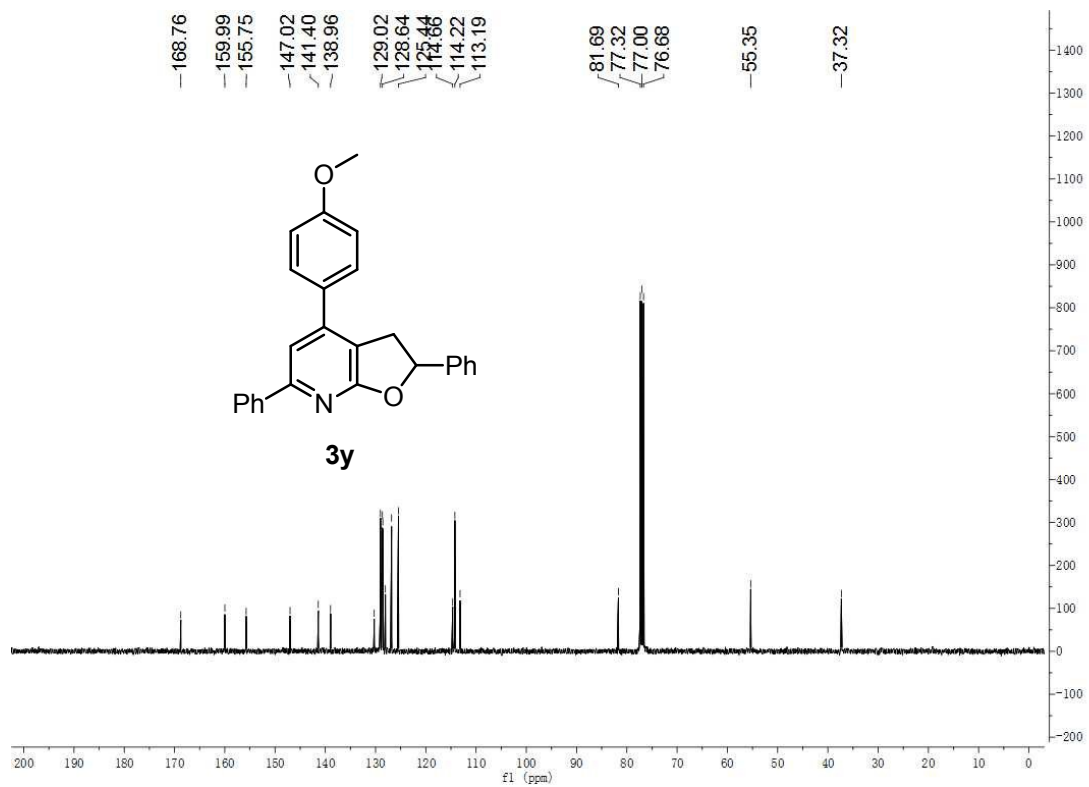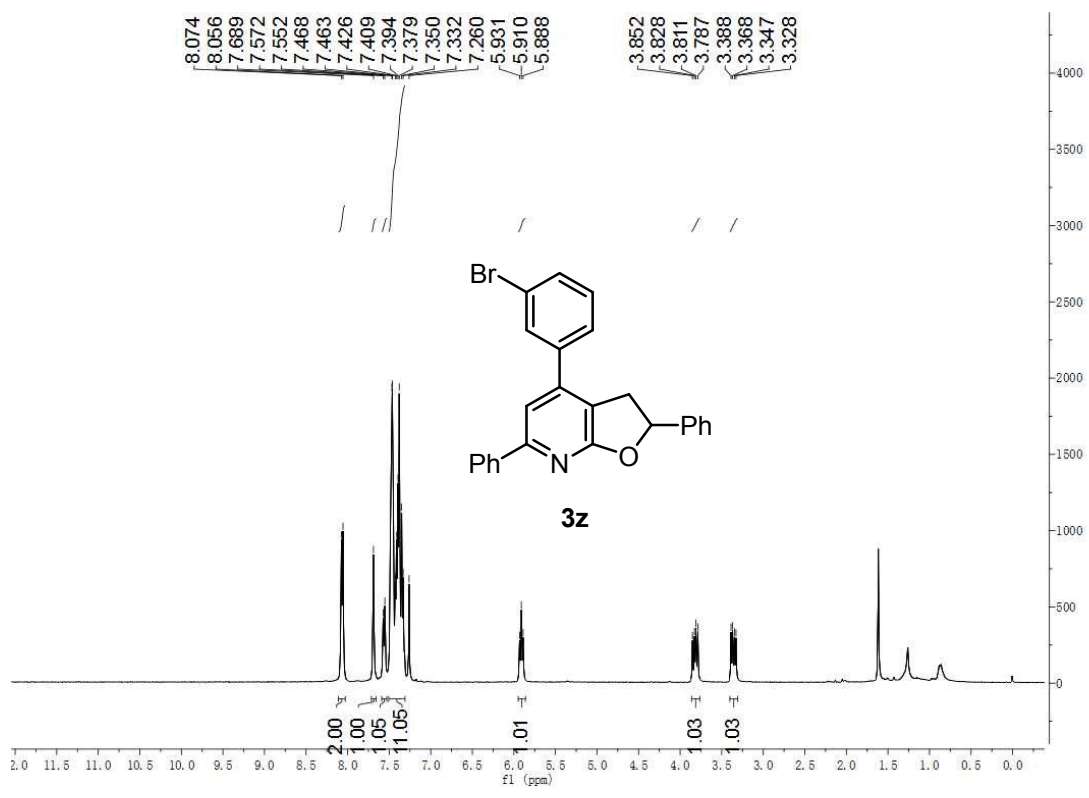

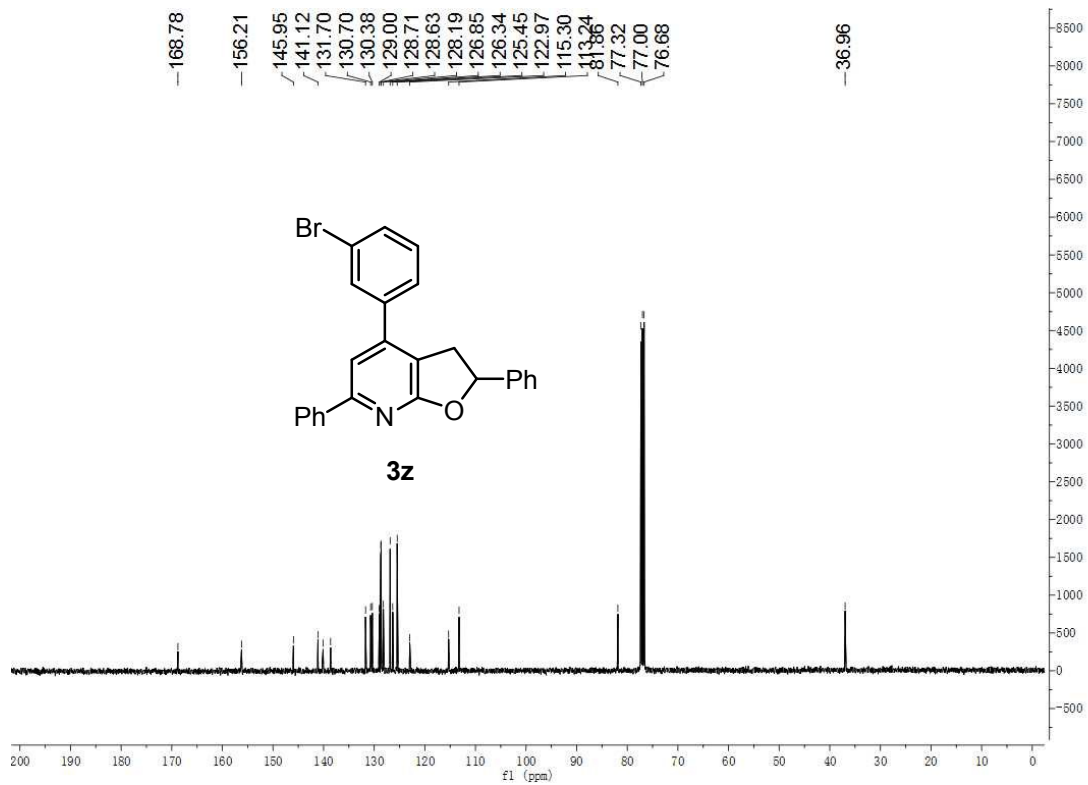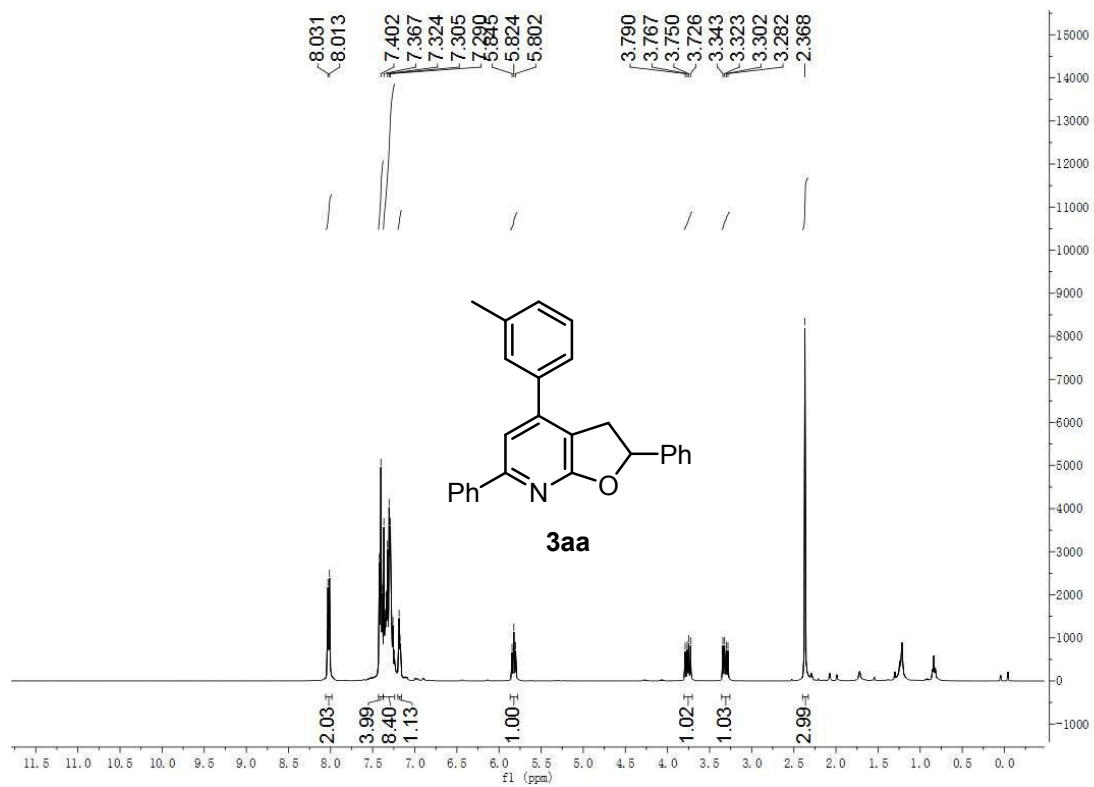

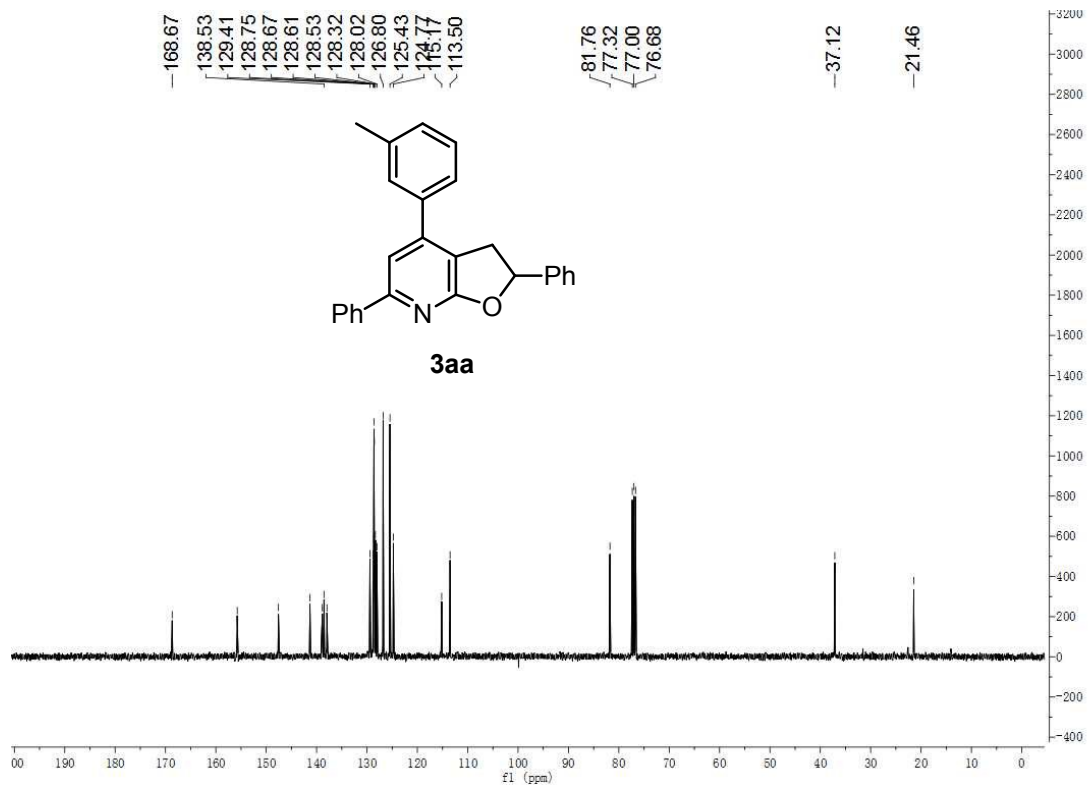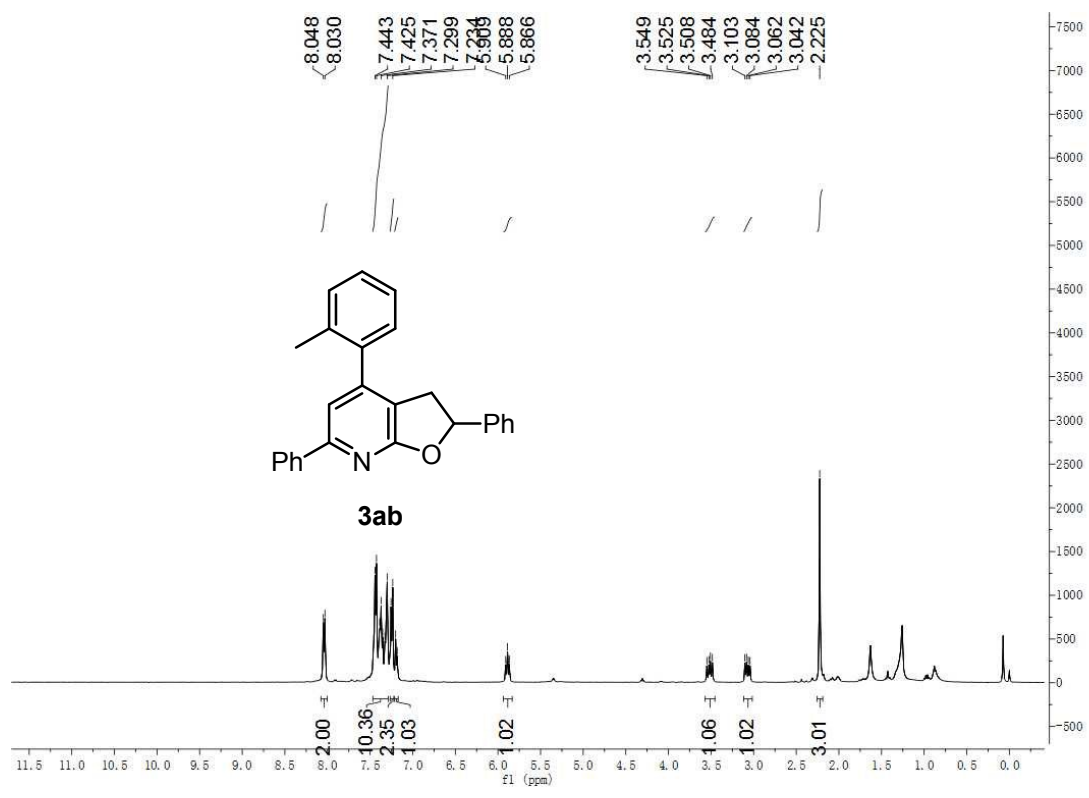

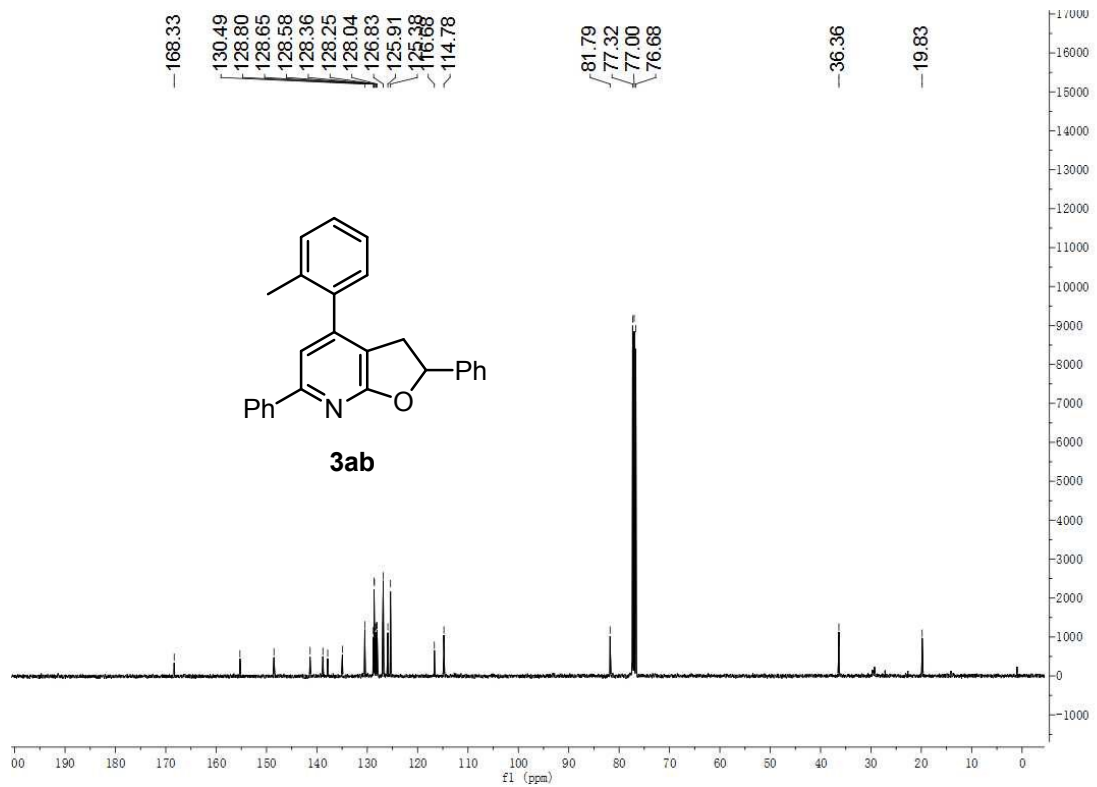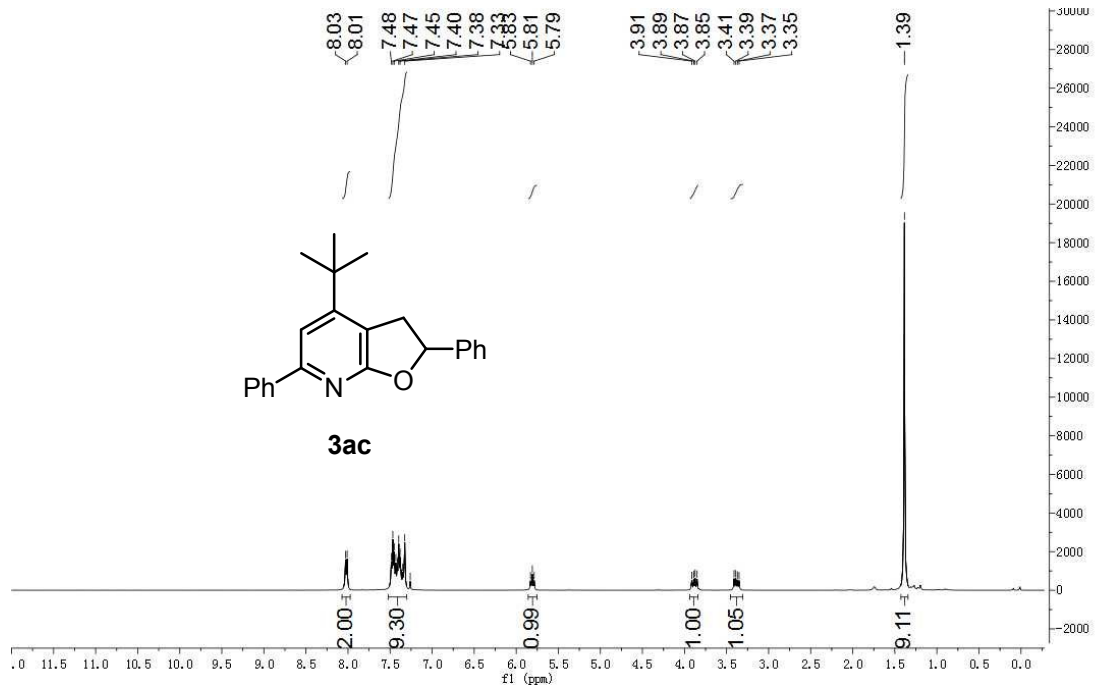

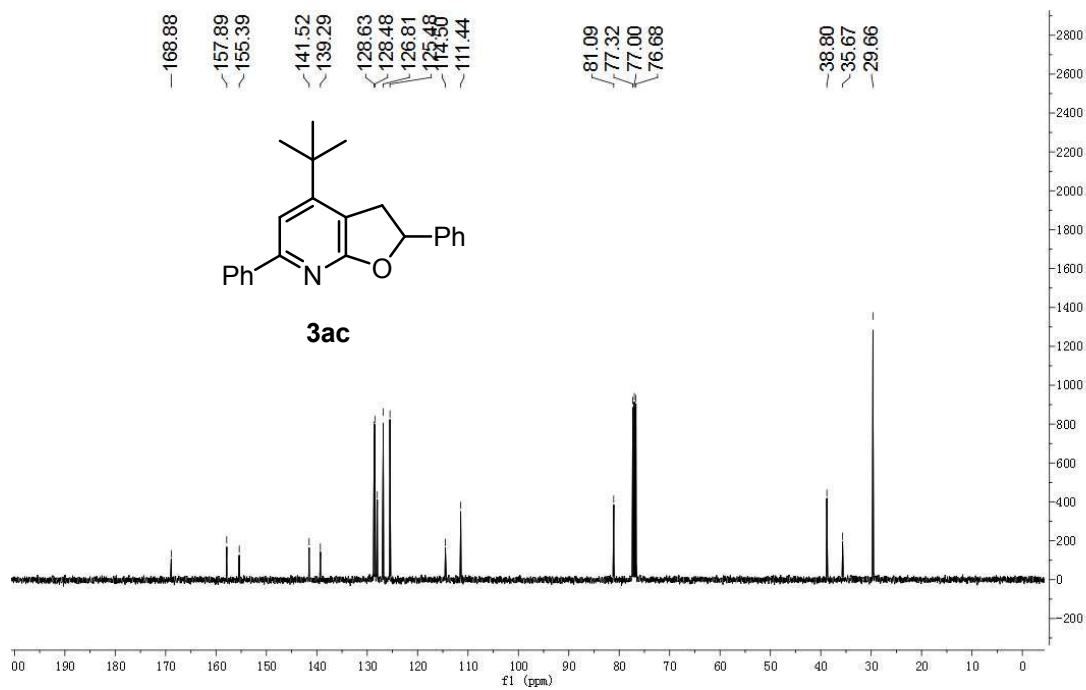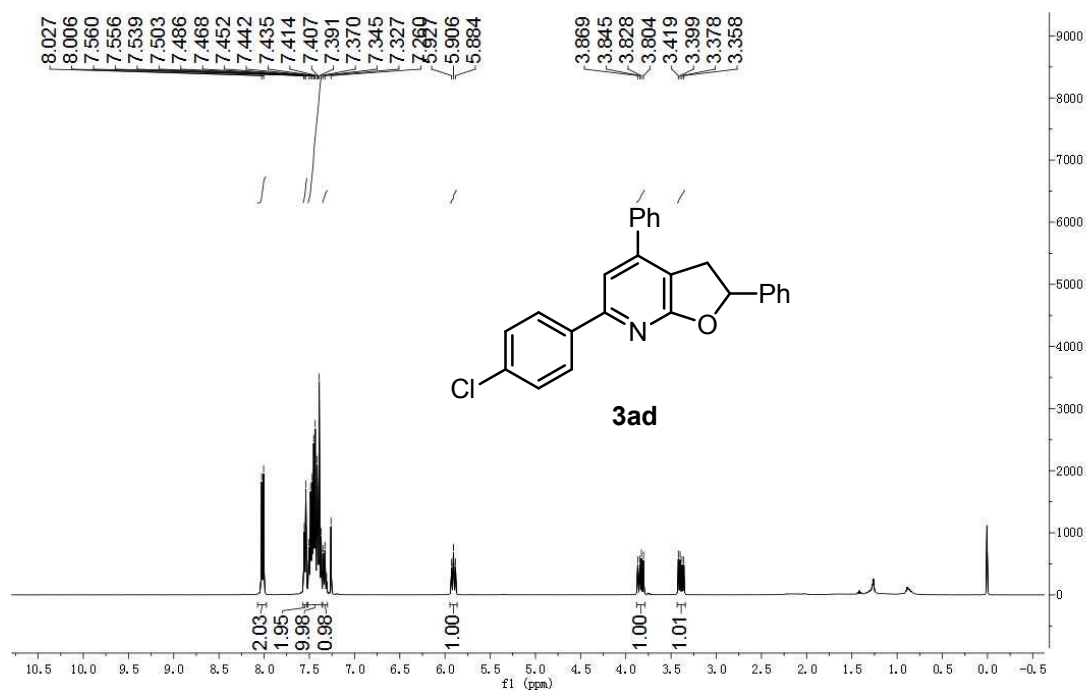

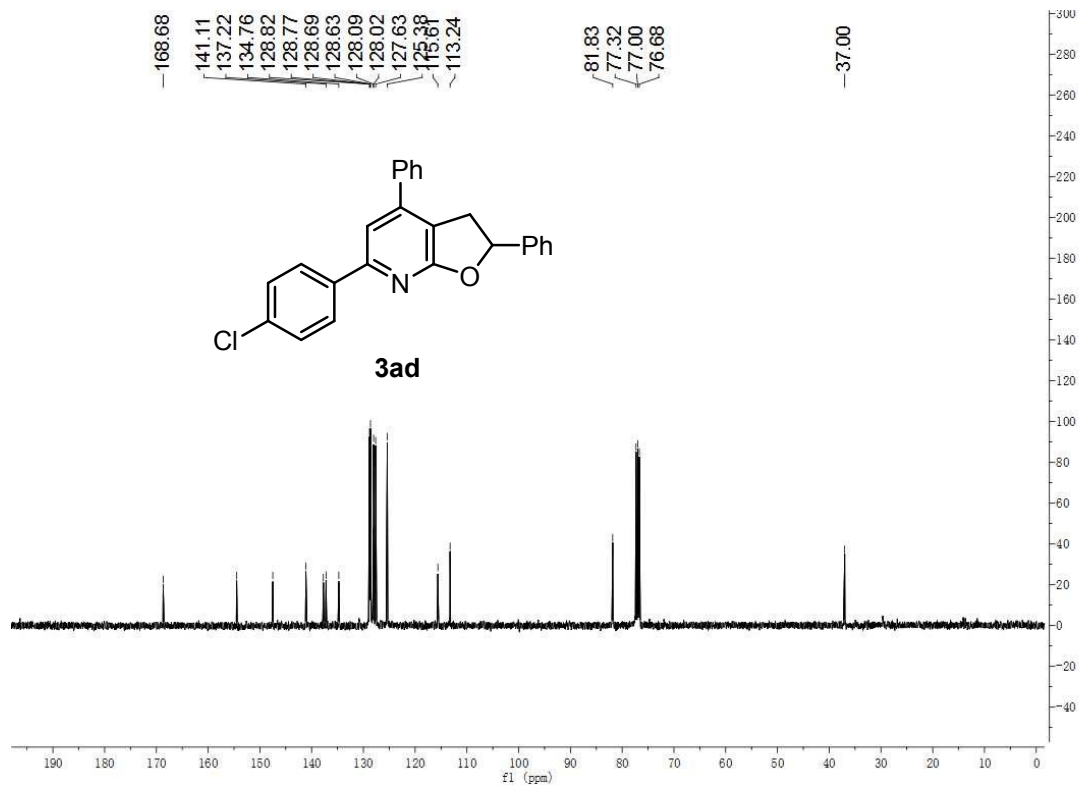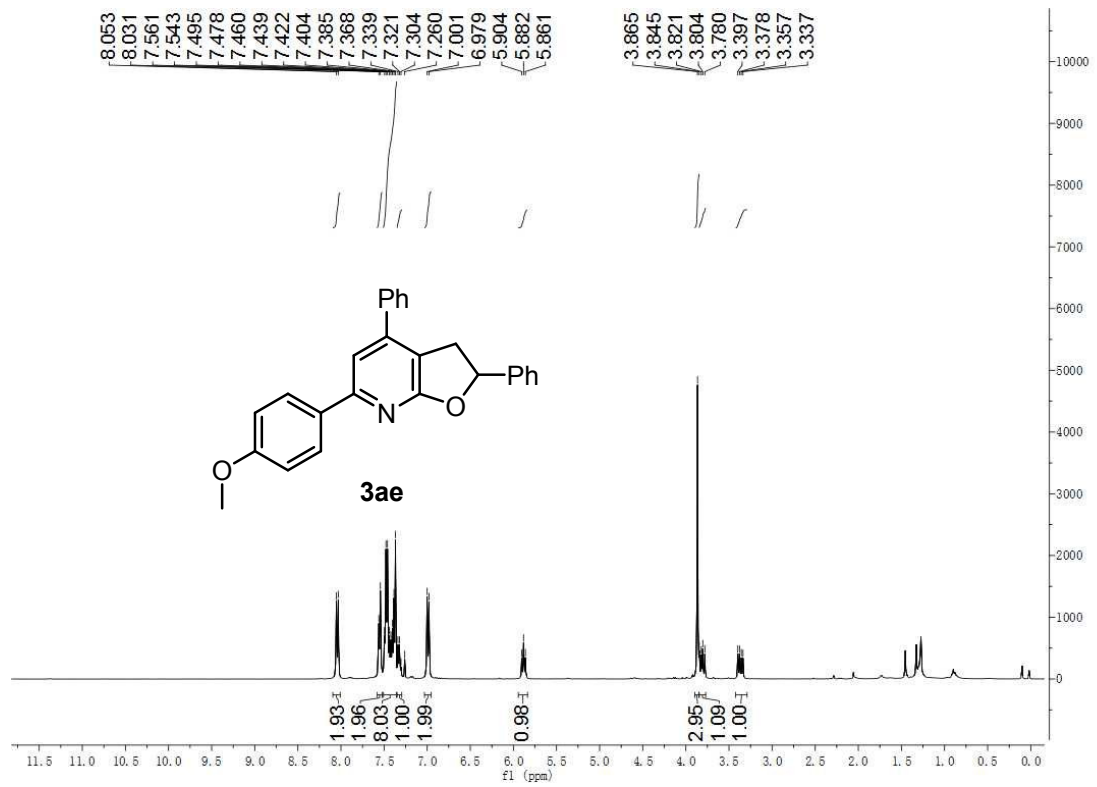

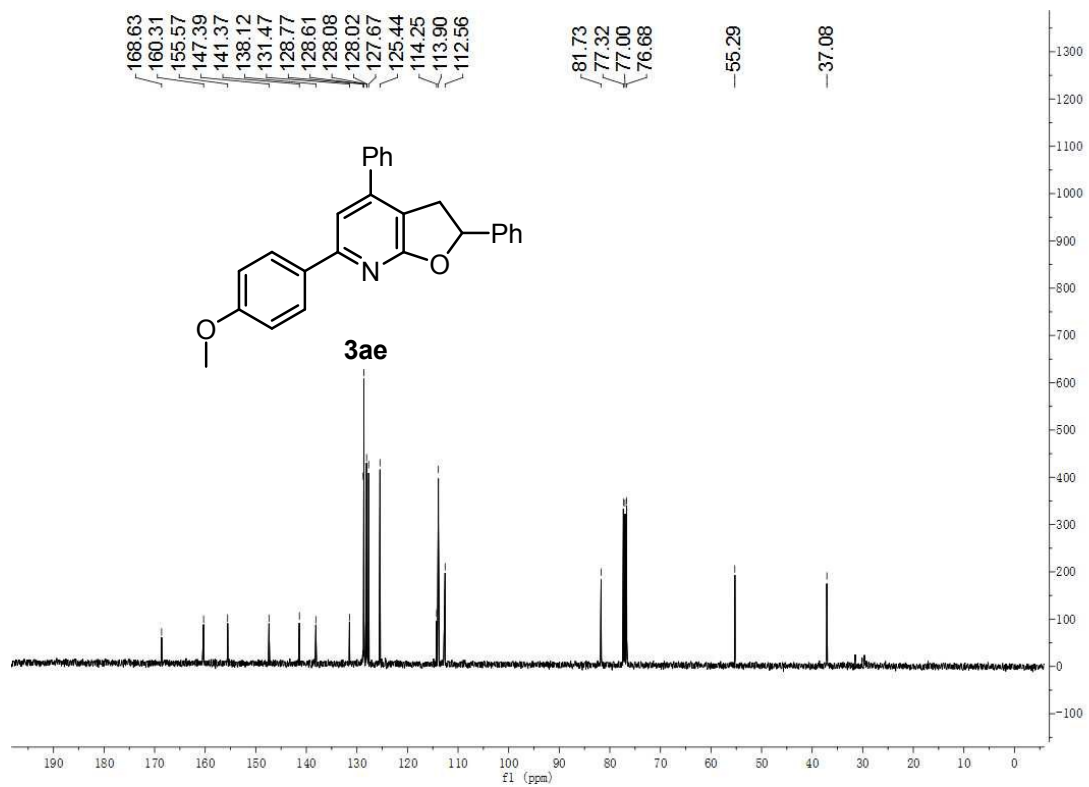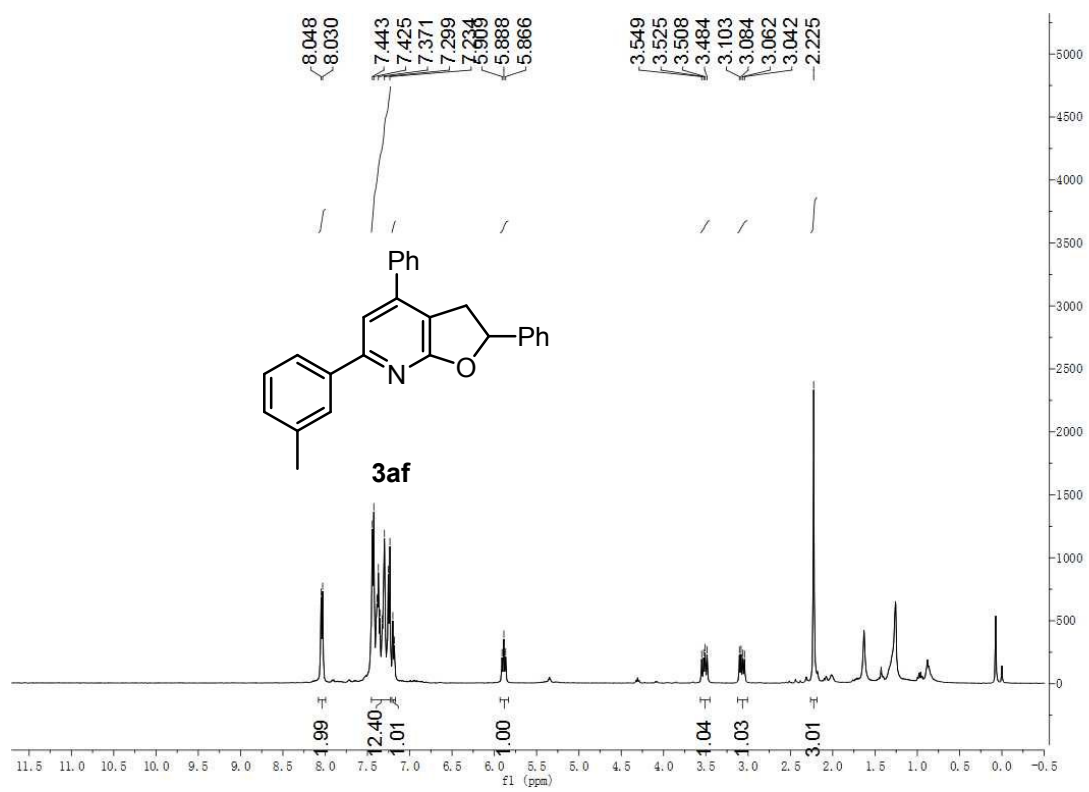



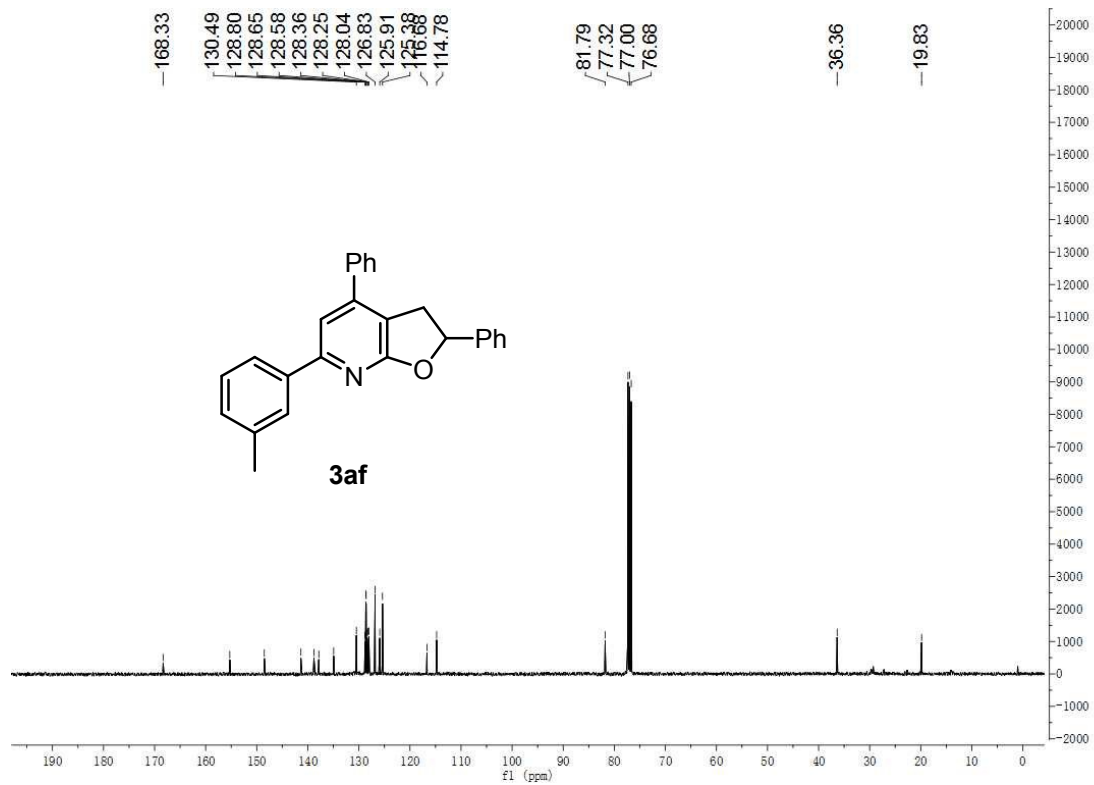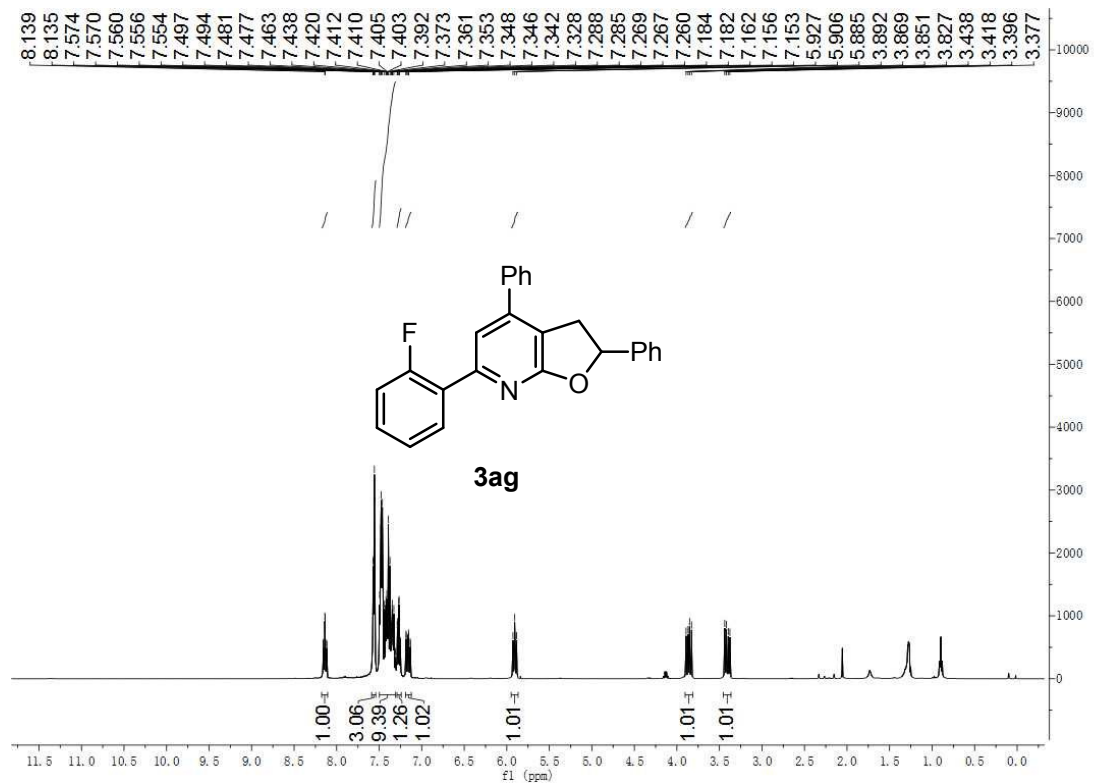

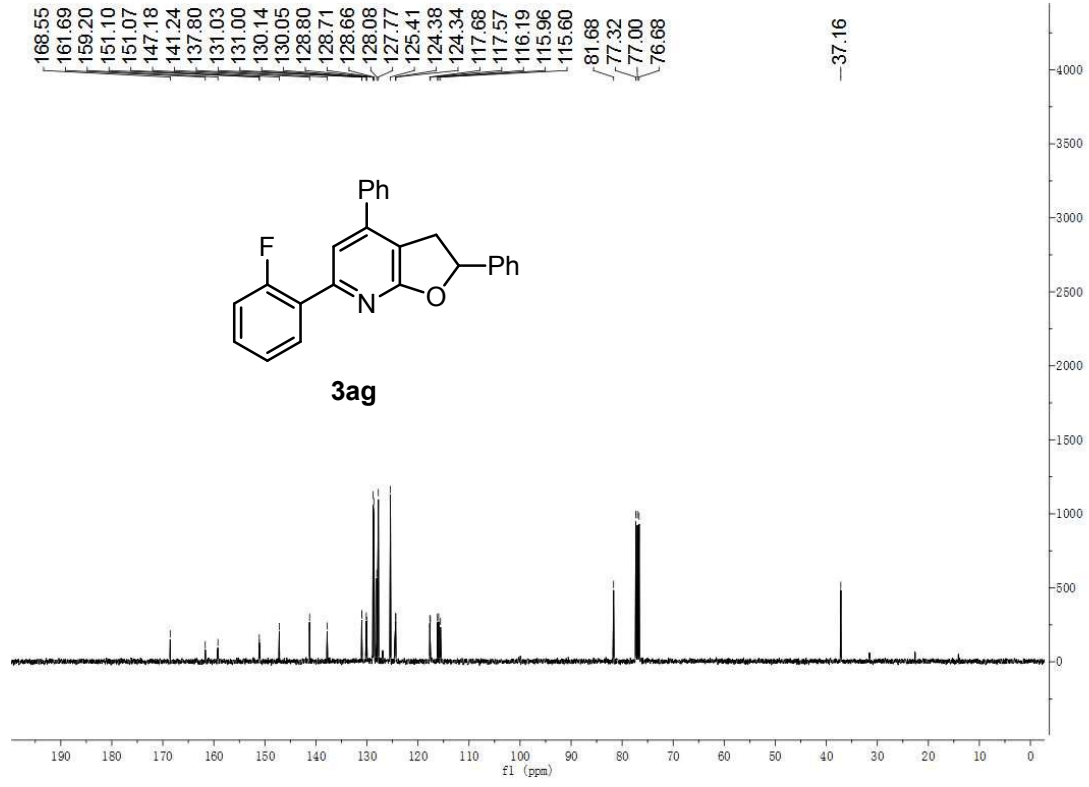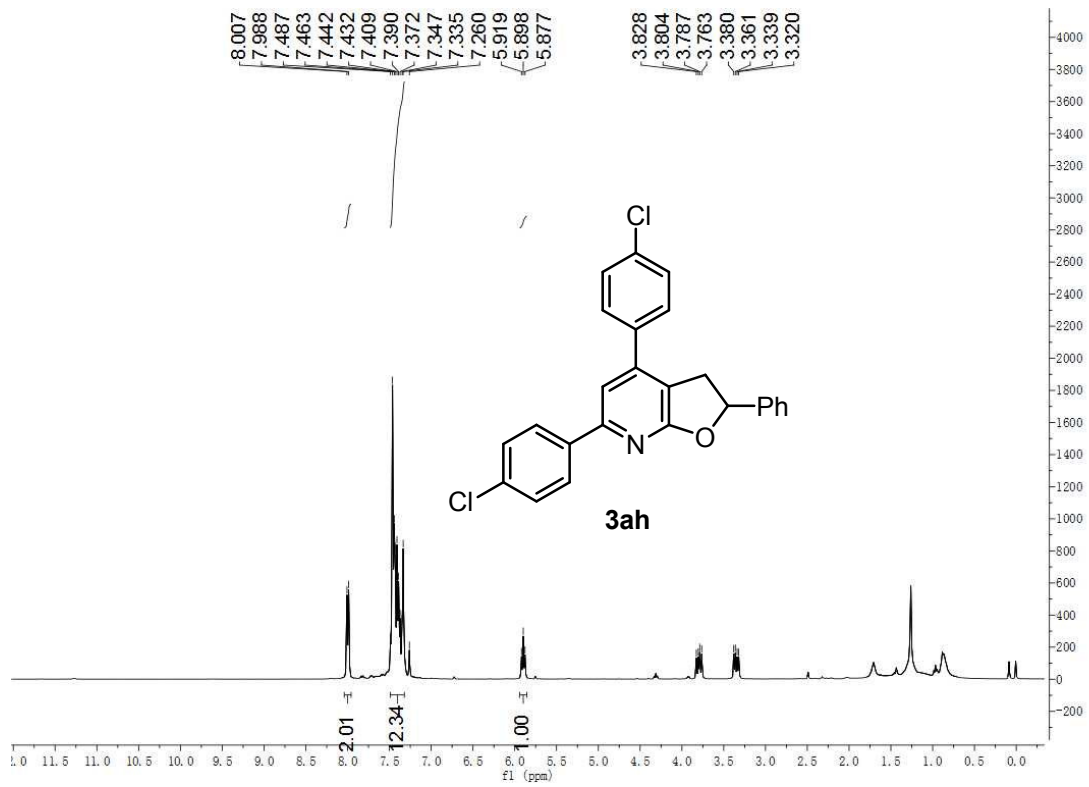

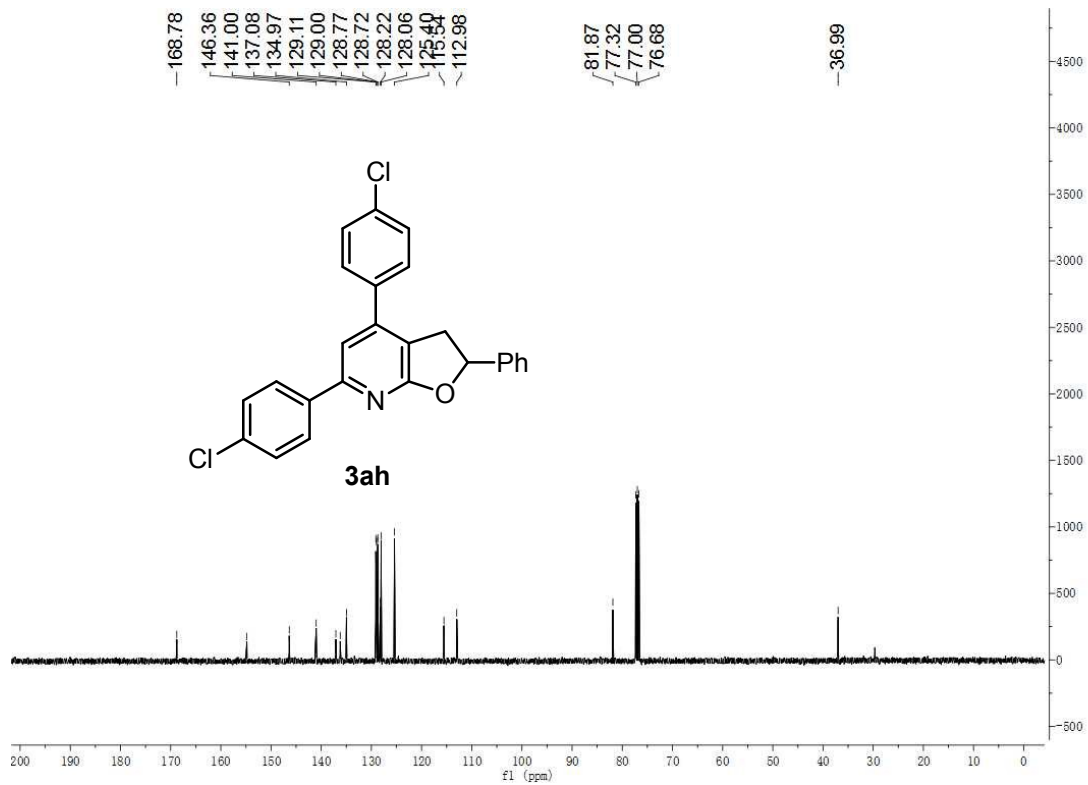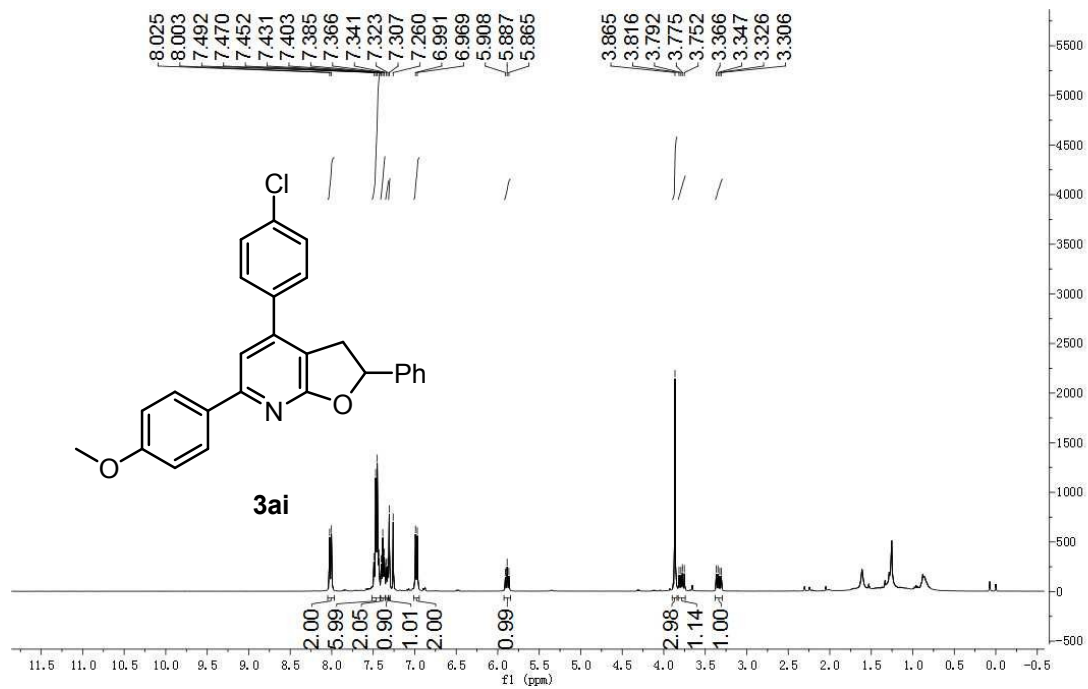

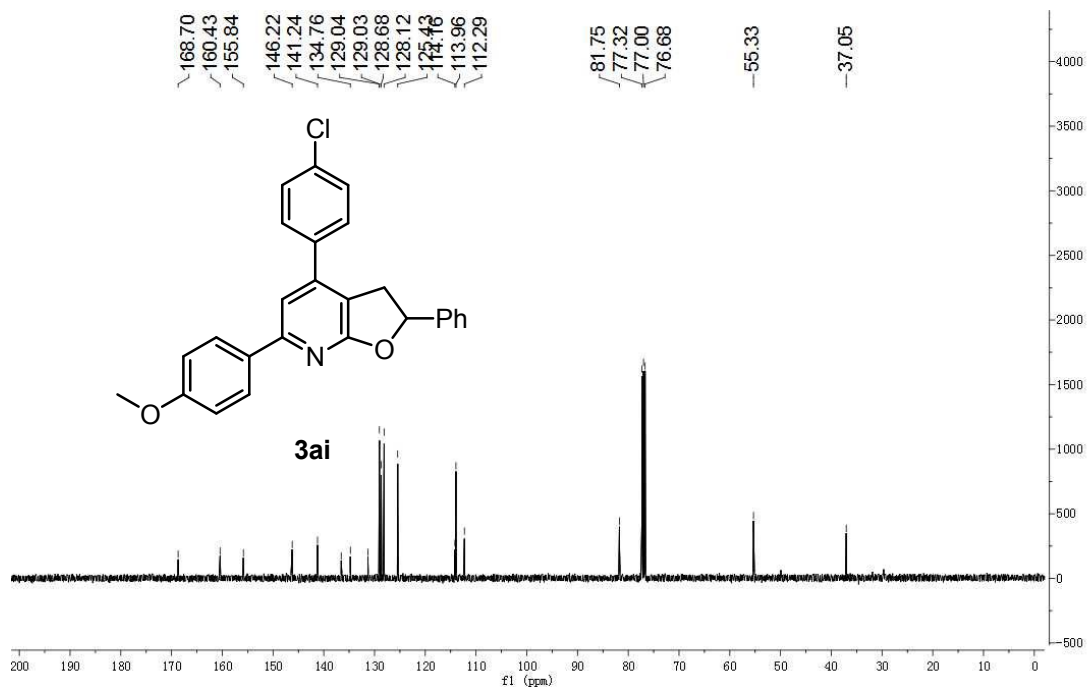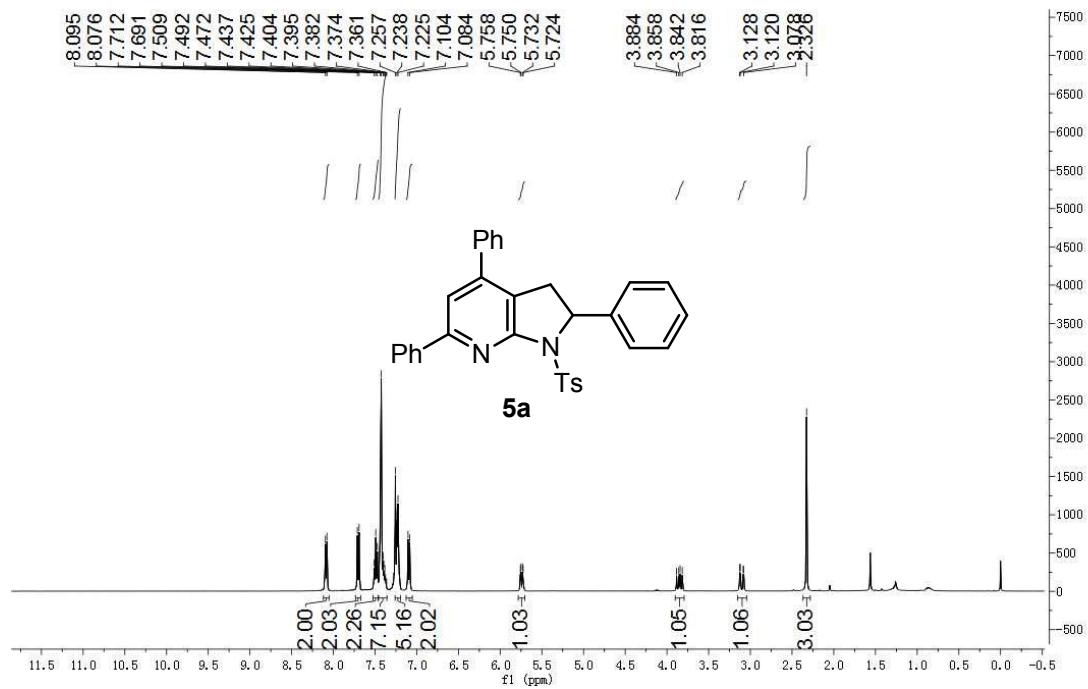

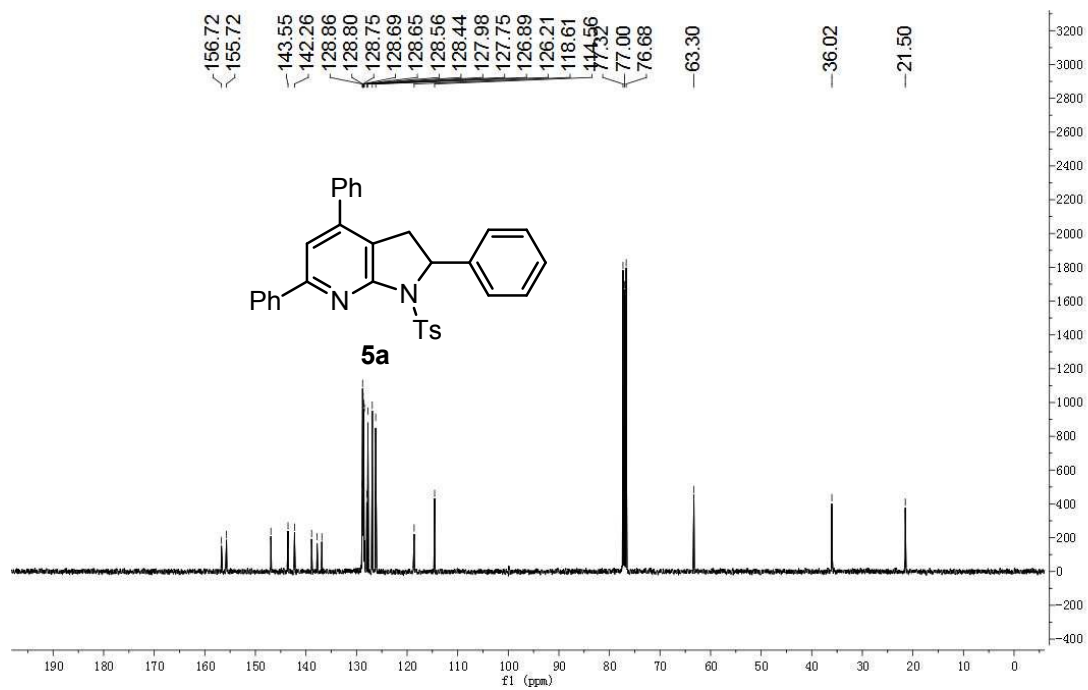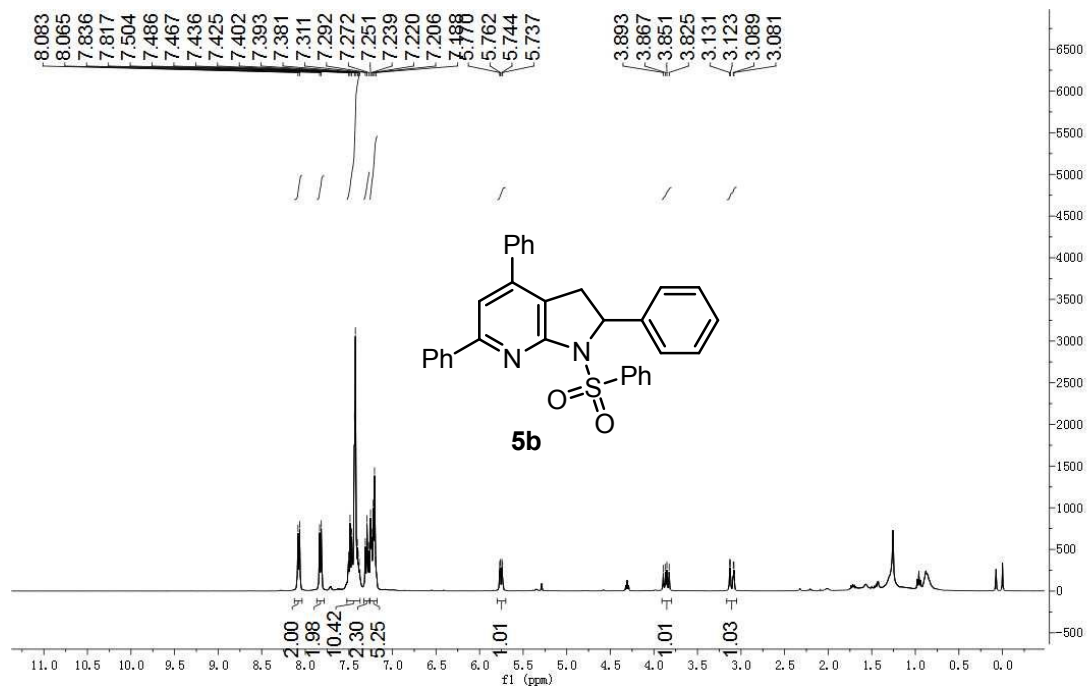

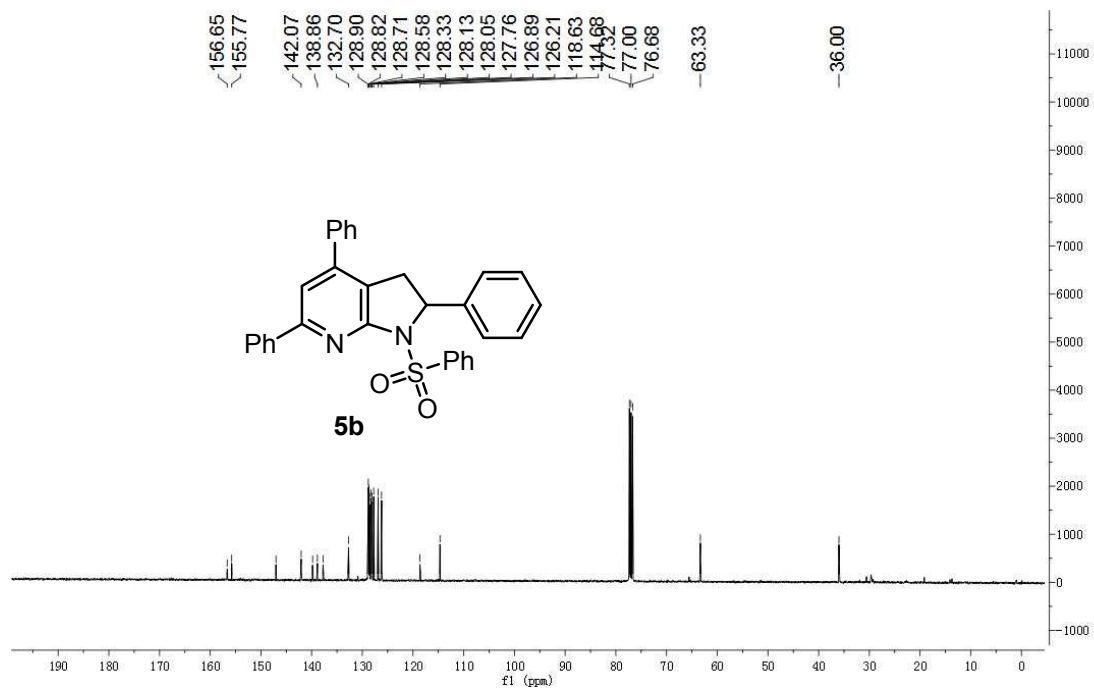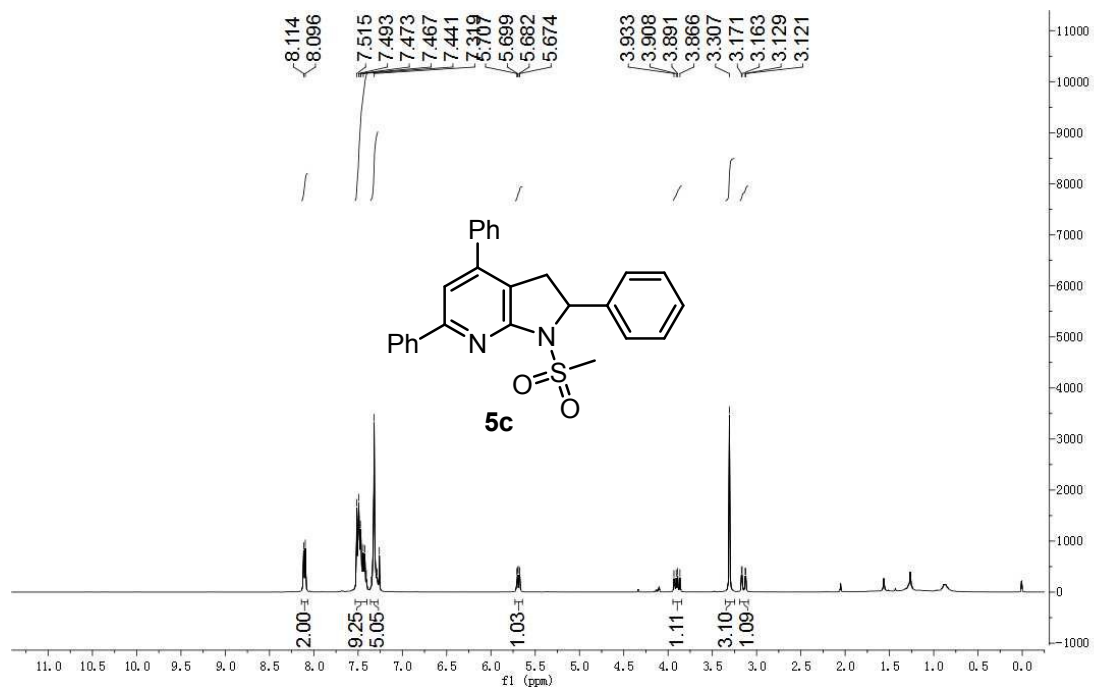

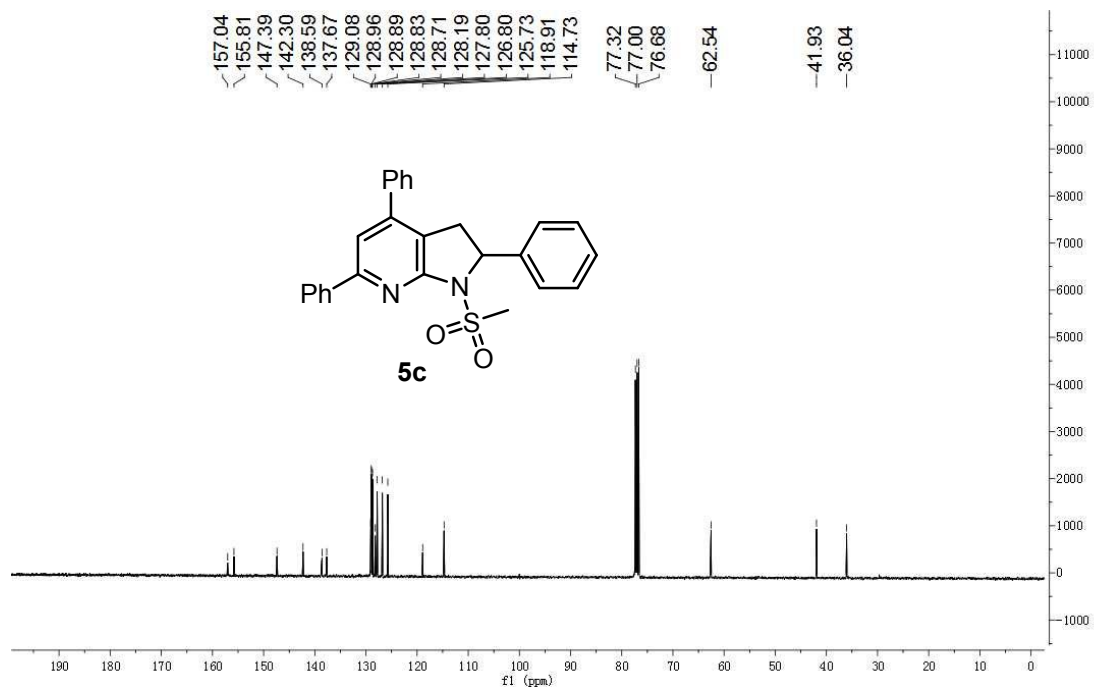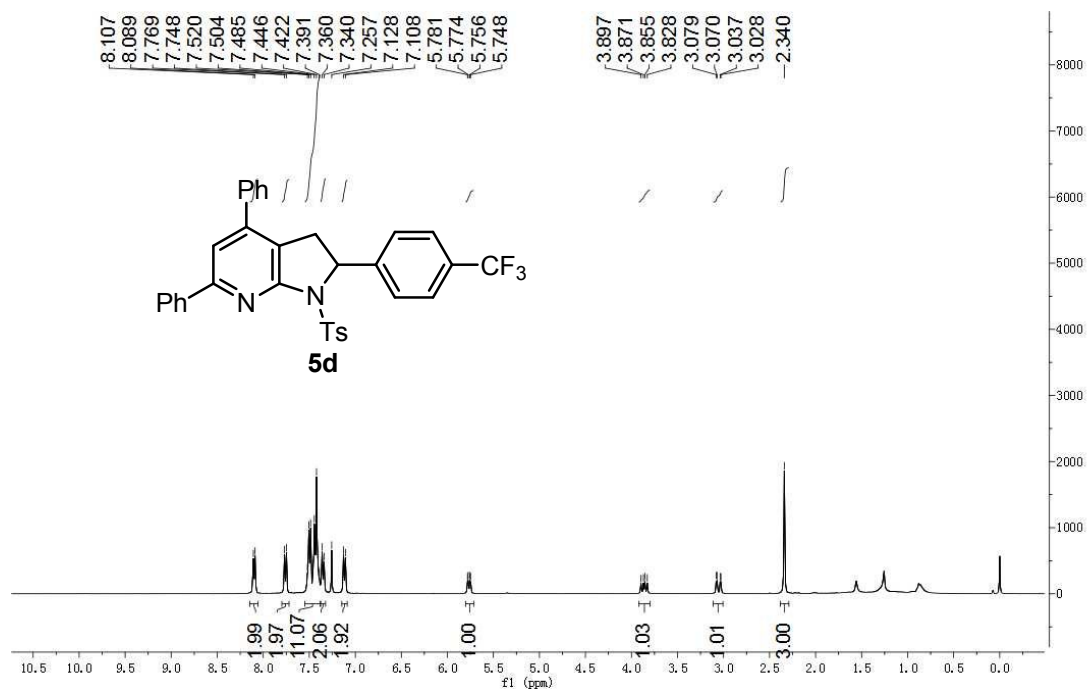

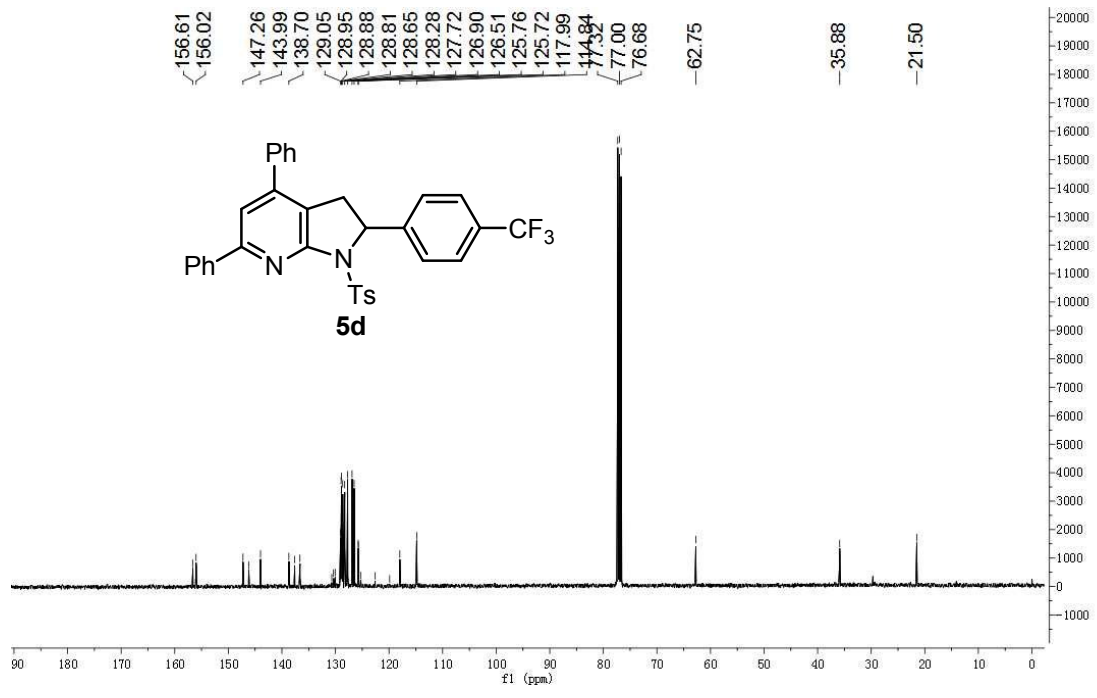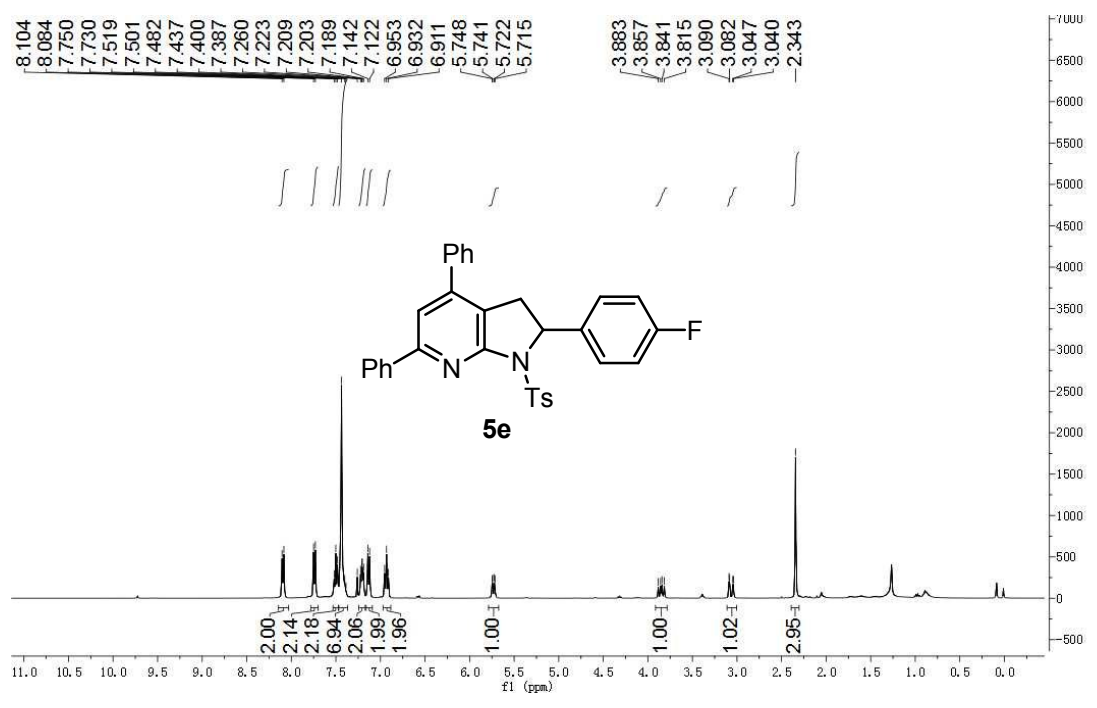



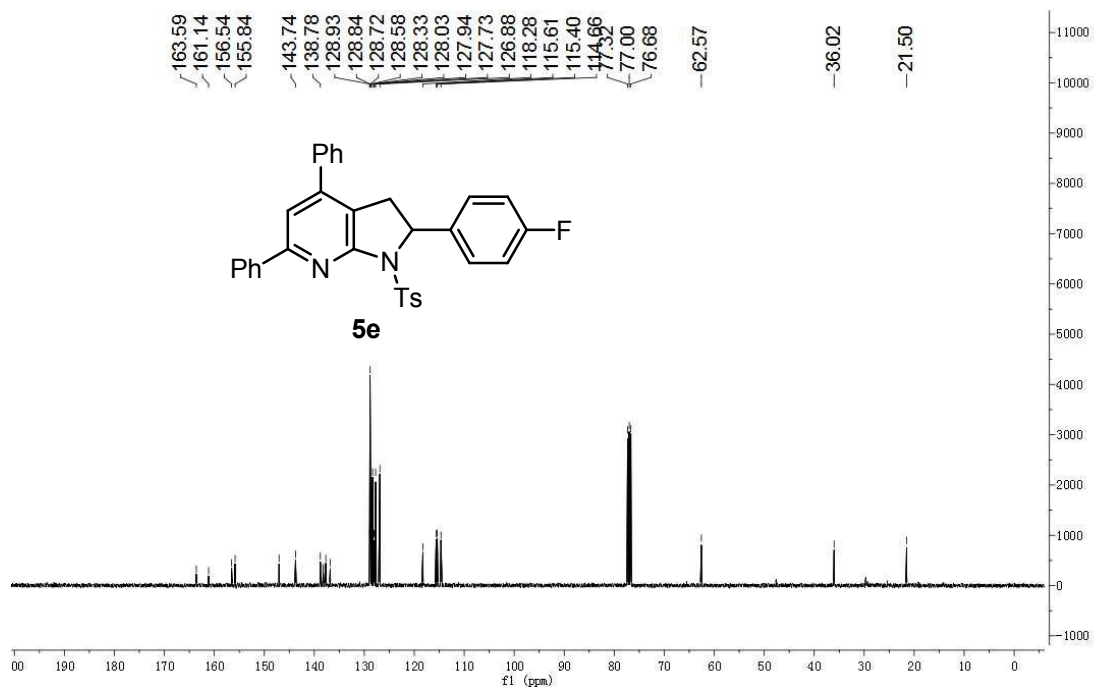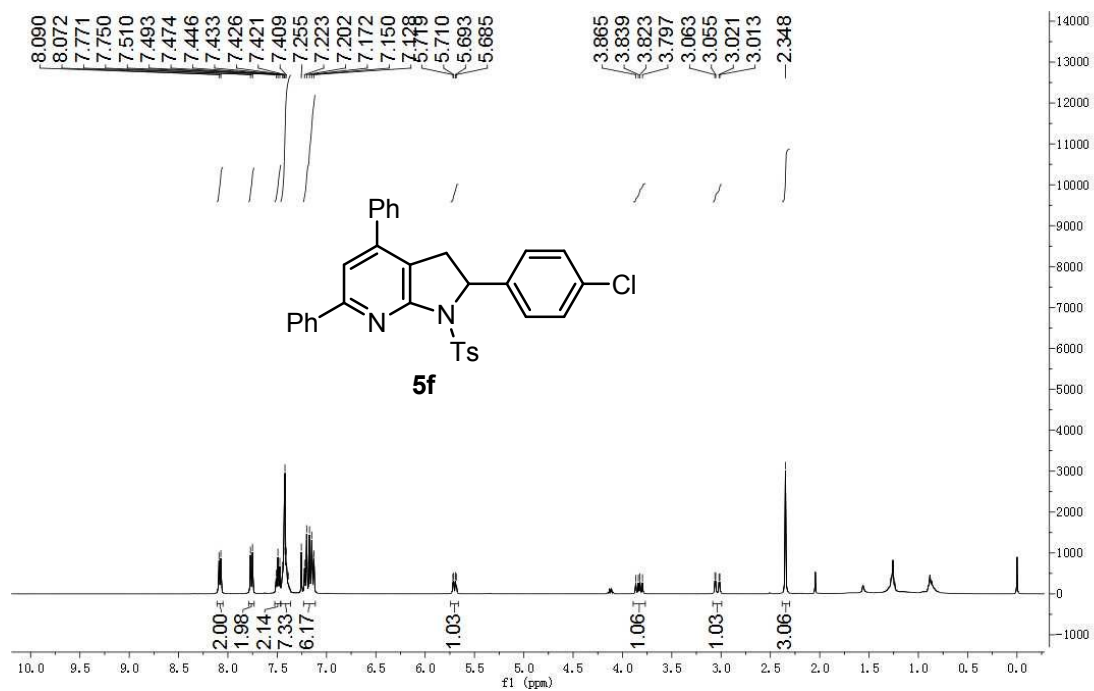

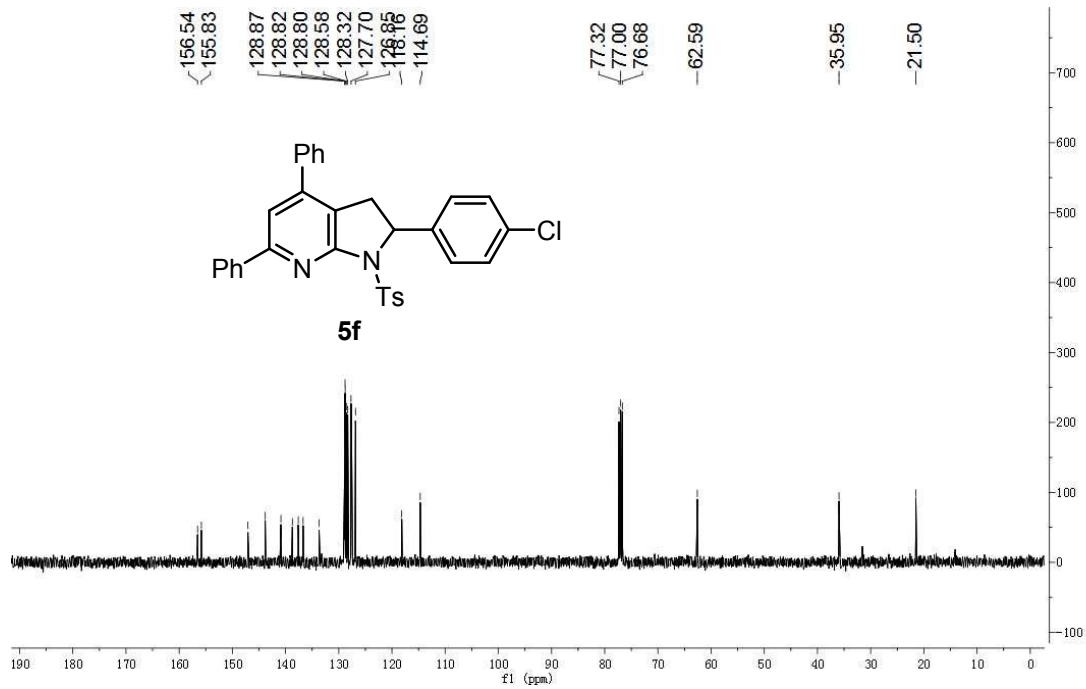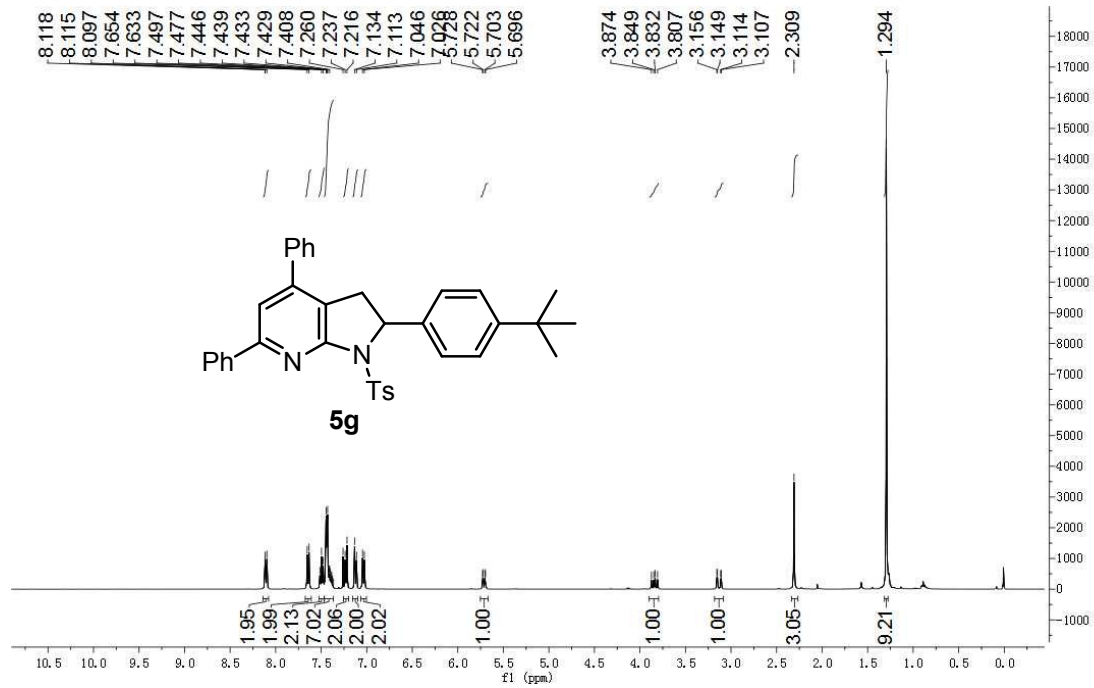

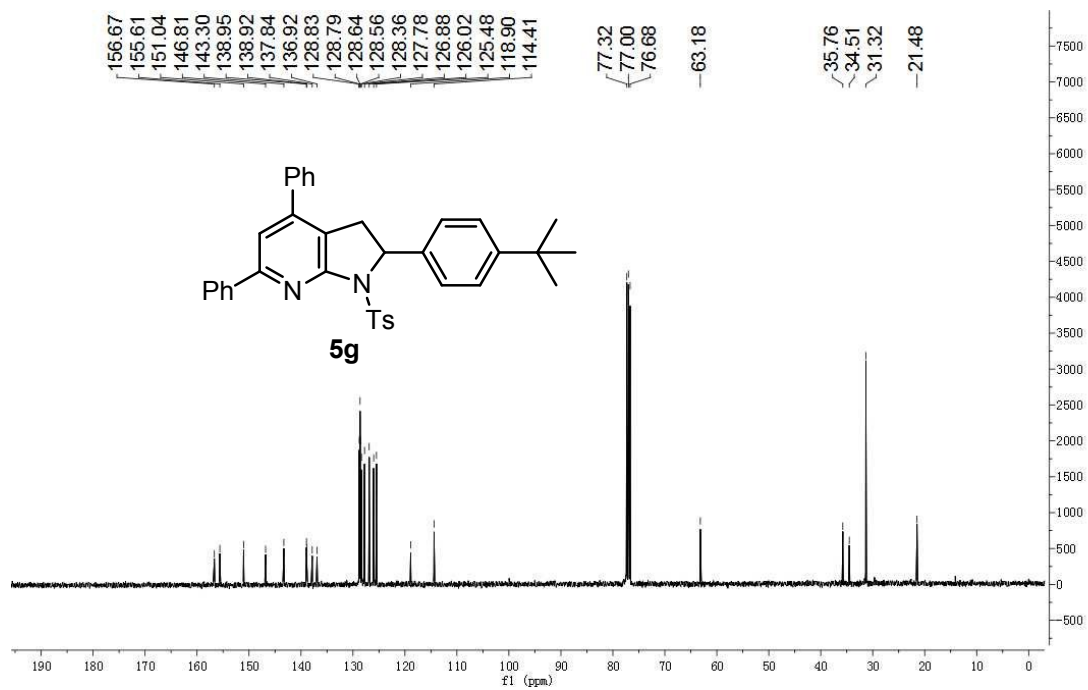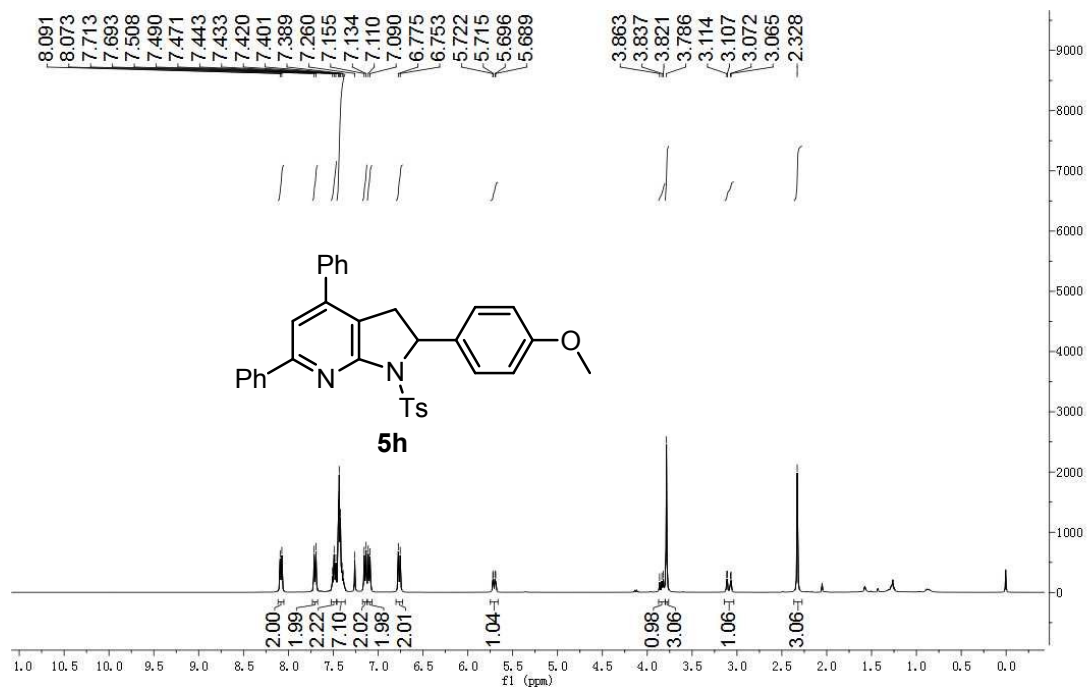

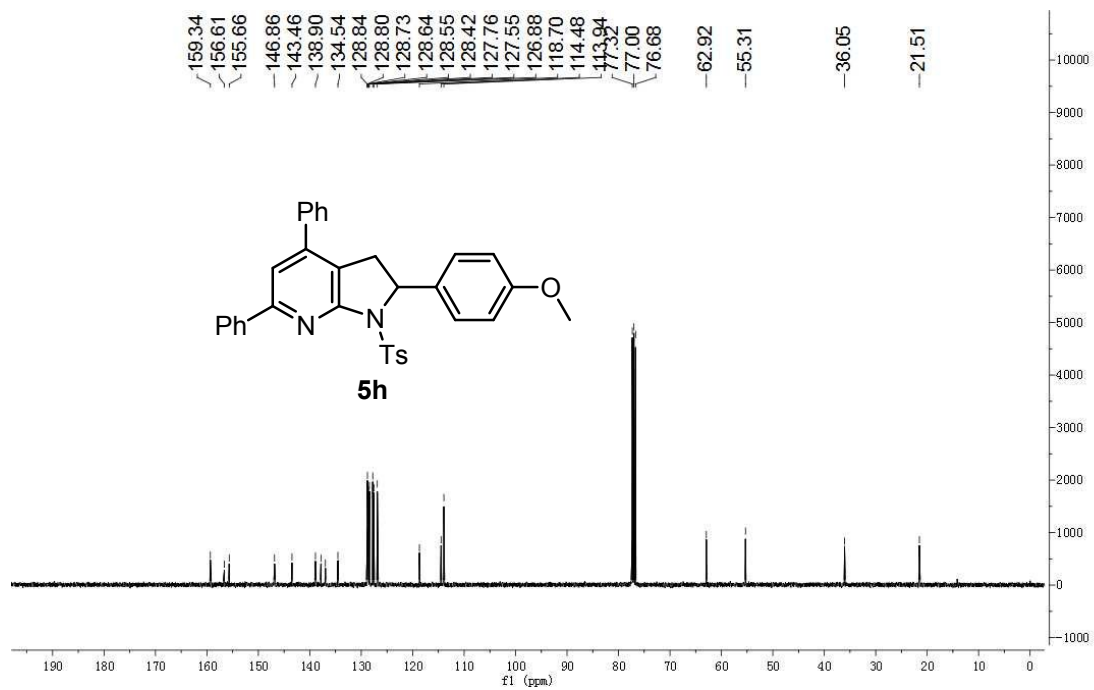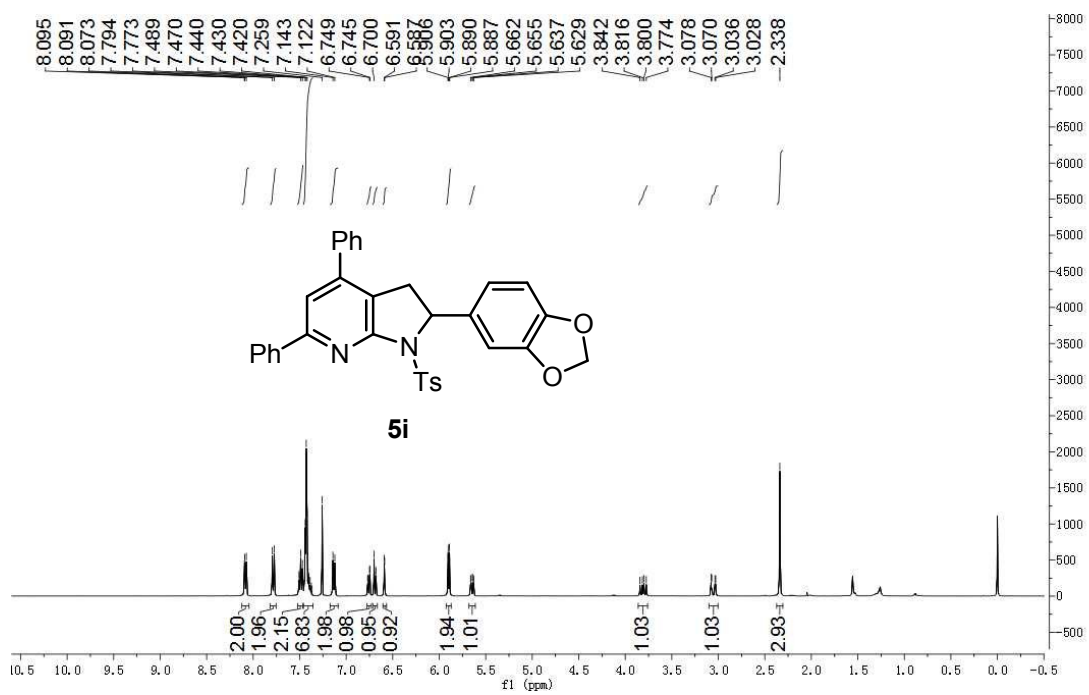

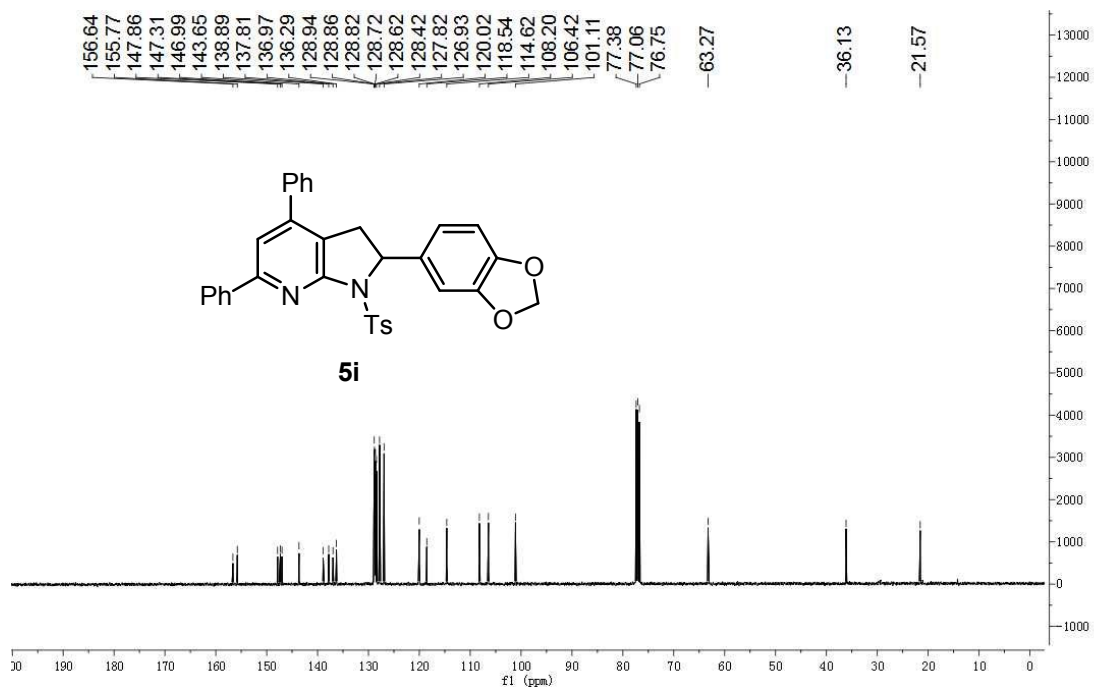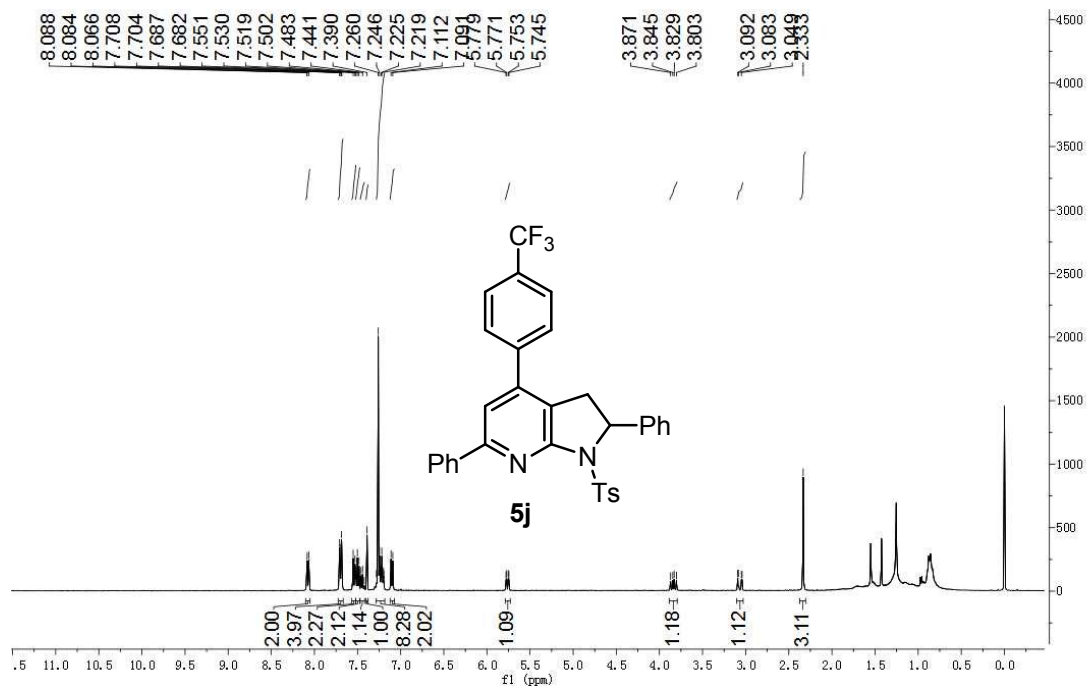

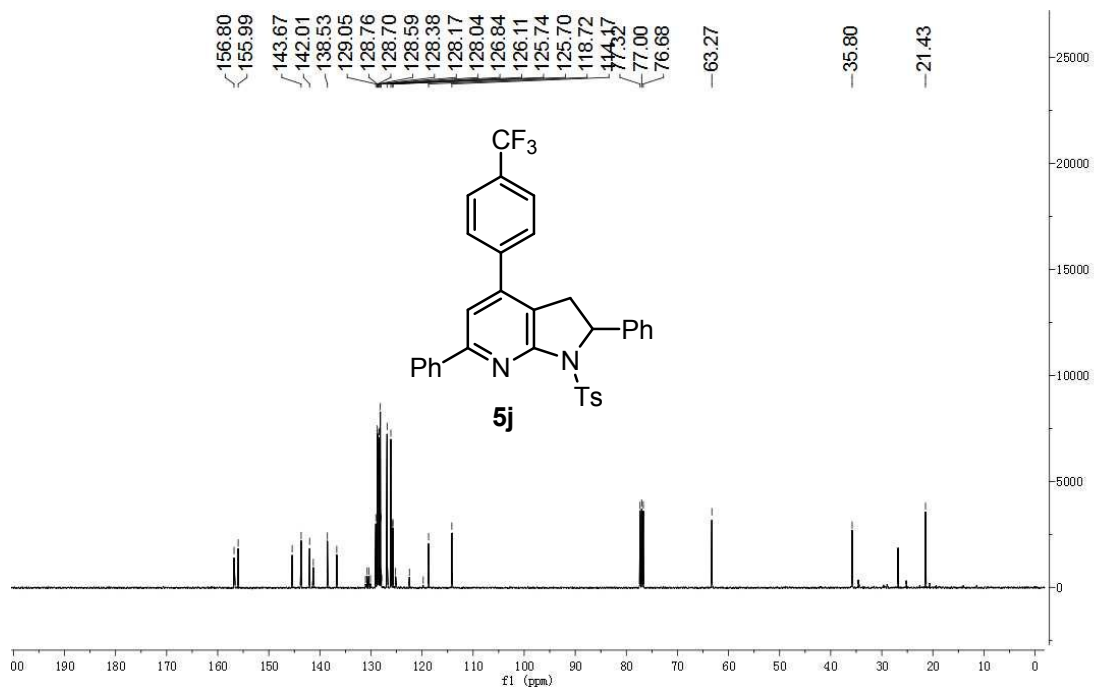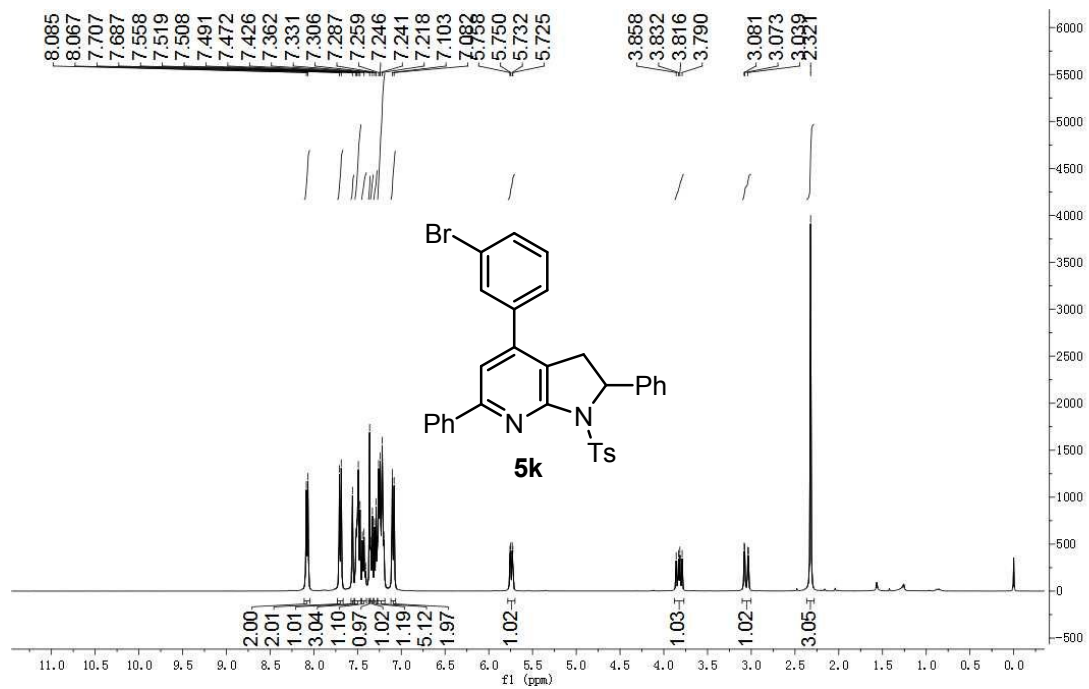

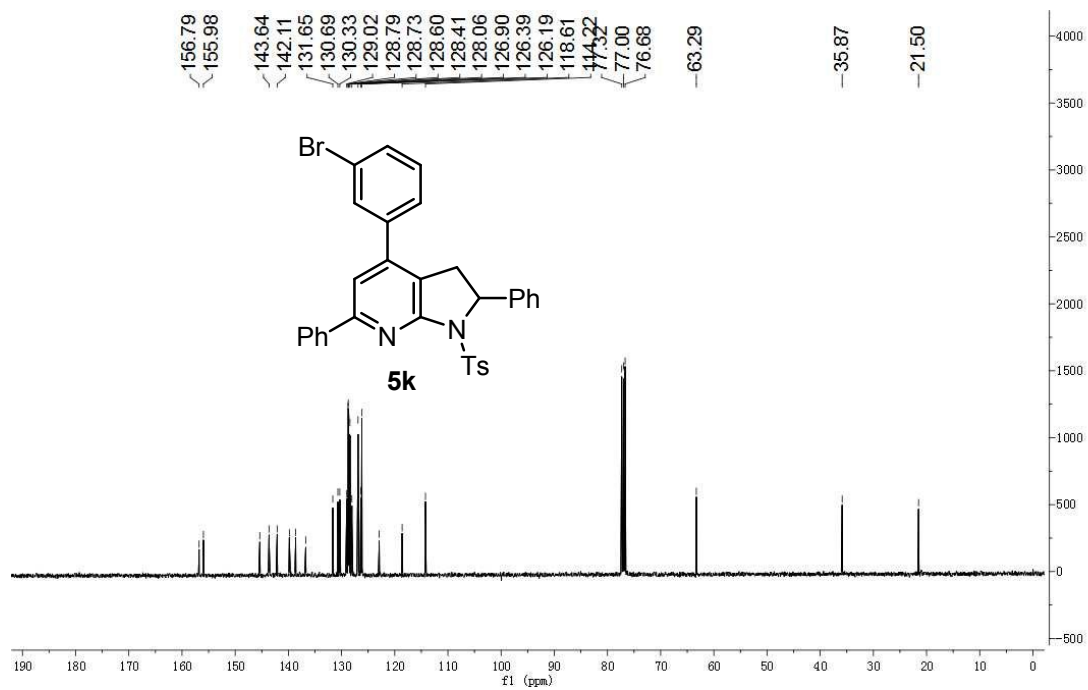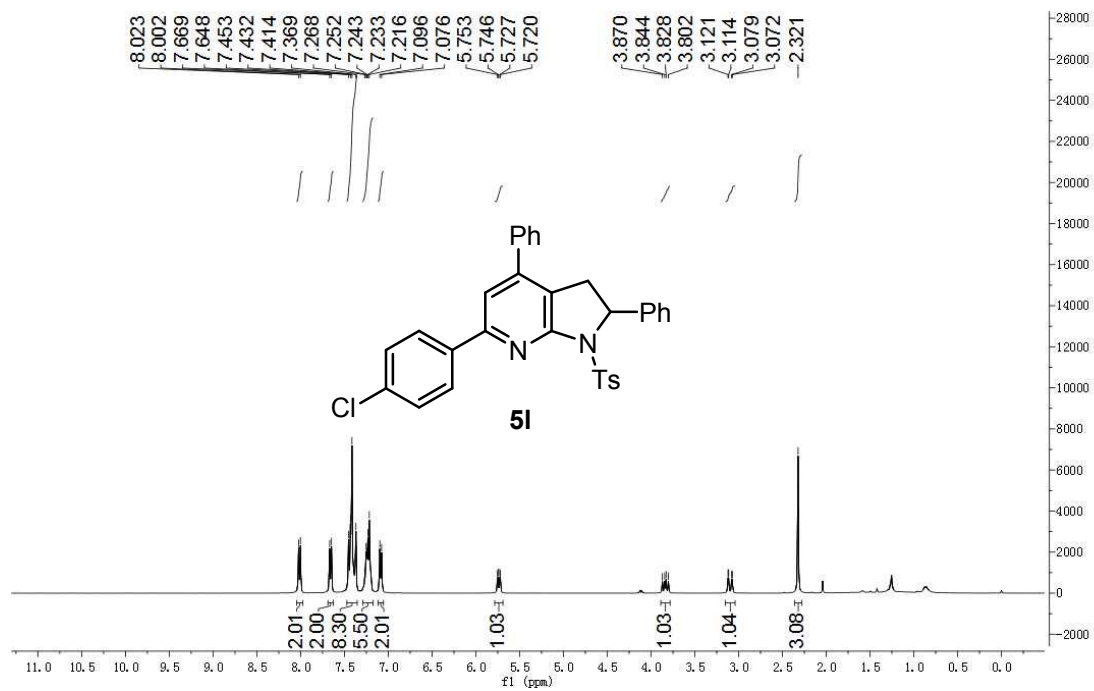

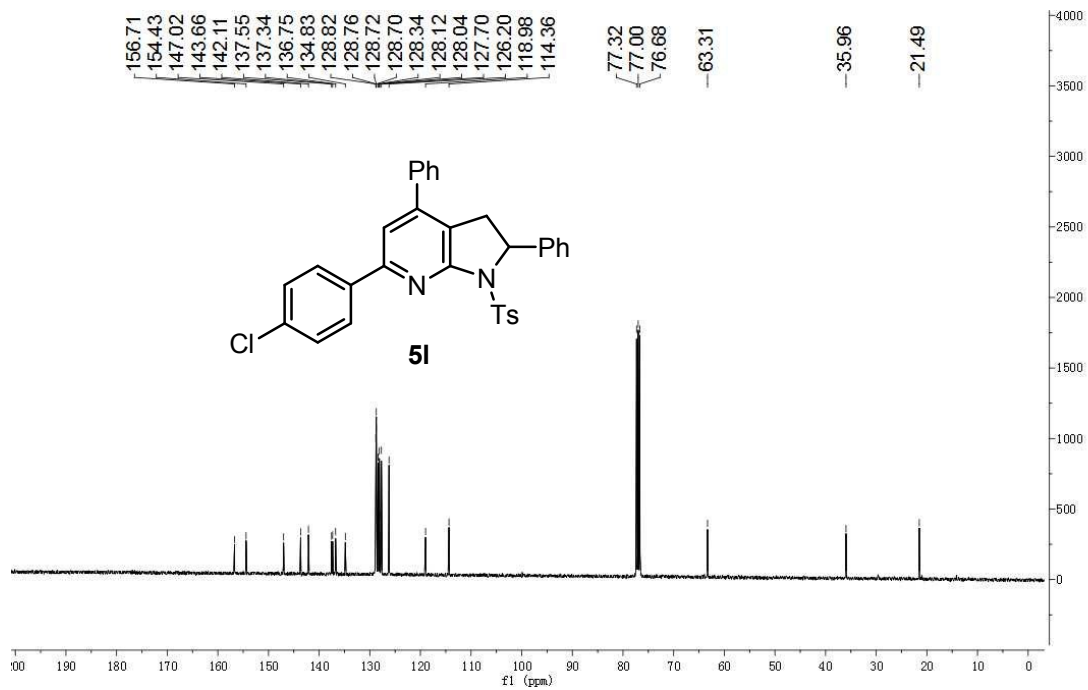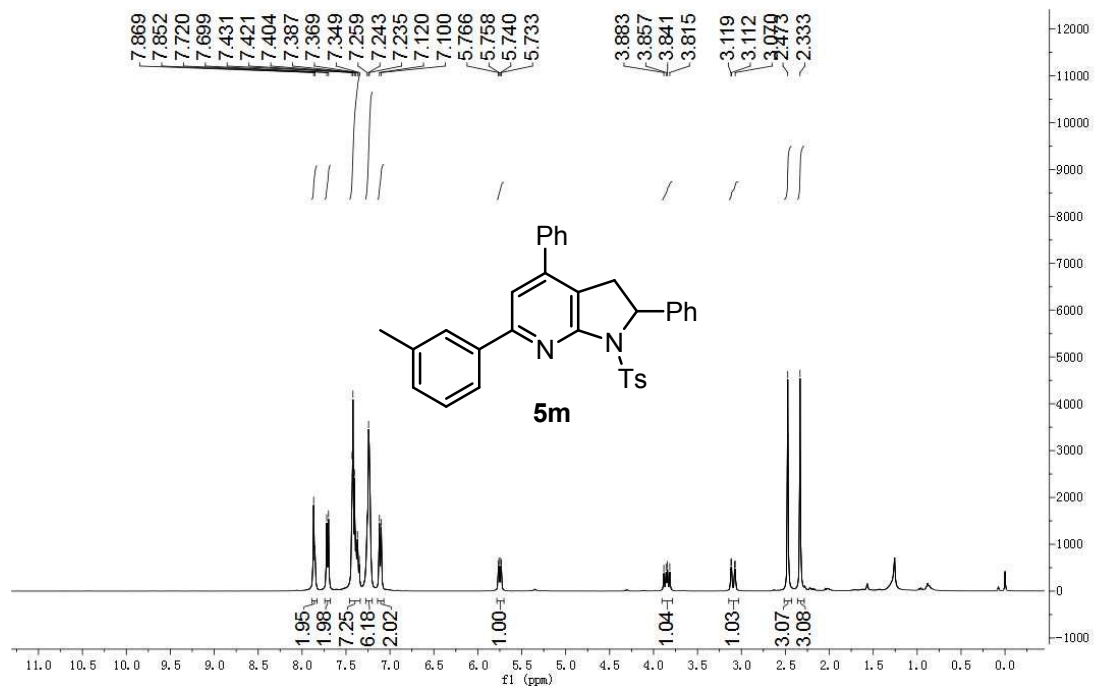



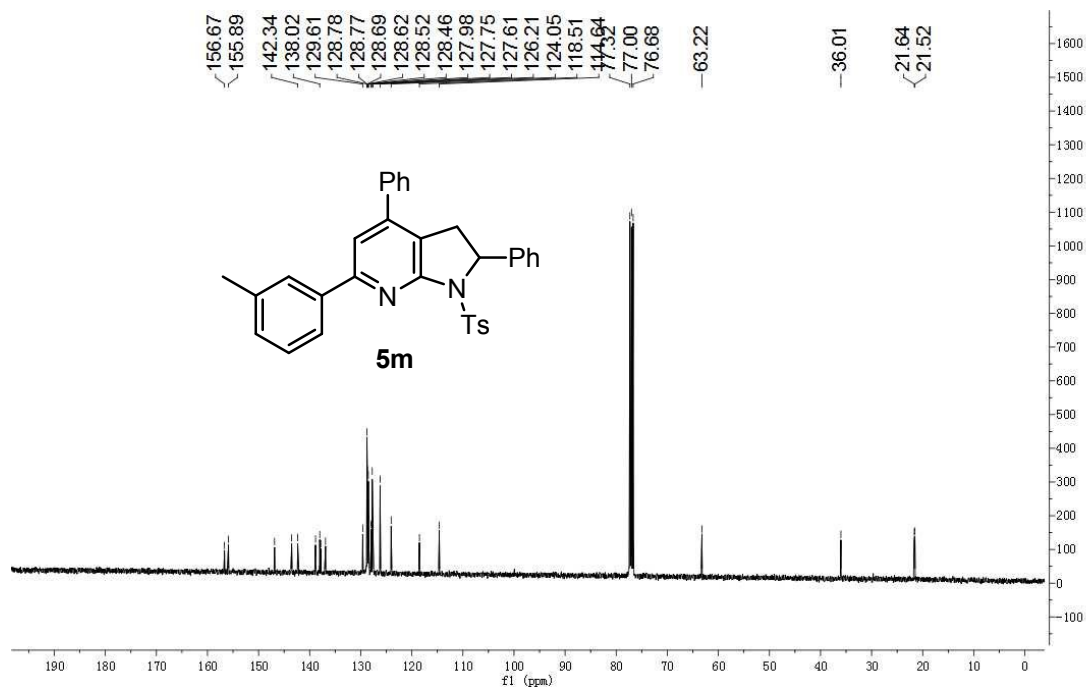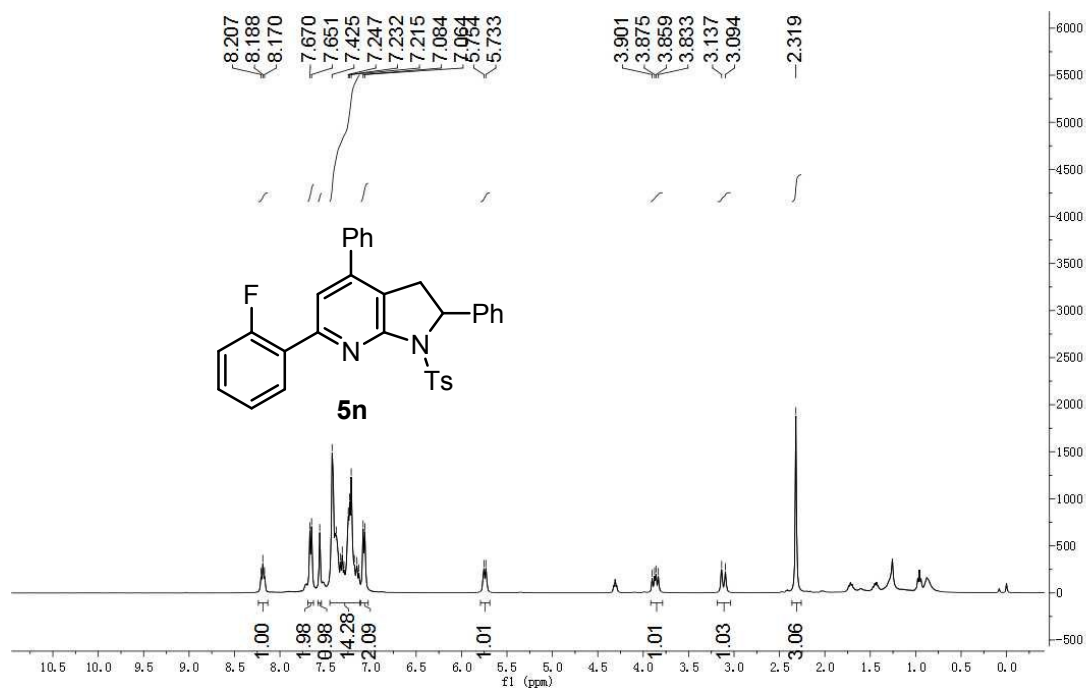

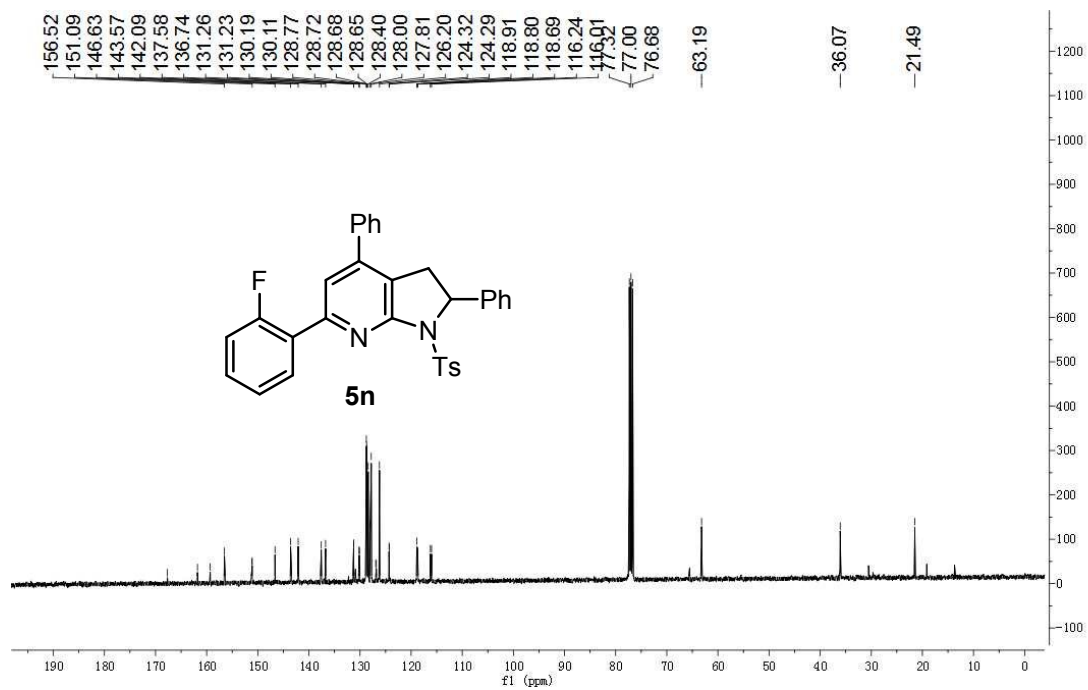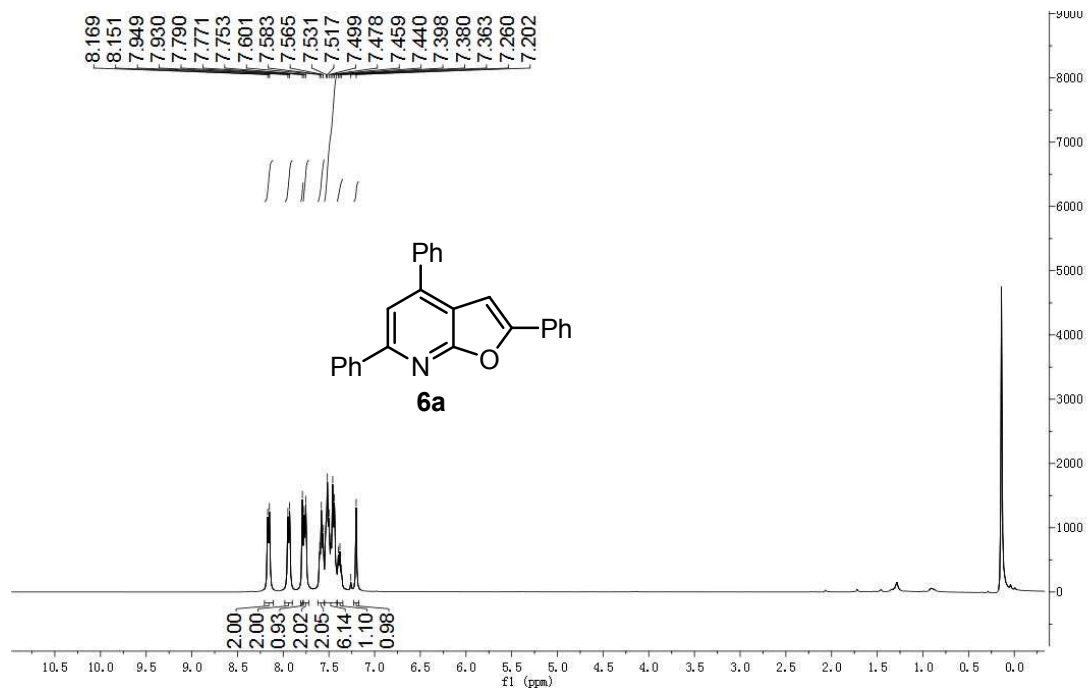

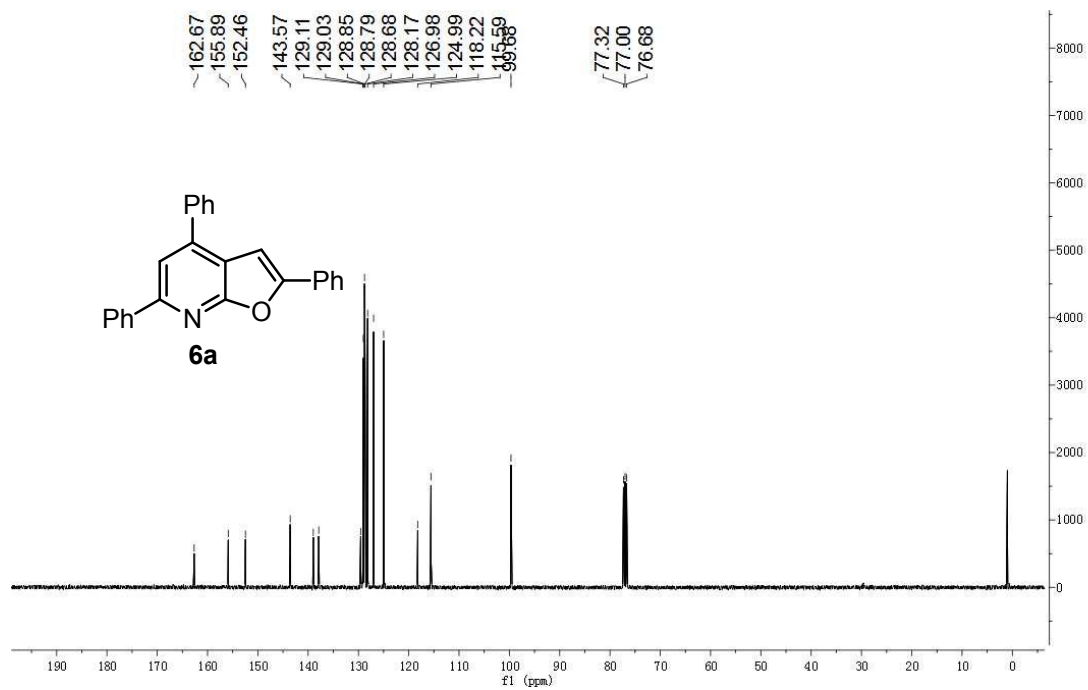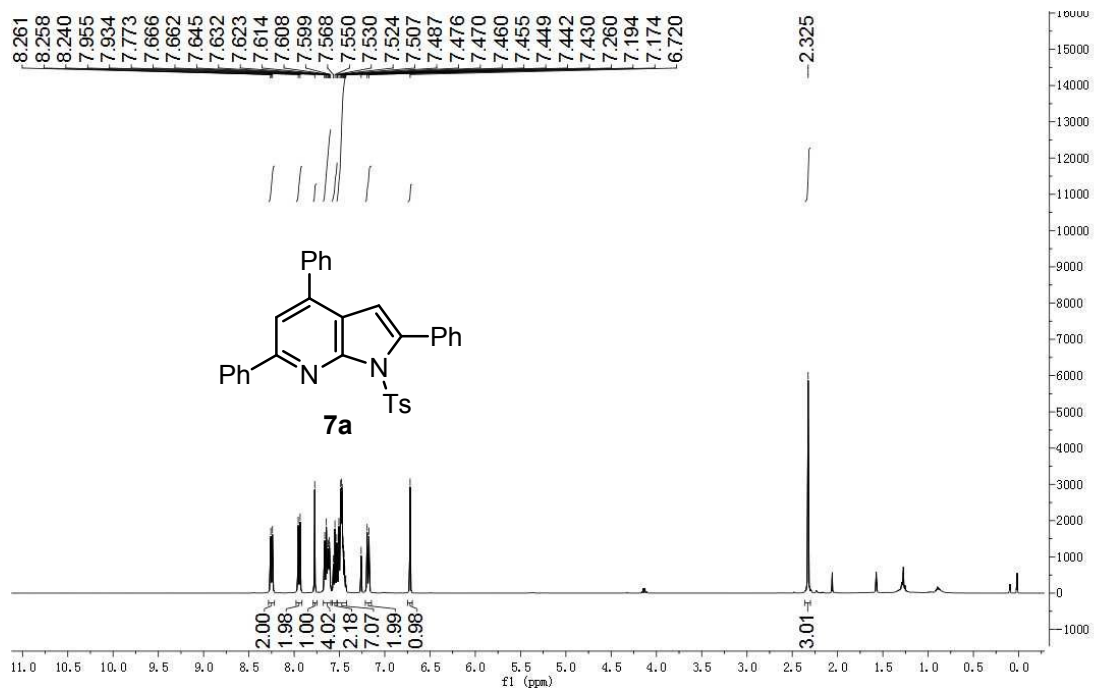

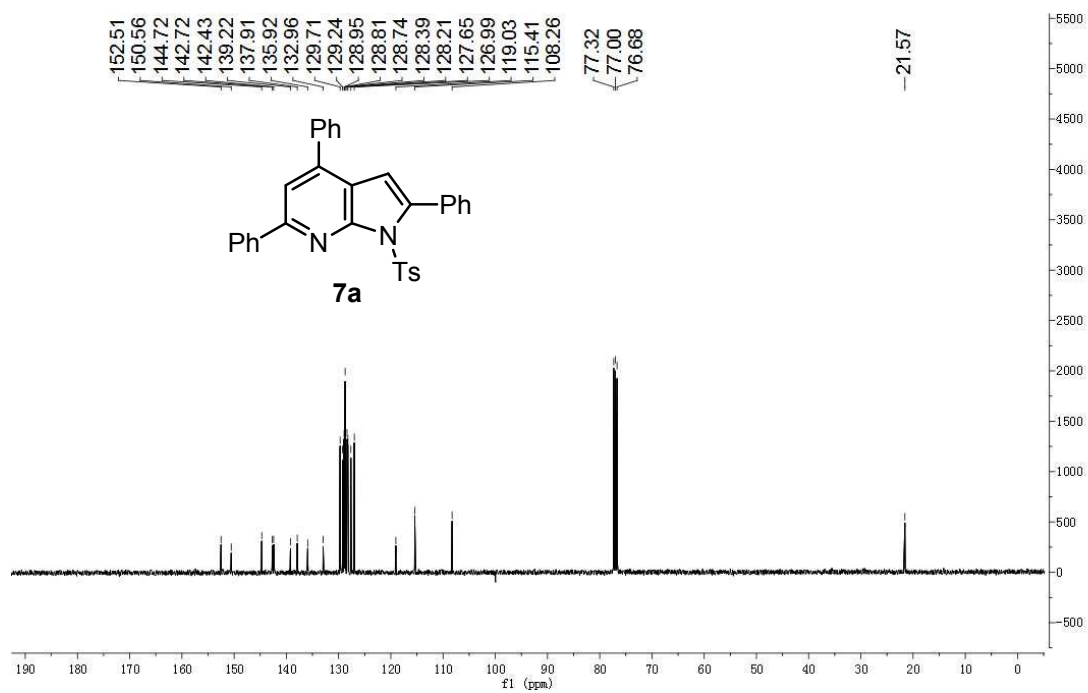

Supplement: c7cc03308g1.pdf [file c7cc03308g1.pdf]
